# Supplementary material for: A Label-Free Proteomic and Complementary Metabolomic Analysis of Leaves of the Resurrection Plant Xerophyta schlechteri during Dehydration
Source: MDPI journal article supplement (doi:10.3390/life11111242), 2021-11-16
Supplement: s1 [file s1]

# A Label-Free Proteomic and Complementary Metabolomic Analysis of Leaves of the Resurrection Plant *Xerophyta schlechteri* during Dehydration

Hawwa Gabier <sup>1</sup>, David L. Tabb <sup>2</sup>, Jill M. Farrant <sup>1</sup> and Mohammed Suhail Rafudeen <sup>1,\*</sup>

<sup>1</sup>Department of Molecular and Cell Biology, University of Cape Town, Private Bag X3, Rondebosch 7701, South Africa; hawwa.gabier@alumni.uct.ac.za (H.G.); jill.farrant@uct.ac.za (J.M.F.)

<sup>2</sup>Institute of Infectious Disease and Molecular Medicine, Faculty of Health Sciences, University of Cape Town, Cape Town 7700, South Africa; dtabb@sun.ac.za

<sup>3</sup>Division of Molecular Biology and Human Genetics, Faculty of Medicine and Health Sciences, Stellenbosch University, Cape Town 7500, South Africa

<sup>4</sup>Centre for Bioinformatics and Computational Biology, Stellenbosch University, Stellenbosch 7602, South Africa

\* Correspondence: suhail.rafudeen@uct.ac.za

**Table S1:** List of differentially expressed proteins involved early response to drying identified in *X. schlechteri* leaf samples.

| Accession               | Description                                                                                                                                                                      | base<br>Mean    | log2FoldC<br>hange | p-value         | InterPro             | Go-term          |
|-------------------------|----------------------------------------------------------------------------------------------------------------------------------------------------------------------------------|-----------------|--------------------|-----------------|----------------------|------------------|
| <b>Xvis03_221564-PA</b> | processed-gene-12.109- mRNA-1protein<br>Name:"Similar to Late embryogenesis abundant protein D-34 (Gossypium hirsutum)" AED:0.11<br>eAED:0.19<br>QI:0 0 0 1 1 1 2 0 254          | 2.2082<br>56511 | 2.07869733         | 0.003377<br>706 | IPR00701<br>1 (PFAM) | no GO terms      |
| <b>Xvis03_200886-PA</b> | augustus-gene-6.42- mRNA-1protein<br>Name:"Similar to PLP1 Patatin-like protein 1 (Oryza sativa subsp. japonica)" AED:0.26<br>eAED:0.26<br>QI:72 0.4 0.16 1 1 1 6 0 3<br>1<br>4  | 2.8898<br>69909 | 1.55299452<br>9    | 0.004367<br>183 | IPR00264<br>1 (PFAM) | P:GO:000662<br>9 |
| <b>Xvis03_220002-PA</b> | augustus-gene-50.23- mRNA-1protein<br>Name:"Similar to Desiccation-related protein PCC3-06 (Craterostigma plantagineum)" AED:0.00<br>eAED:0.00<br>QI:100 1 1 1 1 1 2 285 21<br>8 | 8.3481<br>686   | 1.70902689<br>7    | 0.007333<br>848 |                      | no GO terms      |

|                         |                                                                                                                                                                                                              |                 |                 |                 |                          |                                                        |
|-------------------------|--------------------------------------------------------------------------------------------------------------------------------------------------------------------------------------------------------------|-----------------|-----------------|-----------------|--------------------------|--------------------------------------------------------|
| <b>Xvis03_225004-PA</b> | processed-gene-0.29-mRNA-1 protein<br>Name:"Similar to GLU Ferredoxin-dependent glutamate synthase, chloroplastic (Oryza sativa subsp. japonica)"<br>AED:0.15 eAED:0.20<br>QI:0 0.82 0.86 0.94 1 1 36 0 1763 | 4.5383<br>97579 | 1.09387298<br>4 | 0.010961<br>575 | IPR01793<br>2 (PFAM)     |                                                        |
| <b>Xvis03_211917-PA</b> | augustus-gene-8.2- mRNA-1 protein<br>Name:"Similar to UGT78D2 UDP-glycosyltransferase 78D2 (Arabidopsis thaliana)"<br>AED:0.00 eAED:0.00<br>QI:173 1 1 1 1 1 2 210 45 4                                      | 1.6966<br>12041 | 1.92098986<br>8 | 0.011244<br>498 | IPR00221<br>3 (PFAM)     | F:GO:001675<br>8                                       |
| <b>Xvis03_202087-PA</b> | augustus-gene-8.14-mRNA-1 protein<br>Name:"Similar to AAE3 Oxalate--CoA ligase (Arabidopsis thaliana)"<br>AED:0.02 eAED:0.02<br>QI:521 1 1 1 1 1 4 258 51 7                                                  | 2.2123<br>68933 | 1.70659942<br>2 | 0.01303         | IPR00087<br>3 (PFAM)     | F:GO:000382<br>4                                       |
| <b>Xvis03_203578-PA</b> | processed-gene-12.33-mRNA-1 protein<br>Name:"Similar to Polyphenol oxidase, chloroplastic (Vitis vinifera)" AED:0.36 eAED:0.40<br>QI:797 0.5 0.33 1 1 1 3 0 2 73                                             | 4.5515<br>93209 | 0.95085778<br>2 | 0.016000<br>633 | IPR00222<br>7            | F:GO:000409<br>7;F:GO:0016491;P:GO:0055114             |
| <b>Xvis03_211325-PA</b> | augustus-gene-1.70- mRNA-1 protein<br>Name:"Similar to GDCSPA Glycine Dehydrogenase (decarboxylating) A, mitochondrial (Flaveria pringlei)" AED:0.11 eAED:0.11<br>QI:248 0.76 0.85 1 1 1 14 3 21 903         | 10.765<br>76001 | 0.72916386<br>2 | 0.016180<br>98  | IPR00259<br>1<br>(PFAM); | F:GO:000382<br>4;F:GO:0004375;P:GO:0006546;P:GO:005514 |
| <b>Xvis03_221126-PA</b> | processed-gene-11.3-mRNA-1 protein<br>Name:"Similar to Mavicyanin (Cucurbita pepo)" AED:0.03 eAED:0.03<br>QI:68 1 1 1 1 1 2 217 190                                                                          | 0.7358<br>49705 | 1.86719922      | 0.016866<br>27  | IPR00897<br>2            | F:GO:000905                                            |

|                         |                                                                                                                                                                                                           |                 |                 |                 |                      |                                            |
|-------------------------|-----------------------------------------------------------------------------------------------------------------------------------------------------------------------------------------------------------|-----------------|-----------------|-----------------|----------------------|--------------------------------------------|
| <b>Xvis03_225456-PA</b> | processed-gene-0.12- mRNA-1 protein<br>Name:"Similar to Polyphenol oxidase, chloroplastic (Vitis vinifera)" AED:0.01 eAED:0.01<br>QI:289 1 1 1 1 2 284 597                                                | 3.9532<br>37343 | 0.91393486      | 0.026841<br>309 | IPR00222<br>7 (PFAM) | F:GO:000409<br>7;F:GO:0016491;P:GO:0055114 |
| <b>Xvis03_222086-PA</b> | processed-gene-4.0- mRNA-1 protein<br>Name:"Similar to SBT3.3 Subtilisin-like protease SBT3.3 (Arabidopsis thaliana)" AED:0.15 eAED:0.15<br>QI:86 0.88 0.8 1 1 0.9 10 0 661                               | 7.0814<br>85008 | 0.90675084<br>6 | 0.028952<br>361 | IPR03704<br>5        | no GO terms                                |
| <b>Xvis03_215744-PA</b> | processed-gene-5.46- mRNA-1 protein<br>Name:"Similar to CAL1 Calmodulin (Medicago sativa)" AED:0.17 eAED:0.17<br>QI:127 1 1 1 1 2 496 149                                                                 | 0.8846<br>96437 | 1.63547264<br>7 | 0.030612<br>647 | IPR00204<br>8 (PFAM) | F:GO:000550<br>9;P:GO:0019722              |
| <b>Xvis03_210936-PA</b> | augustus-gene-1.31- mRNA-1 protein<br>Name:"Similar to At5g61250 Heparanase-like protein 2 (Arabidopsis thaliana)" AED:0.14 eAED:0.14<br>QI:264 0.22 0.2 1 0.88 0.9 10 0 512                              | 4.2412<br>27829 | 0.95413208<br>9 | 0.034425<br>962 | IPR00519<br>9 (PFAM) | C:GO:00160<br>20;F:GO:0016798              |
| <b>Xvis03_225004-PA</b> | augustus-gene-8.38- mRNA-1 protein<br>Name:"Similar to GLU Ferredoxin-dependent glutamate synthase, chloroplastic (Oryza sativa subsp. japonica)" AED:0.12 eAED:0.12<br>QI:225 0.96 1 1 0.96 1 32 87 1535 | 4.6276<br>47757 | 0.95110059      | 0.036775<br>888 | IPR03648<br>5        | no GO terms                                |
| <b>Xvis03_207220-PA</b> | augustus-gene-29.99- mRNA-1 protein<br>Name:"Similar to Bowman-Birk type trypsin                                                                                                                          | 1.4674<br>85389 | 1.49031191<br>4 | 0.037523<br>55  | IPR00087<br>7 (PFAM) | F:GO:000486<br>7;C:GO:0005576              |

|                         |                                                                                                                                                                                                              |                 |                 |                 |                      |                                                                                      |
|-------------------------|--------------------------------------------------------------------------------------------------------------------------------------------------------------------------------------------------------------|-----------------|-----------------|-----------------|----------------------|--------------------------------------------------------------------------------------|
|                         | inhibitor (Triticum aestivum)" AED:0.14<br>eAED:0.14<br>QI:36 1 1 1 1 2 205 120                                                                                                                              |                 |                 |                 |                      |                                                                                      |
| <b>Xvis03_225299-PA</b> | processed-gene-<br>0.7- mRNA-1<br>protein<br>Name:"Similar to AGT1<br>Serine--glyoxylate<br>aminotransferase<br>(Arabidopsis thaliana)"<br>AED:0.11 eAED:0.11<br>QI:101 1 1 1 0.8 0.66 6 20<br>8<br> 401     | 5.4582<br>4752  | 0.79565154<br>8 | 0.042740<br>279 | IPR01542<br>1        | F:GO:000382<br>4                                                                     |
| <b>Xvis03_206589-PA</b> | processed-gene-9.106-<br>mRNA-1 protein<br>Name:"Similar to<br>CYP74A2 Allene oxide<br>synthase 2 (Oryza<br>sativa subsp.<br>japonica)"<br>AED:0.00 eAED:0.00<br>QI:0 -1 0 1 -<br>1 1 1 0 486                | 4.1895<br>43295 | 0.85953689<br>8 | 0.042986<br>185 | IPR00112<br>8 (PFAM) | F:GO:000556<br>;F:GO:00165<br>F:GO:002003<br>7;P:GO:0055<br>114                      |
| <b>Xvis03_221325-PA</b> | processed-gene-<br>6.29- mRNA-1<br>protein<br>Name:"Similar to B19.4<br>Late embryogenesis<br>abundant protein B19.4<br>(Hordeum vulgare)"<br>AED:0.16 eAED:0.16<br>QI:0 0.66 0.5 0.75 1 1 4 1<br>1<br>7 181 | 3.8430<br>70937 | 1.15948316<br>1 | 0.044432<br>356 | IPR03895<br>6 (PFAM) | no GO terms                                                                          |
| <b>Xvis03_223476-PA</b> | augustus-gene-2.101-<br>mRNA-1<br>protein<br>Name:"Similar<br>to<br>Pyruvate kinase,<br>cytosolic<br>isozyme (Glycine max)"<br>AED:0.04 eAED:0.04<br>QI:138 1 1 1 1 1 3 406 53<br>3                          | 3.2602<br>31664 | 0.98750497      | 0.047705<br>112 | IPR00169<br>7        | F:GO:000028<br>7;F:GO:0003<br>824;F:GO:00<br>04743;P:GO:<br>0006096;F:G<br>O:0030955 |
| <b>Xvis03_223774-PA</b> | processed-gene-<br>15.13- mRNA-1<br>protein<br>Name:"Similar to Late<br>embryogenesis abundant<br>protein 76 (Brassica<br>napus)" AED:0.02<br>eAED:0.02<br>QI:314 1 1 1 1 1 3 870 26<br>6                    | 3.8306<br>48677 | 1.53385823<br>4 | 0.047990<br>256 | IPR00486<br>4 (PFAM) | no GO terms                                                                          |
| <b>Xvis03_221252-PA</b> | processed-gene-1.52-<br>mRNA-1 protein<br>Name:"Similar to<br>SPG20<br>Spartin (Homo sapiens)"<br>AED:0.03 eAED:0.03                                                                                         | 2.6149<br>50623 | 1.38375868<br>6 | 0.049376<br>875 | IPR00968<br>6        | no GO terms                                                                          |

QI:113|1|1|1|1|1|4|834|40  
1

**Table S2:** List of differentially expressed proteins involved mid response to drying identified in *X. schlechteri* leaf samples.

| Accession                          | Description                                                                                                                                                                                | base<br>Mean | log2FoldC<br>hange | pvalue       | InterPro                | Go-Terms                      |
|------------------------------------|--------------------------------------------------------------------------------------------------------------------------------------------------------------------------------------------|--------------|--------------------|--------------|-------------------------|-------------------------------|
| <b>Xvis03_22</b><br><b>0002-PA</b> | processed-gene-8.116-<br>mRNA-1 protein<br>Name:"Similar to<br>Desiccation-related protein<br>PCC3-06 (Craterostigma<br>plantagineum)" AED:0.00<br>eAED:0.00<br>QI:334 1 1 1 1 1 2 386 231 | 8.3481<br>7  | 2.74168            | 1.13E-<br>05 |                         | no GO terms                   |
| <b>Xvis03_20</b><br><b>2087-PA</b> | augustus-gene-8.14-mRNA-<br>1 protein Name:"Similar to<br>AAE3 Oxalate--CoA ligase<br>(Arabidopsis thaliana)"<br>AED:0.02 eAED:0.02<br>QI:521 1 1 1 1 1 4 258 517                          | 2.2123<br>7  | 2.3688             | 0.00046      | IPR0008<br>73<br>(PFAM) | F:GO:0003824                  |
| <b>Xvis03_20</b><br><b>4003-PA</b> | augustus-gene-27.86-<br>mRNA-1 protein<br>Name:"Similar to Aldose<br>reductase (Hordeum<br>vulgare)" AED:0.09<br>eAED:0.09<br>QI:204 1 1 1 1 1 9 270 319                                   | 3.1744<br>1  | 1.94368            | 0.0005       | IPR0204<br>71           | F:GO:0016491;<br>P:GO:0055114 |
| <b>Xvis03_21</b><br><b>1917-PA</b> | augustus-gene-8.2-mRNA-1<br>protein Name:"Similar to<br>UGT78D2 UDP-<br>glycosyltransferase 78D2<br>(Arabidopsis thaliana)"<br>AED:0.00 eAED:0.00<br>QI:173 1 1 1 1 1 2 210 454            | 1.6966<br>1  | 2.56191            | 0.00066      | IPR0022<br>13<br>(PFAM) | F:GO:0016758                  |
| <b>Xvis03_21</b><br><b>5617-PA</b> | late embryogenesis<br>abundant protein D-29                                                                                                                                                | 3.298<br>73  | 2.03005            | 0.0009       |                         | no GO terms                   |

|                                    |                                                                                                                                                                                                                           |             |         |         |                          |                               |
|------------------------------------|---------------------------------------------------------------------------------------------------------------------------------------------------------------------------------------------------------------------------|-------------|---------|---------|--------------------------|-------------------------------|
| <b>Xvis03_22</b><br><b>1325-PA</b> | processed-gene-6.29-<br>mRNA-1 protein<br>Name:"Similar to B19.4 Late<br>embryogenesis abundant<br>protein B19.4 (Hordeum<br>vulgare)" AED:0.16<br>eAED:0.16<br>QI:0 0.66 0.5 0.75 1 1 4 117 <br>181                      | 3.843<br>07 | 1.81639 | 0.00126 | IPR0389<br>56<br>(PFAM)  | no GO terms                   |
| <b>Xvis03_21</b><br><b>0802-PA</b> | processed-gene-9.8-mRNA-<br>1 protein Name:"Similar to<br>LTI65 Low-temperature-<br>induced 65 kDa protein<br>(Arabidopsis thaliana)"<br>AED:0.00 eAED:0.00<br>QI:247 1 1 1 1 1 5 289 574                                 | 3.507<br>13 | 2.00575 | 0.00161 |                          | P:GO:0009737                  |
| <b>Xvis03_21</b><br><b>6950-PA</b> | augustus-gene-2.19-mRNA-<br>1 protein Name:"Similar to 11<br>kDa late embryogenesis<br>abundant protein (Helianthus<br>annuus)" AED:0.13<br>eAED:0.13<br>QI:0 0.5 0.33 0.66 1 1 3 337 <br>255                             | 5.285<br>24 | 1.65506 | 0.00189 | IPR0055<br>13<br>(PFAM)  | P:GO:0009793                  |
| <b>Xvis03_22</b><br><b>1252-PA</b> | augustus-gene-6.27-mRNA-<br>1 protein Name:"Similar to<br>SPG20 Spartin (Homo<br>sapiens)" AED:0.04<br>eAED:0.04<br>QI:93 1 1 1 0.75 0.6 5 21 403                                                                         | 2.614<br>95 | 2.13635 | 0.00196 | IPR0096<br>86<br>(PFAM); | no GO terms                   |
| <b>Xvis03_21</b><br><b>9751-PA</b> | augustus-gene-2.77-mRNA-<br>1 protein Name:"Similar to<br>GAPC3 Glyceraldehyde-3-<br>phosphate dehydrogenase 3,<br>cytosolic (Oryza sativa subsp.<br>japonica)" AED:0.27<br>eAED:0.27<br>QI:255 0.9 1 1 1 1 1 366 28<br>8 | 12.40<br>61 | 0.86947 | 0.00568 | IPR0208<br>31            | F:GO:0016620;<br>P:GO:0055114 |
| <b>Xvis03_21</b><br><b>1956-PA</b> | embryonic protein DC-8<br>isoform X2                                                                                                                                                                                      | 10.54<br>62 | 1.45642 | 0.00591 |                          | no GO terms                   |
| <b>Xvis03_22</b><br><b>1252-PA</b> | augustus-gene-6.27-mRNA-<br>1 protein Name:"Similar to<br>SPG20 Spartin (Homo<br>sapiens)" AED:0.04<br>eAED:0.04                                                                                                          | 1.188<br>63 | 2.13471 | 0.00628 | IPR0096<br>86<br>(PFAM); | no GO terms                   |

QI:93|1|1|1|0.75|0.6|5|21|403

|                                    |                                                                                                                                                                                                                                                 |             |         |         |                         |                |
|------------------------------------|-------------------------------------------------------------------------------------------------------------------------------------------------------------------------------------------------------------------------------------------------|-------------|---------|---------|-------------------------|----------------|
| <b>Xvis03_20</b><br><b>5230-PA</b> | processed-gene-22.97-<br>mRNA-1 protein<br>Name:"Similar to RAB18<br>Dehydrin Rab18<br>(Arabidopsis thaliana)"<br>AED:0.00 eAED:0.00<br>QI:93 1 1 1 1 1 2 247 147                                                                               | 5.055<br>44 | 1.4358  | 0.00704 | IPR0001<br>67<br>(PFAM) | P:GO:0009415   |
| <b>Xvis03_22</b><br><b>0790-PA</b> | augustus-gene-7.89-mRNA- 1<br>protein Name:"Similar to<br>SYNPCC7002_A1590<br>Uncharacterized protein<br>SYNPCC7002_A1590<br>(Synechococcus sp. (strain<br>ATCC 27264 / PCC 7002 / PR-<br>6))" AED:0.04 eAED:0.04<br>QI:148 1 1 1 1 1 6 744 229 | 1.305<br>24 | 2.0387  | 0.00743 | IPR0189<br>71<br>(PFAM) | no<br>GO terms |
| <b>Xvis03_22</b><br><b>1564-PA</b> | augustus-gene-1.8-mRNA-1<br>protein Name:"Similar to Late<br>embryogenesis abundant<br>protein D-34 (Gossypium<br>hirsutum)" AED:0.08<br>eAED:0.23<br>QI:0 0 0.5 1 1 1 2 238 274                                                                | 2.208<br>26 | 1.93331 | 0.0076  | IPR0070<br>11<br>(PFAM) | no GO terms    |
| <b>Xvis03_22</b><br><b>3774-PA</b> | augustus-gene-3.64-mRNA-<br>1 protein Name:"Similar to<br>LEA14-A Late<br>embryogenesis abundant<br>protein Lea14-A<br>(Gossypium hirsutum)"<br>AED:0.40 eAED:0.40<br>QI:0 0 0 1 1 1 2 0 155                                                    | 3.556<br>28 | 1.5758  | 0.00796 | IPR0048<br>64<br>(PFAM) | no GO terms    |
| <b>Xvis03_20</b><br><b>5230-PA</b> | processed-gene-22.97-<br>mRNA-1 protein<br>Name:"Similar to RAB18<br>Dehydrin Rab18<br>(Arabidopsis thaliana)"<br>AED:0.00 eAED:0.00<br>QI:93 1 1 1 1 1 2 247 147                                                                               | 7.330<br>68 | 1.1034  | 0.01074 | IPR0001<br>67<br>(PFAM) | P:GO:0009415   |

|                                    |                                                                                                                                                                                                        |             |         |         |                         |                               |
|------------------------------------|--------------------------------------------------------------------------------------------------------------------------------------------------------------------------------------------------------|-------------|---------|---------|-------------------------|-------------------------------|
| <b>Xvis03_20</b><br><b>8058-PA</b> | Processed-gene-23.43-<br>mRNA-1 protein<br>Name:"Similar to CML18<br>Probable calcium-binding<br>protein CML18 (Oryza sativa<br>subsp. japonica)" AED: 0.02<br>eAED: 0.02 QI:0 -1 0 1 -<br>1 1 1 0 161 | 0.9707      | 1.97236 | 0.01121 |                         | F:GO:0005509                  |
| <b>Xvis03_21</b><br><b>8200-PA</b> | augustus-gene-6.42-mRNA-<br>1 protein Name:"Similar to<br>PLP1 Patatin-like protein 1<br>(Oryza sativa subsp.<br>japonica)" AED:0.26<br>eAED:0.26<br>QI:72 0.4 0.16 1 1 1 6 0 314                      | 2.889<br>87 | 1.4167  | 0.01223 | IPR0026<br>41<br>(PFAM) | P:GO:0006629                  |
| <b>Xvis03_22</b><br><b>0002-PA</b> | processed-gene-8.116-<br>mRNA-1 protein<br>Name:"Similar to<br>Desiccation-related protein<br>PCC3-06 (Craterostigma<br>plantagineum)" AED:0.00<br>eAED:0.00<br>QI:334 1 1 1 1 1 2 386 231             | 8.7458      | 1.4657  | 0.01353 |                         | no GO terms                   |
| <b>Xvis03_22</b><br><b>1512-PA</b> | processed-gene-2.27-<br>mRNA-1 protein<br>Name:"Similar to Late<br>embryogenesis abundant<br>protein 76 (Brassica napus)"<br>AED:0.12 eAED:0.12<br>QI:0 0.33 0.5 0.75 1 1 4 219 <br>192                | 1.444<br>62 | 1.87719 | 0.01396 |                         | no GO terms                   |
| <b>Xvis03_20</b><br><b>2655-PA</b> | processed-gene-53.13-<br>mRNA-1 protein<br>Name:"Similar to CCT2<br>Choline-phosphate<br>cytidyltransferase 2<br>(Arabidopsis thaliana)"<br>AED:0.15 eAED:0.15<br>QI:50 1 1 1 1 1 8 392 291            | 0.988<br>01 | 1.89108 | 0.01521 | IPR0048<br>21<br>(PFAM) | F:GO:0003824;<br>P:GO:0009058 |
| <b>Xvis03_22</b><br><b>1512-PA</b> | processed-gene-2.27-<br>mRNA-1 protein<br>Name:"Similar to Late<br>embryogenesis abundant                                                                                                              | 3.830<br>65 | 1.86211 | 0.01641 |                         | no GO terms                   |



|                  |                                  |        |         |         |         |               |
|------------------|----------------------------------|--------|---------|---------|---------|---------------|
|                  | protein 76 (Brassica napus)"     |        |         |         |         |               |
|                  | AED:0.12 eAED:0.12               |        |         |         |         |               |
|                  | QI:0 0.33 0.5 0.75 1 1 4 219 192 |        |         |         |         |               |
| <b>Xvis03_22</b> | processed-gene-0.13-             | 6.481  | 1.13443 | 0.01683 | IPR0001 | P:GO:0009415  |
| <b>5532-PA</b>   | mRNA-1 protein                   | 03     |         |         | 67      |               |
|                  | Name:"Similar to DHN3            |        |         |         | (PFAM); |               |
|                  | Dehydrin DHN3 (Hordeum           |        |         |         |         |               |
|                  | vulgare)" AED:0.00               |        |         |         |         |               |
|                  | eAED:0.00                        |        |         |         |         |               |
|                  | QI:270 1 1 1 1 1 2 257 183       |        |         |         |         |               |
| <b>Xvis03_22</b> | augustus-gene-1.8-mRNA-1         | 1.7858 | 1.70738 | 0.01734 | IPR0070 | no GO terms   |
| <b>1564-PA</b>   | protein Name:"Similar to         |        |         |         | 11      |               |
|                  | Late embryogenesis abundant      |        |         |         | (PFAM)  |               |
|                  | protein D-34 (Gossypium          |        |         |         |         |               |
|                  | hirsutum)" AED:0.08              |        |         |         |         |               |
|                  | eAED:0.23                        |        |         |         |         |               |
|                  | QI:0 0 0.5 1 1 1 1 2 238 274     |        |         |         |         |               |
| <b>Xvis03_22</b> | augustus-gene-8.38-mRNA-1        | 13.17  | 1.18885 | 0.01741 |         | no GO terms   |
| <b>0240-PA</b>   | protein Name:"Similar to         | 91     |         |         |         |               |
|                  | LEA3 Late embryogenesis          |        |         |         |         |               |
|                  | abundant protein, group 3        |        |         |         |         |               |
|                  | (Oryza sativa subsp. indica)"    |        |         |         |         |               |
|                  | AED:0.00 eAED:0.00               |        |         |         |         |               |
|                  | QI:193 1 1 1 1 1 1 2 266 174     |        |         |         |         |               |
| <b>Xvis03_22</b> | processed-gene-1.22-             | 4.645  | 1.30412 | 0.01772 | IPR0001 | P:GO:0009415  |
| <b>0597-PA</b>   | mRNA-1 protein                   | 28     |         |         | 67      |               |
|                  | Name:"Similar to RAB18           |        |         |         | (PFAM   |               |
|                  | Dehydrin Rab18                   |        |         |         |         |               |
|                  | (Arabidopsis thaliana)"          |        |         |         |         |               |
|                  | AED:0.00 eAED:0.00               |        |         |         |         |               |
|                  | QI:228 1 1 1 1 1 1 2 308 136     |        |         |         |         |               |
| <b>Xvis03_22</b> | Processed-gene-3.71-             | 1.654  | 1.62548 | 0.01843 | IPR0020 | F:GO:0003676; |
| <b>3451-PA</b>   | mRNA-1 protein                   | 54     |         |         | 59      | F:GO:0008270  |
|                  | Name:"Similar to CSP1 Cold       |        |         |         |         |               |
|                  | shock protein 1 (Arabidopsis     |        |         |         |         |               |
|                  | thaliana)" AED: 0.30 eAED:       |        |         |         |         |               |
|                  | 0.30 QI:0 -1 0 1 -1 1 1 0 215    |        |         |         |         |               |
| <b>Xvis03_22</b> | augustus-gene-2.101-             | 3.021  | 1.18192 | 0.02167 | IPR0016 | F:GO:0000287; |
| <b>3476-PA</b>   | mRNA-1 protein                   | 61     |         |         | 97      | F:GO:0003824; |
|                  | Name:"Similar to Pyruvate        |        |         |         |         | F:GO:0004743; |
|                  | kinase, cytosolic isozyme        |        |         |         |         | P:GO:0006096; |
|                  | (Glycine max)" AED:0.04          |        |         |         |         | F:GO:0030955  |
|                  | eAED:0.04                        |        |         |         |         |               |
|                  | QI:138 1 1 1 1 1 3 406 533       |        |         |         |         |               |

|                                    |                                                                                                                                                                                           |               |         |         |                |                                                                                  |
|------------------------------------|-------------------------------------------------------------------------------------------------------------------------------------------------------------------------------------------|---------------|---------|---------|----------------|----------------------------------------------------------------------------------|
| <b>Xvis03_22</b><br><b>2223-PA</b> | processed-gene-2.73-<br>mRNA-1 protein<br>Name:"Similar to HSP70<br>Heat shock cognate 70 kDa<br>protein (Petunia hybrida)"<br>AED:0.11 eAED:0.11<br>QI:205 0.5 0.33 0.66 1 1 3 0 <br>710 | 18.44<br>19   | 0.60753 | 0.02505 | IPR0131<br>26  | no GO terms                                                                      |
| <b>Xvis03_21</b><br><b>0802-PA</b> | processed-gene-9.8-mRNA-<br>1 protein Name:"Similar to<br>LTI65 Low-temperature-<br>induced 65 kDa protein<br>(Arabidopsis thaliana)"<br>AED:0.00 eAED:0.00<br>QI:247 1 1 1 1 1 5 289 574 | 18.10<br>56   | 1.16935 | 0.02542 |                | P:GO:0009737                                                                     |
| <b>Xvis03_21</b><br><b>3342-PA</b> | processed-gene-10.36-<br>mRNA-1 protein<br>Name:"Similar to Histone<br>H4 (Glycine max)" AED: 0.00<br>eAED: 0.01 QI: 0 -<br>1 0 1 -1 1 1 0 103                                            | 8.218<br>74   | 0.81696 | 0.0291  | IPR0019<br>51  | F:GO:0003677;<br>F:GO:0046982                                                    |
| <b>Xvis03_22</b><br><b>3476-PA</b> | augustus-gene-2.101-<br>mRNA-1 protein<br>Name:"Similar to Pyruvate<br>kinase, cytosolic isozyme<br>(Glycine max)" AED:0.04<br>eAED:0.04<br>QI:138 1 1 1 1 1 3 406<br> 533                | 3.53294<br>02 | 1.060   | 0.03324 | IPR0016<br>97  | F:GO:0000287;F:GO:<br>0003824;<br>F:GO:0004743;<br>P:GO:0006096;<br>F:GO:0030955 |
| <b>Xvis03_20</b><br><b>2976-PA</b> | augustus-gene-30.2-mRNA-<br>1 protein Name:"Similar to<br>Blue copper protein (Pisum<br>sativum)" AED:0.02<br>eAED:0.02<br>QI:94 1 1 1 1 1 2 158 189                                      | 0.91783       | 1.60444 | 0.03689 | IPR0089<br>72  | F:GO:0009055                                                                     |
| <b>Xvis03_22</b><br><b>1126-PA</b> | augustus-gene-1.32-mRNA-<br>1 protein Name:"Similar to<br>Mavicyanin (Cucurbita<br>pepo)" AED:0.01 eAED:0.01<br>QI:65 1 1 1 1 1 2 153 186                                                 | 0.73585       | 1.63058 | 0.03825 | IPR0089<br>72) | F:GO:0009055                                                                     |
| <b>Xvis03_22</b><br><b>0240-PA</b> | augustus-gene-8.38-mRNA-<br>1 protein Name:"Similar to<br>LEA3 Late embryogenesis<br>abundant protein, group 3<br>(Oryza sativa subsp. indica)"<br>AED:0.00 eAED:0.00                     | 7.28924       | 1.13228 | 0.03889 |                | no GO terms                                                                      |

QI:193|1|1|1|1|1|2|266|174

|                  |                                                                                                                                                                                       |         |         |         |                    |                                                |
|------------------|---------------------------------------------------------------------------------------------------------------------------------------------------------------------------------------|---------|---------|---------|--------------------|------------------------------------------------|
| <b>Xvis03_22</b> | augustus-gene-6.27-mRNA-                                                                                                                                                              | 2.68011 | 1.34372 | 0.03974 | IPR0096            | no GO terms                                    |
| <b>1252-PA</b>   | 1 protein Name:"Similar to<br>SPG20 Spartin (Homo<br>sapiens)" AED:0.04<br>eAED:0.04<br>QI:93 1 1 1 0.75 0.6 5 21 403                                                                 |         |         |         | 86<br>(PFAM)       |                                                |
| <b>Xvis03_20</b> | processed-gene-6.86-                                                                                                                                                                  | 7.62962 | 0.8021  | 0.04235 | IPR0199            | F:GO:0005515                                   |
| <b>5813-PA</b>   | mRNA-1 protein<br>Name:"Similar to RUB2<br>Ubiquitin-NEDD8-like<br>protein RUB2 (Oryza sativa<br>subsp. japonica)" AED:0.04<br>eAED:0.04<br>QI:73 1 1 1 1 1 3 301 153                 |         |         |         | 56<br>(PRINTS<br>) |                                                |
| <b>Xvis03_20</b> | processed-gene-16.57-                                                                                                                                                                 | 9.19049 | 0.7264  | 0.04322 | IPR0019            | F:GO:0030145;                                  |
| <b>9096-PA</b>   | mRNA-1 protein<br>Name:"Similar to ABP20<br>Auxin-binding protein<br>ABP20 (Prunus persica)"<br>AED:0.02 eAED:0.02<br>QI:173 1 1 1 1 1 2 671 206                                      |         |         |         | 29<br>(PRINTS<br>) | F:GO:0045735                                   |
| <b>Xvis03_20</b> | processed-gene-11.0-                                                                                                                                                                  | 8.90801 | 0.65467 | 0.0444  |                    | F:GO:0003983;                                  |
| <b>2124-PA</b>   | mRNA-1 protein<br>Name:"Similar to UGPA<br>UTP--glucose-1-phosphate<br>uridylyltransferase (Musa<br>acuminata)" AED:0.18<br>eAED:0.18<br>QI:271 0.88 0.89 1 1 1 19 37<br>2 458        |         |         |         |                    | P:GO:0006011;<br>F:GO:0070569                  |
| <b>Xvis03_20</b> | augustus-gene-39.13-                                                                                                                                                                  | 2.41403 | 1.37564 | 0.04789 | IPR0008            | F:GO:0004645;                                  |
| <b>4659-PA</b>   | mRNA-1 protein<br>Name:"Similar to PHS2<br>Alpha-glucan phosphorylase<br>2, cytosolic (Arabidopsis<br>thaliana)" AED:0.23<br>eAED:0.23<br>QI:181 0.92 0.93 1 0.92 0.86 <br>15 169 732 |         |         |         | 11                 | P:GO:0005975;<br>F:GO:0008184;<br>F:GO:0030170 |

|                  |                                                                                                                                                                                   |         |         |         |               |                               |
|------------------|-----------------------------------------------------------------------------------------------------------------------------------------------------------------------------------|---------|---------|---------|---------------|-------------------------------|
| <b>Xvis03_22</b> | augustus-gene-1.8-mRNA-1                                                                                                                                                          | 0.97016 | 1.55308 | 0.04808 | IPR0070       | no GO terms                   |
| <b>1564-PA</b>   | protein Name:"Similar to<br>Late embryogenesis<br>abundant protein D-34<br>(Gossypium hirsutum)"<br>AED:0.08 eAED:0.23<br>QI:0 0 0.5 1 1 1 2 238 274                              |         |         |         | 11<br>(PFAM); |                               |
| <b>Xvis03_20</b> | Processed-gene-16.29-                                                                                                                                                             | 0.91371 | 1.54312 | 0.04923 |               | F:GO:0003747;                 |
| <b>9643-PA</b>   | mRNA-1 protein<br>Name:"Similar to ERF1-3<br>Eukaryotic peptide chain<br>release factor subunit 1-3<br>(Arabidopsis thaliana)"<br>AED: 0.00 eAED: 0.00<br>QI:0 -1 0 1 -1 1 1 0 43 |         |         |         |               | C:GO:0005737;<br>P:GO:0006415 |

**Table S3:** List of differentially expressed proteins involved late response to drying identified in *X. schlechteri* leaf samples.

| Accession                          | Description                                                                                                                                                                                  | base<br>Mean       | log2Fol<br>dC<br>hange | p-<br>value  | InterPro                       | Go-Terms     |
|------------------------------------|----------------------------------------------------------------------------------------------------------------------------------------------------------------------------------------------|--------------------|------------------------|--------------|--------------------------------|--------------|
| <b>Xvis03_22000</b><br><b>2-PA</b> | processed-gene-8.116-mRNA-1<br>protein Name:"Similar to<br>Desiccation-related protein<br>PCC3-06 (Craterostigma<br>plantagineum)" AED:0.00<br>eAED:0.00<br>QI:334 1 1 1 1 1 2 386 231       | 8.745<br>8046<br>6 | 3.3101873<br>2         | 3.45E-<br>09 |                                | no GO terms  |
| <b>Xvis03_22059</b><br><b>7-PA</b> | processed-gene-1.22-mRNA-1<br>protein Name:"Similar to<br>RAB18 Dehydrin Rab18<br>(Arabidopsis thaliana)"<br>AED:0.00 eAED:0.00<br>QI:228 1 1 1 1 1 2 308 136                                | 5.055<br>4445<br>4 | 2.6869117              | 3.86E-<br>08 | IPR0001<br>67<br>(PFAM         | P:GO:0009415 |
| <b>Xvis03_21080</b><br><b>2-PA</b> | processed-gene-9.8-mRNA-1<br>protein Name:"Similar to<br>LTI65 Low-temperature-<br>induced 65 kDa protein<br>(Arabidopsis thaliana)"<br>AED:0.00 eAED:0.00<br>QI:247 1 1 1 1 1 5 289 574     | 3.507<br>1254<br>8 | 3.1803771              | 9.73E-<br>08 | IPR0374<br>91<br>(PANTH<br>ER) | P:GO:0009737 |
| <b>Xvis03_21695</b><br><b>0-PA</b> | augustus-gene-2.19-mRNA-1<br>protein Name:"Similar to 11<br>kDa late embryogenesis<br>abundant protein (Helianthus<br>annuus)" AED:0.13<br>eAED:0.13<br>QI:0 0.5 0.33 0.66 1 1 3 337 25<br>5 | 5.285<br>2439<br>6 | 2.5576639<br>8         | 3.13E-<br>07 | IPR0055<br>13<br>(PFAM)        | P:GO:0009793 |

|                                    |                                                                                                                                                                                                                     |                    |                |              |                         |                                                |
|------------------------------------|---------------------------------------------------------------------------------------------------------------------------------------------------------------------------------------------------------------------|--------------------|----------------|--------------|-------------------------|------------------------------------------------|
| <b>Xvis03_22291</b><br><b>1-PA</b> | processed-gene-1.35-mRNA-1<br>protein Name:"Similar to<br>CHLI Magnesium-chelatase<br>subunit ChII, chloroplastic<br>(Oryza sativa subsp. japonica)"<br>AED:0.00 eAED:0.00<br>QI:218 1 1 1 1 3 269 418              | 4.085<br>6321<br>4 | 2.6524454<br>2 | 3.22E-<br>07 | IPR0005<br>23<br>(PFAM) | F:GO:0005524;<br>P:GO:0015995;<br>F:GO:0016851 |
| <b>Xvis03_22151</b><br><b>2-PA</b> | processed-gene-2.27-mRNA-1<br>protein Name:"Similar to Late<br>embryogenesis abundant protein<br>76 (Brassica napus)" AED:0.12<br>eAED:0.12<br>QI:0 0.33 0.5 0.75 1 1 4 219 19<br>2                                 | 3.830<br>6486<br>8 | 3.8618098<br>9 | 3.60E-<br>07 |                         | no GO terms                                    |
| <b>Xvis03_22036</b><br><b>3-PA</b> | augustus-gene-1.54-mRNA-1<br>protein Name:"Similar to<br>ECU03_1610 Uncharacterized<br>protein ECU03_1610<br>(Encephalitozoon cuniculi<br>(strain GB-M1))" AED:0.03<br>eAED:0.03<br>QI:89 1 1 1 1 2 303 232         | 3.940<br>1913      | 3.0391360<br>5 | 4.19E-<br>07 |                         | no GO terms                                    |
| <b>Xvis03_20076</b><br><b>2-PA</b> | processed-gene-88.24-mRNA-<br>1 protein Name:"Similar to<br>At4g13010 Putative quinone-<br>oxidoreductase homolog,<br>chloroplastic (Arabidopsis<br>thaliana)" AED:0.26<br>eAED:0.26<br>QI:0 1 0.75 1 1 1 4 216 327 | 4.970<br>9242<br>5 | 2.4586390<br>7 | 4.22E-<br>07 | IPR0131<br>54<br>(PFAM) | P:GO:0055114                                   |
| <b>Xvis03_21811</b><br><b>7-PA</b> | augustus-gene-11.3-mRNA-1<br>protein Name:"Similar to<br>Embryonic protein DC-8<br>(Daucus carota)" AED:0.04<br>eAED:0.04<br>QI:0 1 0.66 1 1 1 3 517 510                                                            | 10.54<br>6181<br>4 | 2.5458122<br>3 | 5.48E-<br>07 | PTHR33<br>836:SF1       | P:GO:0009737                                   |
| <b>Xvis03_22125</b><br><b>2-PA</b> | augustus-gene-6.27-mRNA-1<br>protein Name:"Similar to<br>SPG20 Spartina (Homo<br>sapiens)" AED:0.04<br>eAED:0.04<br>QI:93 1 1 1 0.75 0.6 5 21 403                                                                   | 2.614<br>9506<br>2 | 3.2161600<br>6 | 8.75E-<br>07 | IPR0096<br>86<br>(PFAM) | no GO terms                                    |
| <b>Xvis03_22156</b><br><b>4-PA</b> | augustus-gene-1.8-mRNA-1<br>protein Name:"Similar to Late<br>embryogenesis abundant<br>protein D-34 (Gossypium                                                                                                      | 3.298<br>7273<br>7 | 2.8236063<br>3 | 1.02E-<br>06 | IPR0070<br>11<br>(PFAM) | no GO terms                                    |

hirsutum)" AED:0.08

eAED:0.23

QI:0|0|0.5|1|1|1|2|238|274

|                                    |                                                                                                                                                                                                          |                    |                |              |                               |                                                |
|------------------------------------|----------------------------------------------------------------------------------------------------------------------------------------------------------------------------------------------------------|--------------------|----------------|--------------|-------------------------------|------------------------------------------------|
| <b>Xvis03_22291</b><br><b>1-PA</b> | processed-gene-1.35-mRNA-1<br>protein Name:"Similar to CHLI<br>Magnesium-chelatase subunit<br>ChII, chloroplastic (Oryza<br>sativa subsp. japonica)"<br>AED:0.00 eAED:0.00<br>QI:218 1 1 1 1 1 3 269 418 | 2.711<br>4771<br>3 | 2.6630027<br>5 | 1.80E-<br>06 | IPR0005<br>23<br>(PFAM);      | F:GO:0005524;<br>P:GO:0015995;<br>F:GO:0016851 |
| <b>Xvis03_22132</b><br><b>5-PA</b> | processed-gene-6.29-mRNA-1<br>protein Name:"Similar to<br>B19.4 Late embryogenesis<br>abundant protein B19.4<br>(Hordeum vulgare)" AED:0.16<br>eAED:0.16<br>QI:0 0.66 0.5 0.75 1 1 4 117 18<br>1         | 3.843<br>0709<br>4 | 2.5169091<br>9 | 1.85E-<br>06 | IPR0389<br>56<br>(PFAM)       | no GO terms                                    |
| <b>Xvis03_21289</b><br><b>4-PA</b> | augustus-gene-2.1-mRNA-1<br>protein Name:"Similar to<br>PORB Protochlorophyllide<br>reductase B, chloroplastic<br>(Hordeum vulgare)" AED:0.09<br>eAED:0.09<br>QI:162 1 1 1 1 1 5 457 393                 | 3.051<br>4899<br>9 | 2.1124310<br>9 | 2.74E-<br>06 | IPR0023<br>47<br>(PRINTS<br>) | F:GO:0016630;<br>P:GO:0055114                  |
| <b>Xvis03_22023</b><br><b>9-PA</b> | augustus-gene-8.37-mRNA-1<br>protein Name:"Similar to Late<br>embryogenesis abundant protein<br>Dc3 (Daucus carota)" AED:0.00<br>eAED:0.00<br>QI:288 1 1 1 1 1 2 197 146                                 | 3.705<br>5560<br>5 | 2.6248538<br>4 | 3.81E-<br>06 |                               | no GO terms                                    |
| <b>Xvis03_22059</b><br><b>7-PA</b> | processed-gene-1.22-mRNA-1<br>protein Name:"Similar to<br>RAB18 Dehydrin Rab18<br>(Arabidopsis thaliana)"<br>AED:0.00 eAED:0.00<br>QI:228 1 1 1 1 1 2 308 136                                            | 7.330<br>6810<br>4 | 1.8180899<br>3 | 5.89E-<br>06 | IPR0001<br>67<br>(PFAM)       | P:GO:0009415                                   |
| <b>Xvis03_22156</b><br><b>4-PA</b> | augustus-gene-1.8-mRNA-1<br>protein Name:"Similar to Late<br>embryogenesis abundant<br>protein D-34 (Gossypium<br>hirsutum)" AED:0.08<br>eAED:0.23<br>QI:0 0 0.5 1 1 1 2 238 274                         | 2.208<br>2565<br>1 | 3.0839240<br>5 | 6.38E-<br>06 | IPR0070<br>11<br>(PFAM)       | no GO terms                                    |

|                                    |                                                                                                                                                                                                                                              |                    |                |              |                         |              |
|------------------------------------|----------------------------------------------------------------------------------------------------------------------------------------------------------------------------------------------------------------------------------------------|--------------------|----------------|--------------|-------------------------|--------------|
| <b>Xvis03_22024</b><br><b>0-PA</b> | augustus-gene-8.38-mRNA-1<br>protein Name:"Similar to<br>LEA3 Late embryogenesis<br>abundant protein, group 3<br>(Oryza sativa subsp. indica)"<br>AED:0.00 eAED:0.00<br>QI:193 1 1 1 1 2 266 174                                             | 7.289<br>2394<br>1 | 2.2979556<br>4 | 8.88E-<br>06 |                         | no GO terms  |
| <b>Xvis03_22079</b><br><b>0-PA</b> | augustus-gene-7.89-mRNA-1<br>protein Name:"Similar to<br>SYNPCC7002_A1590<br>Uncharacterized protein<br>SYNPCC7002_A1590<br>(Synechococcus sp. (strain<br>ATCC 27264 / PCC 7002 / PR-<br>6))" AED:0.04 eAED:0.04<br>QI:148 1 1 1 1 6 744 229 | 1.305<br>2415<br>1 | 3.2089502      | 9.54E-<br>06 | IPR0189<br>71<br>(PFAM) | no GO terms  |
| <b>Xvis03_22125</b><br><b>2-PA</b> | augustus-gene-6.27-mRNA-1<br>protein Name:"Similar to<br>SPG20 Spartina (Homo<br>sapiens)" AED:0.04<br>eAED:0.04<br>QI:93 1 1 1 0.75 0.6 5 21 403                                                                                            | 2.680<br>1088<br>5 | 2.6318819<br>5 | 1.13E-<br>05 | IPR0096<br>86<br>(PFAM) | no GO terms  |
| <b>Xvis03_22156</b><br><b>4-PA</b> | augustus-gene-1.8-mRNA-1<br>protein Name:"Similar to Late<br>embryogenesis abundant<br>protein D-34 (Gossypium<br>hirsutum)" AED:0.08<br>eAED:0.23<br>QI:0 0 0.5 1 1 1 2 238 274                                                             | 1.785<br>8015<br>6 | 2.8897096<br>7 | 1.70E-<br>05 | IPR0070<br>11<br>(PFAM) | no GO terms  |
| <b>Xvis03_21811</b><br><b>7-PA</b> | augustus-gene-11.3-mRNA-1<br>protein Name:"Similar to<br>Embryonic protein DC-8<br>(Daucus carota)" AED:0.04<br>eAED:0.04<br>QI:0 1 0.66 1 1 1 3 517 510                                                                                     | 4.669<br>8475<br>7 | 2.5189818<br>7 | 1.74E-<br>05 |                         | P:GO:0009737 |
| <b>Xvis03_22553</b><br><b>2-PA</b> | processed-gene-0.13-mRNA-1<br>protein Name:"Similar to<br>DHN3 Dehydrin DHN3<br>(Hordeum vulgare)" AED:0.00<br>eAED:0.00<br>QI:270 1 1 1 1 2 257 183                                                                                         | 6.481<br>0301<br>9 | 1.8897771<br>5 | 2.04E-<br>05 | IPR0001<br>67<br>(PFAM) | P:GO:0009415 |
| <b>Xvis03_20208</b><br><b>7-PA</b> | augustus-gene-8.14-mRNA-1<br>protein Name:"Similar to<br>AAE3 Oxalate--CoA ligase                                                                                                                                                            | 2.212<br>3689<br>3 | 2.6573145<br>4 | 5.13E-<br>05 | IPR0008<br>73<br>(PFAM) | F:GO:0003824 |

(Arabidopsis thaliana)"

AED:0.02 eAED:0.02

QI:521|1|1|1|1|1|4|258|517

|                                    |                                                                                                                                                                                                             |                    |                |                 |                         |                                                                                                   |
|------------------------------------|-------------------------------------------------------------------------------------------------------------------------------------------------------------------------------------------------------------|--------------------|----------------|-----------------|-------------------------|---------------------------------------------------------------------------------------------------|
| <b>Xvis03_20400</b><br><b>3-PA</b> | augustus-gene-27.86-mRNA-1<br>protein Name:"Similar to<br>Aldose reductase (Hordeum<br>vulgare)" AED:0.09 eAED:0.09<br>QI:204 1 1 1 1 1 9 270 319                                                           | 3.174<br>4073      | 2.1372464<br>2 | 6.79E-<br>05    | IPR0204<br>71           | F:GO:0016491;<br>P:GO:0055114                                                                     |
| <b>Xvis03_20359</b><br><b>2-PA</b> | augustus-gene-31.41-mRNA-1<br>protein Name:"Similar to 1-<br>Cys peroxiredoxin (Medicago<br>truncatula)" AED:0.00<br>eAED:0.00<br>QI:253 1 1 1 1 1 2 509 219                                                | 9.703<br>8722<br>4 | 1.3351265      | 7.04E-<br>05    | IPR0008<br>66           | F:GO:0016209;<br>F:GO:0016491;<br>P:GO:0045454;<br>F:GO:0051920;<br>P:GO:0055114                  |
| <b>Xvis03_20503</b><br><b>4-PA</b> | late embryogenesis abundant<br>protein D-34-like                                                                                                                                                            | 1.195<br>8591<br>4 | 3.0903517<br>3 | 7.65E-<br>05    | IPR0070<br>11<br>(PFAM) | no GO terms                                                                                       |
| <b>Xvis03_22024</b><br><b>0-PA</b> | augustus-gene-8.38-mRNA-1<br>protein Name:"Similar to<br>LEA3 Late embryogenesis<br>abundant protein, group 3<br>(Oryza sativa subsp. indica)"<br>AED:0.00 eAED:0.00<br>QI:193 1 1 1 1 1 2 266 174          | 13.17<br>9127<br>6 | 1.9179068<br>9 | 7.91E-<br>05    |                         | no GO terms                                                                                       |
| <b>Xvis03_22059</b><br><b>7-PA</b> | processed-gene-1.22-mRNA-1<br>protein Name:"Similar to<br>RAB18 Dehydrin Rab18<br>(Arabidopsis thaliana)"<br>AED:0.00 eAED:0.00<br>QI:228 1 1 1 1 1 2 308 136                                               | 4.645<br>2791<br>6 | 2.0413783<br>3 | 8.67E-<br>05    | IPR0001<br>67<br>(PFAM) | P:GO:0009415                                                                                      |
| <b>Xvis03_22000</b><br><b>2-PA</b> | processed-gene-8.116-mRNA-<br>1 protein Name:"Similar to<br>Desiccation-related protein<br>PCC3-06 (Craterostigma<br>plantagineum)" AED:0.00<br>eAED:0.00<br>QI:334 1 1 1 1 1 2 386 231                     | 25.90<br>4908<br>3 | 1.6696899<br>1 | 0.0001<br>35873 |                         | no GO terms                                                                                       |
| <b>Xvis03_22172</b><br><b>0-PA</b> | augustus-gene-5.43-mRNA-1<br>protein Name:"Similar to EIF-<br>5A2 Eukaryotic translation<br>initiation factor 5A-2<br>(Nicotiana plumbaginifolia)"<br>AED:0.05 eAED:0.05<br>QI:177 1 1 1 0.8 0.66 6 330 160 | 2.183<br>5228      | 2.0957290<br>1 | 0.0001<br>60339 | IPR0201<br>89<br>(PFAM) | F:GO:0003723;<br>F:GO:0003746;<br>P:GO:0006452;<br>F:GO:0043022;<br>P:GO:0045901;<br>P:GO:0045905 |



|                                    |                                                                                                                                                                                                    |                    |                |                 |                                |                               |
|------------------------------------|----------------------------------------------------------------------------------------------------------------------------------------------------------------------------------------------------|--------------------|----------------|-----------------|--------------------------------|-------------------------------|
| <b>Xvis03_22345</b><br><b>4-PA</b> | processed-gene-3.78-mRNA-1<br>protein Name:"Similar to<br>PCKR1 Peptidyl-prolyl cis-<br>trans isomerase (Catharanthus<br>roseus)" AED:0.02 eAED:0.02<br>QI:0 -1 0 1 -1 1 1 0 173                   | 7.480<br>9848<br>9 | 1.2664219<br>9 | 0.0001<br>63465 | IPR0021<br>30                  | P:GO:0000413;<br>F:GO:0003755 |
| <b>Xvis03_21191</b><br><b>7-PA</b> | augustus-gene-8.2-mRNA-1<br>protein Name:"Similar to<br>UGT78D2 UDP-<br>glycosyltransferase 78D2<br>(Arabidopsis thaliana)"<br>AED:0.00 eAED:0.00<br>QI:173 1 1 1 1 1 2 210 454                    | 1.696<br>6120<br>4 | 2.7851324<br>4 | 0.0001<br>6923  | IPR0022<br>13<br>(PFAM);       | F:GO:0016758                  |
| <b>Xvis03_22125</b><br><b>2-PA</b> | augustus-gene-6.27-mRNA-1<br>protein Name:"Similar to<br>SPG20 Spartina (Homo<br>sapiens)" AED:0.04<br>eAED:0.04<br>QI:93 1 1 1 0.75 0.6 5 21 403                                                  | 1.188<br>6259      | 2.8708791<br>4 | 0.0001<br>84897 | IPR0096<br>86<br>(PFAM)        | no GO terms                   |
| <b>Xvis03_21080</b><br><b>2-PA</b> | processed-gene-9.8-mRNA-1<br>protein Name:"Similar to<br>LTI65 Low-temperature-<br>induced 65 kDa protein<br>(Arabidopsis thaliana)"<br>AED:0.00 eAED:0.00<br>QI:247 1 1 1 1 1 5 289 574           | 18.10<br>5578<br>8 | 1.9090698<br>6 | 0.0002<br>02692 | IPR0374<br>91<br>(PANTH<br>ER) | P:GO:0009737                  |
| <b>Xvis03_22156</b><br><b>4-PA</b> | augustus-gene-1.8-mRNA-1<br>protein Name:"Similar to Late<br>embryogenesis abundant<br>protein D-34 (Gossypium<br>hirsutum)" AED:0.08<br>eAED:0.23<br>QI:0 0 0.5 1 1 1 2 238 274                   | 0.970<br>1643<br>4 | 2.8166717<br>7 | 0.0002<br>27483 | IPR0070<br>11<br>(PFAM)        | no GO terms                   |
| <b>Xvis03_22519</b><br><b>9-PA</b> | processed-gene-0.101-mRNA-<br>1 protein Name:"Similar to<br>Aldose reductase (Hordeum<br>vulgare)" AED:0.14<br>eAED:0.14<br>QI:154 0.87 0.88 1 0.62 0.55 9 <br>25 337                              | 6.855<br>5564<br>5 | 1.6145377<br>6 | 0.0002<br>30193 | IPR0204<br>71                  | F:GO:0016491;<br>P:GO:0055114 |
| <b>Xvis03_22024</b><br><b>0-PA</b> | augustus-gene-8.38-mRNA-1<br>protein Name:"Similar to<br>LEA3 Late embryogenesis<br>abundant protein, group 3<br>(Oryza sativa subsp. indica)"<br>AED:0.00 eAED:0.00<br>QI:193 1 1 1 1 1 2 266 174 | 10.71<br>7152<br>8 | 2.5468819<br>3 | 0.0002<br>31897 |                                | no GO terms                   |
| <b>Xvis03_20965</b><br><b>3-PA</b> | processed-gene-17.23-mRNA-<br>1 protein Name:"Similar to<br>Os01g0270100 Cysteine<br>proteinase inhibitor 12 (Oryza<br>sativa subsp. japonica)"<br>AED:0.07 eAED:0.07<br>QI:0 0 0 1 1 1 4 0 225    | 6.033<br>7838<br>4 | 1.2914246<br>1 | 0.0002<br>94989 |                                | F:GO:0004869                  |

|                                    |                                                                                                                                                                                                               |                    |                |                 |                                        |                                                                                                   |
|------------------------------------|---------------------------------------------------------------------------------------------------------------------------------------------------------------------------------------------------------------|--------------------|----------------|-----------------|----------------------------------------|---------------------------------------------------------------------------------------------------|
| <b>Xvis03_21437</b><br><b>2-PA</b> | processed-gene-6.62-mRNA-1<br>protein Name:"Similar to<br>Eukaryotic translation<br>initiation factor 5A (Manihot<br>esculenta)" AED:0.20<br>eAED:0.20<br>QI:188 1 1 0.8 0.66 6 353 159                       | 2.367<br>6169<br>7 | 1.9349514<br>2 | 0.0003<br>35124 | IPR0201<br>89<br>(PFAM                 | F:GO:0003723;<br>F:GO:0003746;<br>P:GO:0006452;<br>F:GO:0043022;<br>P:GO:0045901;<br>P:GO:0045905 |
| <b>Xvis03_21763</b><br><b>8-PA</b> | augustus-gene-2.63-mRNA-1<br>protein Name:"Similar to<br>CCR1 Cinnamoyl-CoA<br>reductase 1 (Arabidopsis<br>thaliana)" AED:0.07<br>eAED:0.07<br>QI:0 0 0 1 1 1 6 0 324                                         | 1.429<br>2214<br>2 | 2.6004215<br>5 | 0.0003<br>62868 | IPR0362<br>91<br>(SUPER<br>FAMILY<br>) | F:GO:0003824;<br>F:GO:0050662                                                                     |
| <b>Xvis03_20101</b><br><b>5-PA</b> | augustus-gene-109.105-<br>mRNA-1 protein<br>Name:"Similar to MSRB5<br>Peptide methionine sulfoxide<br>reductase B5 (Oryza sativa<br>subsp. japonica)" AED:0.11<br>eAED:0.11<br>QI:31 0.33 0.5 1 1 1 4 790 250 | 1.020<br>0315<br>3 | 2.5950097<br>1 | 0.0004<br>19649 | IPR0025<br>79<br>(PFAM                 | P:GO:0006979;<br>F:GO:0016671;<br>P:GO:0030091;<br>F:GO:0033743;<br>P:GO:0055114                  |
| <b>Xvis03_22377</b><br><b>4-PA</b> | augustus-gene-3.64-mRNA-1<br>protein Name:"Similar to<br>LEA14-A Late embryogenesis<br>abundant protein Lea14-A<br>(Gossypium hirsutum)"<br>AED:0.40 eAED:0.40<br>QI:0 0 0 1 1 1 2 0 155                      | 2.609<br>5367<br>3 | 2.0846299<br>4 | 0.0004<br>31468 | IPR0048<br>64<br>(PFAM);               | no GO terms                                                                                       |
| <b>Xvis03_20964</b><br><b>3-PA</b> | processed-gene-16.29-mRNA-1<br>protein Name:"Similar to<br>ERF1-3 Eukaryotic peptide<br>chain release factor subunit 1-3<br>(Arabidopsis thaliana)"<br>AED:0.00 eAED:0.00 QI:0 -<br>1 0 1 -1 1 1 0 437        | 0.995<br>3838<br>5 | 2.6770971<br>3 | 0.0004<br>56625 | IPR0051<br>42<br>(PFAM);               | F:GO:0003747;<br>C:GO:0005737;<br>P:GO:0006415                                                    |
| <b>Xvis03_22229</b><br><b>2-PA</b> | processed-gene-3.63-mRNA-1<br>protein Name:"Similar to<br>CML18 Probable calcium-<br>binding protein CML18<br>(Oryza sativa subsp. japonica)"<br>AED:0.02 eAED:0.02 QI:0 -<br>1 0 1 -1 1 1 0 161              | 0.970<br>7048<br>7 | 2.6432039<br>4 | 0.0005<br>02823 | IPR0020<br>48<br>(PFAM);               | F:GO:0005509                                                                                      |
| <b>Xvis03_20620</b><br><b>2-PA</b> | processed-gene-9.17-mRNA-1<br>protein Name:"Similar to<br>GMPM1 18 kDa seed<br>maturation protein (Glycine<br>max)" AED:0.23 eAED:0.23<br>QI:0 -1 0 1 -1 1 1 0 132                                            | 0.775<br>8309<br>1 | 2.5885541<br>6 | 0.0007<br>67778 | IPR0055<br>13<br>(PFAM)                | P:GO:0009793                                                                                      |
| <b>Xvis03_22345</b><br><b>1-PA</b> | processed-gene-3.71-mRNA-1<br>protein Name:"Similar to<br>CSP1 Cold shock protein 1<br>(Arabidopsis thaliana)"<br>AED:0.30 eAED:0.30 QI:0 -<br>1 0 1 -1 1 1 0 215                                             | 1.654<br>539       | 2.1634965<br>3 | 0.0009<br>62503 | IPR0020<br>59<br>(PFAM)                | F:GO:0003676;<br>F:GO:0008270                                                                     |
| <b>Xvis03_20746</b><br><b>6-PA</b> | augustus-gene-21.70-mRNA-1<br>protein Name:"Similar to FLK<br>Flowering locus K homology<br>domain (Arabidopsis<br>thaliana)" AED:0.22<br>eAED:0.22<br>QI:168 0.83 0.85 1 0.83 0.71 7 <br>306 448             | 1.680<br>7551<br>6 | 1.9600575<br>6 | 0.0011<br>55202 |                                        | F:GO:0003723                                                                                      |

|                                    |                                                                                                                                                                                                              |                    |                |                 |                         |                                                                                                   |
|------------------------------------|--------------------------------------------------------------------------------------------------------------------------------------------------------------------------------------------------------------|--------------------|----------------|-----------------|-------------------------|---------------------------------------------------------------------------------------------------|
| <b>Xvis03_20265</b><br><b>5-PA</b> | processed-gene-53.13-mRNA-1<br>protein Name:"Similar to<br>CCT2 Choline-phosphate<br>cytidyltransferase 2<br>(Arabidopsis thaliana)"<br>AED:0.15 eAED:0.15<br>QI:50 1 1 1 1 8 392 291                        | 0.988<br>0117<br>4 | 2.4340105<br>7 | 0.0014<br>52068 | IPR0048<br>21<br>(PFAM) | F:GO:0003824;<br>P:GO:0009058                                                                     |
| <b>Xvis03_20818</b><br><b>2-PA</b> | processed-gene-16.15-mRNA-1<br>protein Name:"Similar to<br>EIF-5A2 Eukaryotic<br>translation initiation factor 5A-<br>2 (Nicotiana plumbaginifolia)"<br>AED:0.11 eAED:0.11<br>QI:80 1 1 1 0.8 0.66 6 225 159 | 2.978<br>6649<br>2 | 1.4767503<br>2 | 0.0015<br>20635 | IPR0018<br>84           | F:GO:0003723;<br>F:GO:0003746;<br>P:GO:0006452;<br>F:GO:0043022;<br>P:GO:0045901;<br>P:GO:0045905 |
| <b>Xvis03_22059</b><br><b>9-PA</b> | augustus-gene-1.77-mRNA-1<br>protein Name:"Similar to<br>DHN1 Dehydrin DHN1<br>(Hordeum vulgare)" AED:0.00<br>eAED:0.00<br>QI:161 1 1 1 1 1 2 370 123                                                        | 1.288<br>1543<br>5 | 2.1546031<br>4 | 0.0016<br>07037 | IPR0001<br>67<br>(PFAM) | P:GO:0009415                                                                                      |
| <b>Xvis03_20722</b><br><b>0-PA</b> | augustus-gene-29.99-mRNA-1<br>protein Name:"Similar to<br>Bowman-Birk type trypsin<br>inhibitor (Triticum aestivum)"<br>AED:0.14 eAED:0.14<br>QI:36 1 1 1 1 1 2 205 120                                      | 1.355<br>7005<br>2 | 2.1856071<br>5 | 0.0019<br>60747 | IPR0008<br>77<br>(PFAM) | F:GO:0004867;<br>C:GO:0005576                                                                     |
| <b>Xvis03_22248</b><br><b>7-PA</b> | processed-gene-2.59-mRNA-1<br>protein Name:"Similar to<br>At4g22670 FAM10 family<br>protein At4g22670<br>(Arabidopsis thaliana)"<br>AED:0.11 eAED:0.11<br>QI:137 0.9 0.90 1 1 1 1 173 36<br>2                | 1.211<br>8746      | 2.0962292<br>1 | 0.0020<br>77646 | IPR0346<br>49<br>(PFAM) | F:GO:0005515;<br>F:GO:0046983                                                                     |
| <b>Xvis03_21811</b><br><b>7-PA</b> | augustus-gene-11.3-mRNA-1<br>protein Name:"Similar to<br>Embryonic protein DC-8<br>(Daucus carota)" AED:0.04<br>eAED:0.04<br>QI:0 1 0.66 1 1 1 3 517 510                                                     | 11.15<br>6628<br>1 | 2.0199206      | 0.0021<br>20582 |                         | P:GO:0009737                                                                                      |
| <b>Xvis03_22135</b><br><b>4-PA</b> | augustus-gene-2.78-mRNA-1<br>protein Name:"Similar to<br>RPS12 40S ribosomal protein<br>S12 (Hordeum vulgare)"<br>AED:0.26 eAED:0.26<br>QI:0 1 0.75 1 1 1 4 274 184                                          | 0.933<br>5730<br>1 | 2.3374963<br>8 | 0.0023<br>43013 | IPR0040<br>38<br>(PFAM) | F:GO:0003735;<br>C:GO:0005840;<br>P:GO:0006412                                                    |
| <b>Xvis03_20721</b><br><b>0-PA</b> | augustus-gene-28.48-mRNA-1<br>protein Name:"Similar to<br>CLPB3 Chaperone protein<br>ClpB3, mitochondrial (Oryza<br>sativa subsp. japonica)"<br>AED:0.12 eAED:0.12<br>QI:139 1 1 1 1 1 10 182 968            | 3.191<br>2218<br>2 | 1.7187871<br>8 | 0.0024<br>14538 | IPR0039<br>59<br>(PFAM) | F:GO:0005524;<br>C:GO:0005737;<br>P:GO:0009408;<br>P:GO:0019538;<br>P:GO:0042026                  |
| <b>Xvis03_21377</b><br><b>2-PA</b> | processed-gene-11.46-mRNA-1<br>protein Name:"Similar to<br>MT4A Metallothionein-like<br>protein 4A (Oryza sativa subsp.                                                                                      | 0.667<br>6822      | 2.3806776<br>9 | 0.0024<br>96221 | IPR0003<br>47<br>(PFAM) | F:GO:0046872                                                                                      |

|                     |                                 |                    |           |        |         |               |
|---------------------|---------------------------------|--------------------|-----------|--------|---------|---------------|
|                     | japonica)"                      | AED:0.00           |           |        |         |               |
|                     | eAED:0.00                       |                    |           |        |         |               |
|                     | QI:173 1 1 1 1 1 2 379 80       |                    |           |        |         |               |
| <b>Xvis03_21556</b> | augustus-gene-5.91-mRNA-1       | 12.65              | 1.0636296 | 0.0026 | IPR0017 | F:GO:0004089; |
| <b>9-PA</b>         | protein Name:"Similar to        | 2092               | 2         | 88392  | 65      | F:GO:0008270  |
|                     | Carbonic anhydrase,             | 3                  |           |        | (PFAM   |               |
|                     | chloroplastic (Hordeum          |                    |           |        |         |               |
|                     | vulgare)"                       | AED:0.12           |           |        |         |               |
|                     | eAED:0.12                       |                    |           |        |         |               |
|                     | QI:674 1 1 1 1 1 8 205 260      |                    |           |        |         |               |
| <b>Xvis03_21633</b> | processed-gene-6.102-mRNA-      | 2.142              | 1.7195160 | 0.0030 | IPR0021 | F:GO:0003824; |
| <b>0-PA</b>         | 1 protein Name:"Similar to      | 1563               | 1         | 16808  | 55      | F:GO:0016747  |
|                     | PED1 3-ketoacyl-CoA thiolase    | 1                  |           |        |         |               |
|                     | 2, peroxisomal (Arabidopsis     |                    |           |        |         |               |
|                     | thaliana)"                      | AED:0.14           |           |        |         |               |
|                     | eAED:0.14                       |                    |           |        |         |               |
|                     | QI:702 0.85 0.93 0.93 1 1 15 19 |                    |           |        |         |               |
|                     | 04 479                          |                    |           |        |         |               |
| <b>Xvis03_20047</b> | processed-gene-61.44-mRNA-      | 1.360              | 2.1990004 | 0.0025 | IPR0119 | F:GO:0005515  |
| <b>3-PA</b>         | 1 protein Name:"Similar to      | 5723               | 6         | 49607  | 90      |               |
|                     | HOP3 Hsp70-Hsp90                | 6                  |           |        |         |               |
|                     | organizing protein 3            |                    |           |        |         |               |
|                     | (Arabidopsis thaliana)"         |                    |           |        |         |               |
|                     | AED:0.09 eAED:0.09              |                    |           |        |         |               |
|                     | QI:150 1 1 1 1 1 7 289 574      |                    |           |        |         |               |
| <b>Xvis03_21289</b> | augustus-gene-2.1-mRNA-1        | 0.863              | 2.2836327 | 0.0026 | IPR0023 | F:GO:0016630; |
| <b>4-PA</b>         | protein Name:"Similar to        | 6714               | 1         | 17543  | 47      | P:GO:0055114  |
|                     | PORB Protochlorophyllide        | 2                  |           |        |         |               |
|                     | reductase B, chloroplastic      |                    |           |        |         |               |
|                     | (Hordeum vulgare)"              | AED:0.09           |           |        |         |               |
|                     | eAED:0.09                       |                    |           |        |         |               |
|                     | QI:162 1 1 1 1 1 5 457 393      |                    |           |        |         |               |
| <b>Xvis03_21997</b> | processed-gene-5.16-mRNA-1      | 2.192              | 1.8584482 | 0.0035 | IPR0055 | P:GO:0009793  |
| <b>9-PA</b>         | protein Name:"Similar to        | 7572               | 8         | 30214  | 13      |               |
|                     | GMPM1 18 kDa seed               | 5                  |           |        | (PFAM)  |               |
|                     | maturation protein (Glycine     |                    |           |        |         |               |
|                     | max)"                           | AED:0.00 eAED:0.00 |           |        |         |               |
|                     | QI:97 1 1 1 1 1 2 370 156       |                    |           |        |         |               |
| <b>Xvis03_22314</b> | processed-gene-3.56-mRNA-1      | 11.93              | 0.8845895 | 0.0035 | IPR0246 | no GO terms   |
| <b>4-PA</b>         | protein Name:"Similar to        | 7209               | 1         | 78017  | 81      |               |
|                     | RBCS1 Ribulose biphosphate      |                    |           |        |         |               |
|                     | carboxylase small chain,        |                    |           |        |         |               |
|                     | chloroplastic (Musa             |                    |           |        |         |               |

|                    |                                 |          |           |        |         |               |
|--------------------|---------------------------------|----------|-----------|--------|---------|---------------|
|                    | acuminata)"                     | AED:0.05 |           |        |         |               |
|                    | eAED:0.05                       |          |           |        |         |               |
|                    | QI:145 1 1 1 1 1 3 356 174      |          |           |        |         |               |
| <b>Xvis03_2212</b> | augustus-gene-4.54-mRNA-1       | 2.184    | 1.6302500 | 0.0038 | IPR0077 | no GO terms   |
| <b>3 6-PA</b>      | protein Name:"Similar to PXG    | 4627     | 3         | 80978  | 36      |               |
|                    | Peroxygenase (Oryza sativa      |          |           |        | (PFAM); |               |
|                    | subsp. japonica)"               | AED:0.38 |           |        |         |               |
|                    | eAED:0.38                       |          |           |        |         |               |
|                    | QI:85 0.66 0.85 1 1 7 299       |          |           |        |         |               |
|                    | 316                             |          |           |        |         |               |
| <b>Xvis03_2029</b> | augustus-gene-28.13-mRNA-1      | 0.785    | 2.2752088 | 0.0038 | IPR0415 | F:GO:0005524; |
| <b>5 4-PA</b>      | protein Name:"Similar to RPT1   | 8625     | 1         | 97195  | 69      | C:GO:0005737; |
|                    | 26S protease regulatory subunit | 2        |           |        | (PFAM)  | F:GO:0016787; |
|                    | 7 (Prunus persica)"             | AED:0.05 |           |        |         | P:GO:0030163  |
|                    | eAED:0.05                       |          |           |        |         |               |
|                    | QI:150 1 1 1 1 1 10 313 427     |          |           |        |         |               |
| <b>Xvis03_2052</b> | processed-gene-22.101-          | 0.748    | 2.2392879 | 0.0041 | IPR0001 | P:GO:0009415  |
| <b>3 2-PA</b>      | mRNA-1 protein                  | 8657     | 2         | 90054  | 67      |               |
|                    | Name:"Similar to DHN1           |          |           |        | (PFAM)  |               |
|                    | Dehydrin DHN1 (Hordeum          |          |           |        |         |               |
|                    | vulgare)"                       | AED:0.36 |           |        |         |               |
|                    | eAED:0.36                       |          |           |        |         |               |
|                    | QI:115 1 1 1 1 1 2 350 132      |          |           |        |         |               |
| <b>Xvis03_2083</b> | desiccation-related protein     | 14.19    | 1.0339301 | 0.0042 | PF13668 | no GO terms   |
| <b>2 8-PA</b>      | PCC13-62-like                   | 7445     |           | 3904   | (PFAM)  |               |
|                    |                                 | 7        |           |        |         |               |
| <b>Xvis03_2246</b> | processed-gene-1.62-mRNA-1      | 0.790    | 2.1774229 | 0.0046 | IPR0060 | F:GO:0003735; |
| <b>6 0-PA</b>      | protein Name:"Similar to FEN1   | 0292     | 6         | 13511  | 84      | F:GO:0004518; |
|                    | Flap endonuclease 1 (Zea        | 6        |           |        | (PRINTS | C:GO:0005840; |
|                    | mays)"                          | AED:0.25 |           |        | )       | P:GO:0006281; |
|                    | eAED:0.26                       |          |           |        |         | P:GO:0006412; |
|                    | QI:20 0.7 0.71 0.95 1 1 21 362  |          |           |        |         | F:GO:0016788  |
|                    | 621                             |          |           |        |         |               |
| <b>Xvis03_2053</b> | augustus-gene-34.43-mRNA-1      | 0.713    | 2.1407999 | 0.0055 | IPR0003 | F:GO:0046872  |
| <b>6 7-PA</b>      | protein Name:"Similar to MTA    | 2959     | 9         | 63873  | 47      |               |
|                    | Metallothionein-like protein 1  | 4        |           |        | (PFAM); |               |
|                    | (Pisum sativum)"                | AED:0.00 |           |        |         |               |
|                    | eAED:0.00                       |          |           |        |         |               |
|                    | QI:175 1 1 1 1 1 2 359 83       |          |           |        |         |               |
| <b>Xvis03_2190</b> | augustus-gene-7.46-mRNA-1       | 3.129    | 1.2722804 | 0.0062 | IPR0346 | F:GO:0005515; |
| <b>5 5-PA</b>      | protein Name:"Similar to TDX    | 9734     | 5         | 35578  | 49      | F:GO:0046983  |
|                    | TPR repeat-containing           | 9        |           |        | (PFAM)  |               |
|                    | thioredoxin TDX (Arabidopsis    |          |           |        |         |               |
|                    | thaliana)"                      | AED:0.04 |           |        |         |               |
|                    | eAED:0.04                       |          |           |        |         |               |

QI:262|1|1|1|1|1|1|1|486|390

|                                     |                                                                                                                                                                                                                |                    |                |                 |                               |                                                                                                   |
|-------------------------------------|----------------------------------------------------------------------------------------------------------------------------------------------------------------------------------------------------------------|--------------------|----------------|-----------------|-------------------------------|---------------------------------------------------------------------------------------------------|
| <b>Xvis03_2200</b><br><b>7 6-PA</b> | augustus-gene-4.88-mRNA-1<br>protein Name:"Similar to<br>GDCHS Glycine cleavage<br>system H protein,<br>mitochondrial (Oryza sativa<br>subsp. japonica)" AED:0.04<br>eAED:0.04<br>QI:127 1 1 1 1 1 1 4 484 165 | 1.846<br>7886<br>2 | 1.5457459<br>2 | 0.0063<br>44124 | IPR0174<br>53                 | C:GO:0005960;<br>P:GO:0019464                                                                     |
| <b>Xvis03_2040</b><br><b>2 2-PA</b> | processed-gene-29.69-mRNA-<br>1 protein Name:"Similar to<br>RANBP1C Ran-binding protein<br>1 homolog c (Arabidopsis<br>thaliana)" AED:0.01 eAED:0.01<br>QI:85 1 1 1 1 1 1 4 338 224                            | 1.286<br>7017<br>4 | 1.8266814<br>7 | 0.0067<br>95094 | IPR0001<br>56<br>(PFAM)       | P:GO:0046907                                                                                      |
| <b>Xvis03_2165</b><br><b>1 5-PA</b> | augustus-gene-8.70-mRNA-1<br>protein Name:"Similar to<br>SAPK7 Serine/threonine-<br>protein kinase SAPK7 (Oryza<br>sativa subsp. japonica)"<br>AED:0.12 eAED:0.12<br>QI:115 0.83 1 1 1 1 7 226 305             | 1.408<br>9568<br>1 | 1.8659521<br>3 | 0.0070<br>1349  | IPR0110<br>09                 | F:GO:0004672;<br>F:GO:0005524;<br>P:GO:0006468                                                    |
| <b>Xvis03_2055</b><br><b>1 2-PA</b> | processed-gene-10.28-mRNA- 1<br>protein Name:"Similar to Hsp83<br>Heat shock protein 83<br>(Drosophila melanogaster)"<br>AED:0.12 eAED:0.12<br>QI:147 1 1 1 1 1 1 19 333 803                                   | 5.926<br>4619<br>8 | 1.0987413<br>5 | 0.0079<br>85264 | IPR0205<br>75<br>(PRINTS      | F:GO:0005524;<br>P:GO:0006457;<br>F:GO:0051082                                                    |
| <b>Xvis03_2154</b><br><b>3 4-PA</b> | augustus-gene-6.51-mRNA-1<br>protein Name:"Similar to<br>Os01g0253300 Importin subunit<br>alpha-1a (Oryza sativa subsp.<br>japonica)" AED:0.21<br>eAED:0.21<br>QI:191 0.81 0.75 1 1 1 12 0 614                 | 0.592<br>3643<br>7 | 2.0794711<br>8 | 0.0083<br>24319 | IPR0119<br>89 (               | F:GO:0005515;<br>C:GO:0005634;<br>C:GO:0005737;<br>P:GO:0006606;<br>F:GO:0008565;<br>F:GO:0061608 |
| <b>Xvis03_2250</b><br><b>4 2-PA</b> | augustus-gene-0.56-mRNA-1<br>protein Name:"Similar to CSD2<br>Superoxide dismutase [Cu-Zn]<br>2, chloroplastic (Arabidopsis<br>thaliana)" AED:0.13 eAED:0.13<br>QI:217 0.85 0.87 1 1 1 8 225 22 6              | 10.89<br>4930<br>1 | 0.7706707<br>3 | 0.0085<br>11462 | IPR0014<br>24<br>(PRINTS<br>) | P:GO:0006801;<br>F:GO:0046872                                                                     |

|                                     |                                                                                                                                                                                                      |                    |                |                 |                               |                                                                 |
|-------------------------------------|------------------------------------------------------------------------------------------------------------------------------------------------------------------------------------------------------|--------------------|----------------|-----------------|-------------------------------|-----------------------------------------------------------------|
| <b>Xvis03_2212</b><br><b>3 6-PA</b> | augustus-gene-4.54-mRNA-1<br>protein Name:"Similar to PXG<br>Peroxygenase (Oryza sativa<br>subsp. japonica)" AED:0.38<br>eAED:0.38<br>QI:85 0.66 0.85 0.85 1 1 7 299 <br>316                         | 2.138<br>1232<br>1 | 1.5111337      | 0.0093<br>16845 | IPR0077<br>36<br>(PFAM)       | no GO terms                                                     |
| <b>Xvis03_2248</b><br><b>8 7-PA</b> | augustus-gene-0.36-mRNA-1<br>protein Name:"Similar to<br>At4g12130 Putative<br>transferase At4g12130,<br>mitochondrial (Arabidopsis<br>thaliana)" AED:0.05<br>eAED:0.05<br>QI:50 1 1 1 1 1 5 427 411 | 1.726<br>6701      | 1.545695       | 0.0102<br>31088 | IPR0177<br>03                 | F:GO:0005515                                                    |
| <b>Xvis03_2103</b><br><b>3 7-PA</b> | augustus-gene-8.1-mRNA-1<br>protein Name:"Similar to<br>RPS12 40S ribosomal protein<br>S12 (Hordeum vulgare)"<br>AED:0.38 eAED:0.38<br>QI:0 1 0.75 1 1 1 4 393 161                                   | 0.788<br>9782<br>9 | 2.0046668<br>6 | 0.0104<br>36181 | IPR0005<br>30<br>(PRINTS      | F:GO:0003735;<br>C:GO:0005840;<br>P:GO:0006412                  |
| <b>Xvis03_2125</b><br><b>2 0-PA</b> | augustus-gene-6.14-mRNA-1<br>protein Name:"Similar to<br>TUF1B Elongation factor Tu,<br>chloroplastic (Glycine max)"<br>AED:0.04 eAED:0.16<br>QI:0 0 0.5 1 1 1 2 351 455                             | 4.598<br>5812      | 0.9845974<br>2 | 0.0125<br>95747 | IPR0007<br>95<br>(PRINTS<br>) | F:GO:0003746;<br>F:GO:0003924;<br>F:GO:0005525;<br>P:GO:0006414 |
| <b>Xvis03_2197</b><br><b>8 4-PA</b> | processed-gene-6.0-mRNA-1<br>protein Name:"Similar to<br>MBF1B Multiprotein-bridging<br>factor 1b (Arabidopsis<br>thaliana)" AED:0.06 eAED:0.06<br>QI:115 1 1 1 1 1 4 351 141                        | 1.009<br>4991      | 1.8677196<br>4 | 0.0133<br>09481 | IPR0137<br>29<br>(PFAM)       | F:GO:0003677                                                    |
| <b>Xvis03_2027</b><br><b>8 4-PA</b> | processed-gene-9.6-mRNA-1<br>protein Name:"Similar to<br>At5g12110 Elongation factor<br>1-beta 1 (Arabidopsis<br>thaliana)" AED:0.07<br>eAED:0.07<br>QI:28 1 1 1 1 1 6 211 226                       | 2.926<br>0132<br>7 | 1.1571813<br>6 | 0.0138<br>74725 | IPR0147<br>17                 | F:GO:0003746;<br>P:GO:0006414                                   |
| <b>Xvis03_2148</b><br><b>7 1-PA</b> | augustus-gene-0.9-mRNA-1<br>protein Name:"Similar to CYS6<br>Cysteine proteinase inhibitor 6<br>(Arabidopsis thaliana)"<br>AED:0.25 eAED:0.25                                                        | 3.307<br>2269<br>5 | 1.0914322<br>6 | 0.0139<br>51824 | IPR0000<br>10<br>(PFAM);      | F:GO:0004869                                                    |

QI:34|0.2|0.33|1|0.8|0.83|6|0|2  
3 7

|                                     |                                                                                                                                                                                          |                    |                |                 |                                 |                                                |
|-------------------------------------|------------------------------------------------------------------------------------------------------------------------------------------------------------------------------------------|--------------------|----------------|-----------------|---------------------------------|------------------------------------------------|
| <b>Xvis03_2171</b><br><b>9 6-PA</b> | augustus-gene-1.26-mRNA-1<br>protein Name:"Similar to AKR2<br>Ankyrin repeat domain-<br>containing protein 2<br>(Arabidopsis thaliana)"<br>AED:0.11 eAED:0.11<br>QI:0 0 0 1 1 1 6 0 276  | 0.983<br>5682<br>7 | 1.7752949<br>7 | 0.0141<br>29423 | IPR0206<br>83<br>(PFAM);        | F:GO:0005515                                   |
| <b>Xvis03_2151</b><br><b>5 3-PA</b> | augustus-gene-12.40-mRNA-1<br>protein Name:"Similar to RZ1B<br>Glycine-rich RNA- binding<br>protein RZ1B (Arabidopsis<br>thaliana)" AED:0.25 eAED:0.25<br>QI:0 1 1 1 0.5 0.33 3 1599 326 | 0.738<br>4757<br>5 | 1.8385500<br>1 | 0.0176<br>2934  | IPR0005<br>04<br>(PFAM);        | F:GO:0003676;<br>F:GO:0008270                  |
| <b>Xvis03_2182</b><br><b>0 0-PA</b> | augustus-gene-6.42-mRNA-1<br>protein Name:"Similar to PLP1<br>Patatin-like protein 1 (Oryza<br>sativa subsp. japonica)"<br>AED:0.26 eAED:0.26<br>QI:72 0.4 0.16 1 1 1 6 0 314            | 2.889<br>8699<br>1 | 1.3064709<br>9 | 0.0177<br>4307  | IPR0026<br>41<br>(PFAM);        | P:GO:0006629                                   |
| <b>Xvis03_2255</b><br><b>3 2-PA</b> | processed-gene-0.13-mRNA-1<br>protein Name:"Similar to DHN3<br>Dehydrin DHN3 (Hordeum<br>vulgare)" AED:0.00 eAED:0.00<br>QI:270 1 1 1 1 1 2 257 183                                      | 1.112<br>5766<br>4 | 1.5992062<br>4 | 0.0182<br>50186 | IPR0001<br>67 (PFA              | P:GO:0009415                                   |
| <b>Xvis03_2029</b><br><b>2 9-PA</b> | augustus-gene-26.5-mRNA-1<br>protein Name:"Similar to<br>RPL23A 60S ribosomal<br>protein L23 (Arabidopsis<br>thaliana)" AED:0.39<br>eAED:0.40<br>QI:0 0 0 0.5 1 1 1 6 0 279              | 2.398<br>3112<br>9 | 1.2000962<br>9 | 0.0182<br>86027 | IPR0002<br>18<br>(PFAM)         | F:GO:0003735;<br>C:GO:0005840;<br>P:GO:0006412 |
| <b>Xvis03_2076</b><br><b>2 5-PA</b> | processed-gene-8.99-mRNA-1<br>protein Name:"Similar to<br>COR47 Dehydrin COR47<br>(Arabidopsis thaliana)"<br>AED:0.00 eAED:0.00<br>QI:100 1 1 1 1 1 2 435 268                            | 1.896<br>6244<br>9 | 1.7208972<br>8 | 0.0186<br>44009 | IPR0001<br>67<br>(PFAM)         | P:GO:0009415                                   |
| <b>Xvis03_2217</b><br><b>5 4-PA</b> | augustus-gene-1.62-mRNA-1<br>protein Name:"Similar to<br>MORF1 Multiple organellar<br>RNA editing factor 1,<br>mitochondrial (Arabidopsis                                                | 0.936<br>6691<br>8 | 1.7289507<br>2 | 0.0187<br>5143  | IPR0392<br>06<br>(PANTH<br>ER); | P:GO:0016554                                   |



thaliana)" AED:0.23  
 eAED:0.23  
 QI:47|1|1|0.75|0.6|5|384|406

|                    |                                 |       |           |        |         |               |
|--------------------|---------------------------------|-------|-----------|--------|---------|---------------|
| <b>Xvis03_2052</b> | processed-gene-22.101-          | 1.467 | 1.5839294 | 0.0189 | IPR0001 | P:GO:0009415  |
| <b>3 2-PA</b>      | mRNA-1 protein                  | 1627  | 8         | 02918  | 67      |               |
|                    | Name:"Similar to DHN1           | 6     |           |        | (PFAM)  |               |
|                    | Dehydrin DHN1 (Hordeum          |       |           |        |         |               |
|                    | vulgare)" AED:0.36              |       |           |        |         |               |
|                    | eAED:0.36                       |       |           |        |         |               |
|                    | QI:115 1 1 1 1 2 350 132        |       |           |        |         |               |
| <b>Xvis03_2181</b> | augustus-gene-3.24-mRNA-1       | 2.822 | 1.1671811 | 0.0194 | IPR0140 | F:GO:0009055; |
| <b>5 8-PA</b>      | protein Name:"Similar to        | 1512  | 2         | 40464  | 25      | F:GO:0015035; |
|                    | Glutaredoxin (Ricinus           | 7     |           |        |         | P:GO:0045454  |
|                    | communis)" AED:0.01             |       |           |        |         |               |
|                    | eAED:0.01                       |       |           |        |         |               |
|                    | QI:220 1 1 1 1 4 501 106        |       |           |        |         |               |
| <b>Xvis03_2002</b> | processed-gene-30.2-mRNA-1      | 19.81 | 0.5548722 | 0.0209 | IPR0131 | F:GO:0005524; |
| <b>5 0-PA</b>      | protein Name:"Similar to        | 3914  | 7         | 00757  | 26      | P:GO:0006457; |
|                    | HSP70 Stromal 70 kDa heat       |       |           |        | (PRINTS | F:GO:0051082  |
|                    | shock-related protein,          |       |           |        | )       |               |
|                    | chloroplastic (Pisum sativum)"  |       |           |        |         |               |
|                    | AED:0.12 eAED:0.12              |       |           |        |         |               |
|                    | QI:46 0.75 0.88 0.88 1 1 9 437  |       |           |        |         |               |
|                    | 741                             |       |           |        |         |               |
| <b>Xvis03_2056</b> | processed-gene-31.124-          | 13.01 | 0.6372995 | 0.0209 | IPR0018 | F:GO:0005524; |
| <b>9 1-PA</b>      | mRNA-1 protein                  | 9614  | 8         | 57446  | 44      | P:GO:0042026  |
|                    | Name:"Similar to RuBisCO        |       |           |        |         |               |
|                    | large subunit-binding protein   |       |           |        |         |               |
|                    | subunit beta, chloroplastic     |       |           |        |         |               |
|                    | (Pisum sativum)" AED:0.20       |       |           |        |         |               |
|                    | eAED:0.20                       |       |           |        |         |               |
|                    | QI:97 0.8 0.81 0.87 0.93 0.87 1 |       |           |        |         |               |
|                    | 6 0 678                         |       |           |        |         |               |
| <b>Xvis03_2064</b> | processed-gene-30.78-mRNA- 1    | 4.553 | 0.8864205 | 0.0234 | IPR0021 | P:GO:0000413; |
| <b>5 8-PA</b>      | protein Name:"Similar to        | 7958  | 6         | 936    | 30      | F:GO:0003755  |
|                    | PCKR1 Peptidyl-prolyl cis-      | 2     |           |        |         |               |
|                    | trans isomerase (Catharanthus   |       |           |        |         |               |
|                    | roseus)" AED:0.01 eAED:0.01     |       |           |        |         |               |
|                    | QI:0 -1 0 1 -1 1 1 0 173        |       |           |        |         |               |

|                                     |                                                                                                                                                                                                      |                    |                |                 |                                |                                                                 |
|-------------------------------------|------------------------------------------------------------------------------------------------------------------------------------------------------------------------------------------------------|--------------------|----------------|-----------------|--------------------------------|-----------------------------------------------------------------|
| <b>Xvis03_2098</b><br><b>7 6-PA</b> | augustus-gene-14.5-mRNA-1<br>protein Name:"Similar to<br>RPS27B 40S ribosomal protein<br>S27-2 (Arabidopsis thaliana)"<br>AED:0.17 eAED:0.17<br>QI:86 1 1 1 0.66 0.75 4 47 86                        | 0.779<br>0348<br>2 | 1.7654785<br>2 | 0.0216<br>19681 | IPR0005<br>92<br>(PFAM         | F:GO:0003735;<br>C:GO:0005840;<br>P:GO:0006412                  |
| <b>Xvis03_2021</b><br><b>0 3-PA</b> | processed-gene-9.9-mRNA-1<br>protein Name:"Similar to<br>Os02g0639900 Thioredoxin<br>M1, chloroplastic (Oryza<br>sativa subsp. japonica)"<br>AED:0.00 eAED:0.00<br>QI:100 1 1 1 1 1 2 1208 190       | 1.754<br>2165<br>8 | 1.3518750<br>5 | 0.0216<br>60558 | PR00421                        | P:GO:0006662;<br>F:GO:0015035;<br>P:GO:0045454                  |
| <b>Xvis03_2212</b><br><b>5 2-PA</b> | augustus-gene-6.27-mRNA-1<br>protein Name:"Similar to<br>SPG20 Sparti (Homo<br>sapiens)" AED:0.04<br>eAED:0.04<br>QI:93 1 1 1 0.75 0.6 5 21 403                                                      | 4.900<br>4118<br>4 | 0.9144375<br>7 | 0.0235<br>04246 | IPR0096<br>86<br>(PFAM)        | no GO terms                                                     |
| <b>Xvis03_2125</b><br><b>2 0-PA</b> | augustus-gene-6.14-mRNA-1<br>protein Name:"Similar to<br>TUF1B Elongation factor Tu,<br>chloroplastic (Glycine max)"<br>AED:0.04 eAED:0.16<br>QI:0 0 0.5 1 1 1 2 351 455                             | 6.587<br>0721<br>9 | 0.7929123      | 0.0280<br>19252 | IPR0007<br>95                  | F:GO:0003746;<br>F:GO:0003924;<br>F:GO:0005525;<br>P:GO:0006414 |
| <b>Xvis03_2114</b><br><b>2 4-PA</b> | augustus-gene-2.30-mRNA-1<br>protein Name:"Similar to<br>GLX2-2<br>Hydroxyacylglutathione<br>hydrolase cytoplasmic<br>(Arabidopsis thaliana)"<br>AED:0.23 eAED:0.23<br>QI:367 1 1 1 1 0.83 6 257 190 | 0.783<br>7434<br>4 | 1.6639410<br>2 | 0.0286<br>71952 | IPR0322<br>82<br>(PFAM)        | F:GO:0004416;<br>P:GO:0019243                                   |
| <b>Xvis03_2218</b><br><b>8 3-PA</b> | processed-gene-4.16-mRNA-1<br>protein Name:"Similar to<br>HVA22A HVA22-like protein a<br>(Arabidopsis thaliana)"<br>AED:0.26 eAED:0.26<br>QI:148 0.57 0.5 0.87 0.85 0.75 <br>8 368 228               | 0.456<br>4551<br>3 | 1.7182068<br>5 | 0.0293<br>54802 | IPR0043<br>45<br>(PANTH<br>ER) | no GO terms                                                     |
| <b>Xvis03_2175</b><br><b>8 5-PA</b> | augustus-gene-6.44-mRNA-1<br>protein Name:"Similar to PAB8<br>Polyadenylate-binding protein 8<br>(Arabidopsis thaliana)"                                                                             | 1.743<br>5770<br>4 | 1.2466561<br>2 | 0.0295<br>18147 | IPR012<br>6 77                 | F:GO:0003676;<br>F:GO:0003723                                   |

AED:0.09 eAED:0.09

QI:312|0.75|0.66|1|1|9|460|63

4

|                    |                                                                                                                                                                                    |               |                |                 |                        |                                                                 |
|--------------------|------------------------------------------------------------------------------------------------------------------------------------------------------------------------------------|---------------|----------------|-----------------|------------------------|-----------------------------------------------------------------|
| <b>Xvis03_2095</b> | processed-gene-8.27-mRNA-1                                                                                                                                                         | 0.883<br>5437 | 1.6641330<br>9 | 0.0306<br>7983  | IPR027                 | F:GO:0016491;                                                   |
| <b>4 8-PA</b>      | protein Name:"Similar to AN3<br>Naringenin,2-oxoglutarate 3-<br>dioxygenase (Fragment) (Petunia<br>hybrida)" AED:0.02 eAED:0.02<br>QI:65 1 1 1 1 3 192 370                         | 7             |                |                 | 4 43                   | P:GO:0055114                                                    |
| <b>Xvis03_2161</b> | augustus-gene-2.5-mRNA-1                                                                                                                                                           | 3.393<br>3298 | 0.9368866<br>8 | 0.0331<br>05684 | IPR004                 | F:GO:0003824;                                                   |
| <b>3 5-PA</b>      | protein Name:"Similar to GSA<br>Glutamate-1-semialdehyde<br>2,1-aminomutase,<br>chloroplastic (Oryza sativa<br>subsp. japonica)" AED:0.00<br>eAED:0.00<br>QI:90 1 1 1 1 3 296 478  | 2             |                |                 | 6 39                   | F:GO:0008483;<br>F:GO:0030170;<br>P:GO:0033014;<br>F:GO:0042286 |
| <b>Xvis03_2025</b> | augustus-gene-46.31-mRNA-1                                                                                                                                                         | 2.336<br>4062 | 1.2451940<br>2 | 0.0343<br>20067 | IPR000                 | P:GO:0006952                                                    |
| <b>6 2-PA</b>      | protein Name:"Similar to Major<br>pollen allergen Cor a 1 isoforms<br>5, 6, 11 and 16 (Corylus<br>avellana)" AED:0.26 eAED:0.26<br>QI:0 1 0.5 1 1 1 2 234 182                      | 8             |                |                 | 9 16<br>(PFAM<br>)     |                                                                 |
| <b>Xvis03_2157</b> | augustus-gene-6.67-mRNA-1                                                                                                                                                          | 0.884<br>6234 | 1.6552063<br>4 | 0.0352<br>91239 | IPR038                 | F:GO:0070300                                                    |
| <b>5 9-PA</b>      | protein Name:"Similar to<br>At5g39570 Uncharacterized<br>protein At5g39570<br>(Arabidopsis thaliana)"<br>AED:0.00 eAED:0.00<br>QI:88 1 1 1 1 1 2 401 452                           | 4             |                |                 | 9 43<br>(PANT<br>H ER) |                                                                 |
| <b>Xvis03_2238</b> | processed-gene-2.57-mRNA-1                                                                                                                                                         | 1.202<br>2400 | 1.3756846<br>3 | 0.0373<br>58344 | IPR024                 | F:GO:0003676;                                                   |
| <b>6 0-PA</b>      | protein Name:"Similar to<br>v1g171563 Eukaryotic<br>translation initiation factor 3<br>subunit G (Nematostella<br>vectensis)" AED:0.02<br>eAED:0.02<br>QI:0 1 0.5 1 1 1 2 3401 289 | 2             |                |                 | 6 75<br>(PFAM<br>)     | F:GO:0003743;<br>C:GO:0005737;<br>C:GO:0005852                  |

|                                     |                                                                                                                                                                                                             |                    |                |                 |                              |                                                                 |
|-------------------------------------|-------------------------------------------------------------------------------------------------------------------------------------------------------------------------------------------------------------|--------------------|----------------|-----------------|------------------------------|-----------------------------------------------------------------|
| <b>Xvis03_2247</b><br><b>5 4-PA</b> | processed-gene-1.55-mRNA-1<br>protein Name:"Similar to<br>At3g10130 Heme-binding-like<br>protein At3g10130, chloroplastic<br>(Arabidopsis thaliana)"<br>AED:0.02 eAED:0.02 QI:0 -<br>1 0 1 -<br>1 1 1 0 209 | 0.556<br>5459<br>9 | 1.6212252<br>7 | 0.0397<br>11403 | IPR006<br>9 17<br>(PFAM<br>) | no GO terms                                                     |
| <b>Xvis03_2207</b><br><b>1 9-PA</b> | augustus-gene-6.9-mRNA-1<br>protein Name:"Similar to<br>TSJT1 Stem-specific protein<br>TSJT1 (Nicotiana tabacum)"<br>AED:0.07 eAED:0.07<br>QI:59 0.5 0.8 0.8 1 1 5 232 256                                  | 0.527<br>9493<br>4 | 1.6116065<br>9 | 0.0412<br>78577 | IPR029<br>0 55               | no GO terms                                                     |
| <b>Xvis03_2081</b><br><b>4 0-PA</b> | processed-gene-11.6-mRNA-1<br>protein Name:"Similar to atad1a<br>ATPase family AAA domain-<br>containing protein 1-A (Danio<br>rerio)" AED:0.12 eAED:0.12<br>QI:153 0.88 0.94 0.94 0.83 0.7<br>8 19 436 852 | 0.458<br>6671<br>1 | 1.5705785<br>9 | 0.0417<br>79846 | IPR003<br>9 59<br>(PFAM<br>) | F:GO:0005524                                                    |
| <b>Xvis03_21576</b><br><b>4-PA</b>  | augustus-gene-6.61-mRNA-1<br>protein Name:"Similar to 29<br>kDa ribonucleoprotein B,<br>chloroplastic (Nicotiana<br>sylvestris)" AED:0.25<br>eAED:0.25<br>QI:94 0.75 0.6 0.8 1 1 5 0 355                    | 3.073<br>1014<br>8 | 0.9518617<br>3 | 0.0427<br>28409 | IPR0126<br>77                | F:GO:0003676                                                    |
| <b>Xvis03_20141</b><br><b>6-PA</b>  | processed-gene-12.20-mRNA-1<br>protein Name:"Similar to<br>Phosphoglycerate kinase,<br>chloroplastic (Nicotiana<br>tabacum)" AED:0.04<br>eAED:0.04<br>QI:190 1 1 1 1 6 289 477                              | 21.54<br>8955<br>5 | 0.4267875      | 0.0432<br>73487 | IPR0015<br>76                | F:GO:0004618;<br>P:GO:0006096                                   |
| <b>Xvis03_22054</b><br><b>9-PA</b>  | processed-gene-6.81-mRNA-1<br>protein Name:"Similar to<br>NFS2 Cysteine desulfurase 1,<br>chloroplastic (Arabidopsis<br>thaliana)" AED:0.13<br>eAED:0.23<br>QI:55 0.77 0.8 1 1 1 10 0 498                   | 0.521<br>1484<br>4 | 1.5881456<br>9 | 0.0439<br>76028 | IPR0154<br>21                | F:GO:0003824;<br>P:GO:0006534;<br>F:GO:0030170;<br>F:GO:0031071 |
| <b>Xvis03_20314</b><br><b>0-PA</b>  | processed-gene-45.24-mRNA-1<br>protein Name:"Similar to<br>HSP81-1 Heat shock protein<br>81-1 (Oryza sativa subsp.<br>japonica)" AED:0.48<br>eAED:0.48 QI:0 -1 0 1 -<br>1 1 1 0 114                         | 0.541<br>9099<br>6 | 1.5849319      | 0.0443<br>55192 | IPR0014<br>04<br>(PFAM)      | F:GO:0005524;<br>P:GO:0006457;<br>F:GO:0051082                  |

|                                     |                                                                                                                                                                                                   |                     |                |                 |                         |                                                                 |
|-------------------------------------|---------------------------------------------------------------------------------------------------------------------------------------------------------------------------------------------------|---------------------|----------------|-----------------|-------------------------|-----------------------------------------------------------------|
| <b>Xvis03_20645</b><br><b>3-PA</b>  | processed-gene-29.128-mRNA-1 protein<br>Name:"Similar to CSP4 Cold shock domain-containing protein 4 (Arabidopsis thaliana)" AED:0.32<br>eAED:0.32 QI:0 -1 0 1 -1 1 1 0 231                       | 1.364<br>6643       | 1.2821974<br>5 | 0.0446<br>71688 | PR01228                 | F:GO:0003676;<br>F:GO:0008270                                   |
| <b>Xvis03_21997</b><br><b>7-PA</b>  | augustus-gene-5.85-mRNA-1<br>protein Name:"Similar to Os02g0194200 Zinc finger CCH domain-containing protein 14 (Oryza sativa subsp. japonica)" AED:0.00<br>eAED:0.00<br>QI:185 1 1 1 1 3 411 290 | 0.560<br>2625<br>4  | 1.5510297<br>7 | 0.0453<br>28627 | IPR0366<br>12           | F:GO:0003723;<br>F:GO:0046872                                   |
| <b>Xvis03_22277</b><br><b>8-PA</b>  | processed-gene-2.13-mRNA-1<br>protein Name:"Similar to PR1 Pathogenesis-related protein 1 (Asparagus officinalis)" AED:0.28 eAED:0.28<br>QI:65 1 1 1 1 1 2 141 157                                | 1.870<br>5001<br>6  | 1.1787611<br>6 | 0.0462<br>45264 | IPR0009<br>16<br>(PFAM) | P:GO:0006952                                                    |
| <b>Xvis03_20559</b><br><b>4-PA</b>  | augustus-gene-17.68-mRNA-1<br>protein Name:"Similar to RPS27B 40S ribosomal protein S27-2 (Arabidopsis thaliana)" AED:0.09<br>eAED:0.09<br>QI:0 1 0.75 1 1 1 4 342 163                            | 0.984<br>6833<br>2  | 1.4036832<br>5 | 0.0480<br>67861 | IPR0005<br>92<br>(PFAM) | F:GO:0003735;<br>C:GO:0005840;<br>P:GO:0006412                  |
| <b>Xvis03_20736</b><br><b>8-PA</b>  | processed-gene-12.44-mRNA-1<br>protein Name:"Similar to Polyphenol oxidase, chloroplastic (Malus domestica)" AED:0.07<br>eAED:0.08 QI:0 -1 0 1 -1 1 1 0 578                                       | 8.365<br>8069<br>8  | 0.7293521<br>9 | 0.0498<br>40164 | IPR0022<br>27<br>(PFAM) | F:GO:0004097;<br>F:GO:0016491;<br>P:GO:0046148;<br>P:GO:0055114 |
| <b>Xvis03_211532</b><br><b>- PA</b> | est_gff_Cufflinks-gene-11.15-mRNA-1 protein<br>Name:"Similar to Glucan endo-1,3-beta-glucosidase, acidic isoform (Zea mays)" AED:0.00<br>eAED:0.00<br>QI:59 1 1 1 1 1 2 102 335                   | 3.1<br>59<br>9<br>9 | -2.188         | 0.0038<br>9     | IPR000490<br>(PFAM)     |                                                                 |
| <b>Xvis03_2128</b><br><b>94- PA</b> | augustus-gene-2.1-mRNA-1<br>protein Name:"Similar to PORB Protochlorophyllide reductase B, chloroplastic (Hordeum vulgare)" AED:0.09 eAED:0.09<br>QI:162 1 1 1 1 1 5 457 393                      | 3.051<br>49         | - 1.808<br>8   | 0.0068<br>7     | IPR002<br>347<br>(PFAM) |                                                                 |
| <b>Xvis03_21336</b><br><b>3- PA</b> | processed-gene-12.66-mRNA-1 protein<br>Name:"Similar to Os09g0529100 Probable 6-phosphogluconolactonase 4, chloroplastic (Oryza sativa subsp. japonica)" AED:0.04                                 | 0.919<br>26         | - 1.905<br>2   | 0.0097<br>4     | IPR006<br>148<br>(PFAM) | F:GO:0004553;<br>P:GO:0005975                                   |

eAED:0.04  
 QI:89|1|1|1|1|3|259|276

|                                     |                                                                                                                                                                                                              |             |              |             |                              |                                                                                  |
|-------------------------------------|--------------------------------------------------------------------------------------------------------------------------------------------------------------------------------------------------------------|-------------|--------------|-------------|------------------------------|----------------------------------------------------------------------------------|
| <b>Xvis03_22489</b><br><b>7- PA</b> | augustus-gene-1.57-mRNA-1<br>protein Name:"Similar to HSP90<br>Endoplasmin homolog<br>(Catharanthus<br>roseus)" AED:0.10<br>eAED:0.10<br>QI:52 0.92 0.93 1 1 15 395 <br>788                                  | 4.507<br>08 | - 1.166<br>9 | 0.0098<br>7 | IPR003<br>594<br>(PFAM)<br>; | F:GO:0016630;<br>P:GO:0055114                                                    |
| <b>Xvis03_22445</b><br><b>9- PA</b> | augustus-gene-1.13-mRNA-1<br>protein Name:"Similar to<br>RABA2A Ras- related protein<br>RABA2a (Arabidopsis thaliana)"<br>AED:0.02 eAED:0.02<br>QI:202 1 1 1 1 2 509 220                                     | 1.266<br>09 | - 1.627<br>4 | 0.0140<br>4 | IPR001<br>806<br>(PFAM)      | P:GO:0005975;<br>P:GO:0006098;<br>F:GO:0017057                                   |
| <b>Xvis03_20731</b><br><b>1- PA</b> | processed-gene-7.62-mRNA-<br>1 protein Name:"Similar to<br>ADK-B Adenylate kinase 4<br>(Oryza sativa subsp.<br>japonica)" AED:0.05<br>eAED:0.05<br>QI:122 1 1 1 1 6 379 246                                  | 2.075<br>78 | - 1.441<br>8 | 0.0150<br>2 | IPR007<br>862<br>(PFAM)      | F:GO:0005524;<br>P:GO:0006457;<br>F:GO:0051082                                   |
| <b>Xvis03_20766</b><br><b>5- PA</b> | processed-gene-12.71-mRNA-1<br>protein Name:"Similar to HSP90<br>Endoplasmin homolog<br>(Catharanthus roseus)" AED:0.12<br>eAED:0.12<br>QI:42 1 1 1 1 15 358 812                                             | 3.284<br>64 | - 1.220<br>9 | 0.0154<br>8 | IPR003<br>594<br>(PFAM)      | F:GO:0003924;<br>F:GO:0005525                                                    |
| <b>Xvis03_20999</b><br><b>2- PA</b> | processed-gene-2.103-mRNA-<br>1 protein Name:"Similar to<br>Os06g0675700 Probable alpha-<br>glucosidase Os06g0675700<br>(Oryza sativa subsp. japonica)"<br>AED:0.08<br>eAED:0.08<br>QI:226 1 1 1 1 5 499 873 | 2.492<br>02 | - 1.261<br>4 | 0.0165<br>6 | IPR025<br>887<br>(PFAM)      | F:GO:0004017;<br>F:GO:0005524;<br>P:GO:0006139;<br>F:GO:0016776;<br>F:GO:0019205 |
| <b>Xvis03_21035</b><br><b>0- PA</b> | processed-gene-9.1-mRNA-1<br>protein Name:"Similar to TP53I3<br>Quinone oxidoreductase PIG3<br>(Homo sapiens)" AED:0.11<br>eAED:0.11<br>QI:0 0.44 0.5 0.7 1 10 268 486                                       | 1.934<br>08 | - 1.550<br>4 | 0.0172<br>1 | IPR013<br>149<br>(PFAM)      | F:GO:0005524;<br>P:GO:0006457;<br>F:GO:0051082                                   |

|                                     |                                                                                                                                                                                                       |             |              |             |                              |                                                                                  |
|-------------------------------------|-------------------------------------------------------------------------------------------------------------------------------------------------------------------------------------------------------|-------------|--------------|-------------|------------------------------|----------------------------------------------------------------------------------|
| <b>Xvis03_21638</b><br><b>7- PA</b> | augustus-gene-11.65-mRNA-1 protein<br>Name:"Similar to Alpha-galactosidase (Coffea arabica)"<br>AED:0.16 eAED:0.16<br>QI:81 1 1 1 0.92 0.92 14 139 642                                                | 3.489<br>55 | - 1.071<br>4 | 0.0184<br>5 | IPR041<br>233<br>(PFAM)      | F:GO:0003824;<br>F:GO:0004553;<br>P:GO:0005975;<br>F:GO:0030246                  |
| <b>Xvis03_21648</b><br><b>0- PA</b> | augustus-gene-6.109-mRNA-1 protein Name:"Similar to UVR8 Ultraviolet-B receptor UVR8 (Arabidopsis thaliana)"<br>AED:0.10 eAED:0.10<br>QI:223 0.9 1 1 1 1 1 1 290 403                                  | 1.254<br>57 | - 1.567<br>1 | 0.0203<br>3 | IPR000408                    | P:GO:0055114                                                                     |
| <b>Xvis03_20731</b><br><b>1- PA</b> | processed-gene-7.62-mRNA-1 protein Name:"Similar to ADK-B Adenylate kinase 4 (Oryza sativa subsp. japonica)" AED:0.05 eAED:0.05<br>QI:122 1 1 1 1 1 6 379 246                                         | 2.074<br>74 | - 1.359<br>7 | 0.0235<br>9 | IPR007<br>862<br>(PFAM)      | F:GO:0003824;<br>F:GO:0004553;<br>P:GO:0005975                                   |
| <b>Xvis03_20360</b><br><b>8- PA</b> | processed-gene-32.69-mRNA-1 protein Name:"Similar to PNSL1 Photosynthetic NDH subunit of lumenal location 1, chloroplastic (Arabidopsis thaliana)" AED:0.12 eAED:0.08<br>QI:81 1 0.85 1 1 1 7 565 263 | 0.923<br>83 | - 1.628<br>8 | 0.0251<br>9 | IPR00<br>2683<br>(PFA<br>M); | F:GO:0009881;<br>P:GO:0010224;<br>F:GO:0042803                                   |
| <b>Xvis03_20613</b><br><b>8- PA</b> | processed-gene-3.62-mRNA-1 protein Name:"Similar to CHI4 Endochitinase PR4 (Phaseolus vulgaris)" AED:0.03 eAED:0.03<br>QI:30 1 1 1 1 1 2 158 277                                                      | 1.246<br>83 | - 1.702<br>3 | 0.0271<br>2 | IPR00<br>1002<br>(PFA<br>M)  | F:GO:0004017;<br>F:GO:0005524;<br>P:GO:0006139;<br>F:GO:0016776;<br>F:GO:0019205 |
| <b>Xvis03_21918</b><br><b>5- PA</b> | processed-gene-8.51-mRNA-1 protein Name:"Similar to tal Transaldolase (Acidothermus cellulolyticus (strain ATCC 43068 / 11B))" AED:0.03 eAED:0.03<br>QI:60 0.83 0.85 1 1 1 7 483 446                  | 0.544<br>74 | - 1.735<br>5 | 0.0277<br>7 | IPR00<br>1585<br>(PFA<br>M)  | F:GO:0005509;<br>C:GO:0009523;<br>C:GO:0009654;<br>P:GO:0015979;<br>C:GO:0019898 |
| <b>Xvis03_20267</b><br><b>2- PA</b> | processed-gene-54.103-mRNA-1 protein<br>Name:"Similar to HEMC Porphobilinogen deaminase, chloroplastic (Oryza sativa                                                                                  | 3.147<br>76 | -1.086       | 0.0314      | IPR02<br>2418<br>(PFA<br>M)  | F:GO:0004568;<br>P:GO:0005975;<br>P:GO:0006032;<br>F:GO:0008061;<br>P:GO:0016998 |

subsp. japonica)" AED:0.01

eAED:0.01

QI:117|1|1|1|1|5|327|378

|                     |                                                                                                                                                                                                                                                         |             |              |             |                      |                                                                 |
|---------------------|---------------------------------------------------------------------------------------------------------------------------------------------------------------------------------------------------------------------------------------------------------|-------------|--------------|-------------|----------------------|-----------------------------------------------------------------|
| <b>Xvis03_20371</b> | processed-gene-43.103-mRNA-1                                                                                                                                                                                                                            | 4.416<br>19 | - 0.894<br>4 | 0.0325<br>4 | IPR02                | F:GO:0003824;                                                   |
| <b>4- PA</b>        | protein Name:"Similar to<br>At4g26910 Dihydrolipoyllysine-<br>residue succinyltransferase<br>component of 2- oxoglutarate<br>dehydrogenase complex 2,<br>mitochondrial (Arabidopsis<br>thaliana)" AED:0.18 eAED:0.18<br>QI:18 1 1 1 0.85 0.8 15 384 475 |             |              |             | 0828<br>(PFA<br>M)   | F:GO:0004801;<br>C:GO:0005737;<br>P:GO:0005975;<br>P:GO:0006098 |
| <b>Xvis03_20785</b> | augustus-gene-3.47-mRNA-1                                                                                                                                                                                                                               | 7.893<br>22 | -0.733       | 0.0328<br>8 | IPR02                | F:GO:0004418;                                                   |
| <b>6- PA</b>        | protein Name:"Similar to GAPC2<br>Glyceraldehyde-3-phosphate<br>dehydrogenase 2, cytosolic<br>(Oryza sativa subsp. japonica)"<br>AED:0.71<br>eAED:0.72<br>QI:0 0 0 0.66 1 1 6 0 224                                                                     |             |              |             | 0828<br>(PFA<br>M)   | P:GO:0033014                                                    |
| <b>Xvis03_20041</b> | processed-gene-51.69-mRNA-1                                                                                                                                                                                                                             | 1.284<br>94 | - 1.548<br>5 | 0.0377<br>6 | );<br>IPR0109        | F:GO:0004149;<br>P:GO:0006099;                                  |
| <b>6- PA</b>        | 1 protein Name:"Similar to<br>CHLM Magnesium<br>protoporphyrin IX<br>methyltransferase,<br>chloroplastic (Arabidopsis<br>thaliana)" AED:0.34<br>eAED:0.34 QI:0 -1 0 1 -1 1 1 0 322                                                                      |             |              |             | 40<br>(PFAM          | F:GO:0016620;<br>F:GO:0016746;<br>C:GO:0045252;<br>P:GO:0055114 |
| <b>Xvis03_22011</b> | augustus-gene-8.33-mRNA-1                                                                                                                                                                                                                               | 3.421<br>34 | - 0.937<br>8 | 0.0414<br>9 | IPR03                | F:GO:0016620;                                                   |
| <b>2- PA</b>        | protein Name:"Similar to RPL5<br>50S ribosomal protein L5,<br>chloroplastic (Arabidopsis<br>thaliana)" AED:0.02 eAED:0.03<br>QI:29 0.5 0.33 1 1 1 3 0 284                                                                                               |             |              |             | 1309<br>(PFA<br>M)   | P:GO:0055114                                                    |
| <b>Xvis03_21577</b> | augustus-gene-7.23-mRNA-1                                                                                                                                                                                                                               | 0.901<br>09 | - 1.542<br>3 | 0.0443<br>7 | PTHR42               | P:GO:0015995;                                                   |
| <b>4- PA</b>        | protein Name:"Similar to CHLP<br>Geranylgeranyl diphosphate<br>reductase, chloroplastic<br>(Nicotiana tabacum)" AED:0.00<br>eAED:0.00<br>QI:382 1 1 1 1 2 212 364                                                                                       |             |              |             | 685<br>(PANTH<br>ER) | F:GO:0046406                                                    |



|                     |                                                                                                                                                                                              |             |              |              |                    |                                                                 |
|---------------------|----------------------------------------------------------------------------------------------------------------------------------------------------------------------------------------------|-------------|--------------|--------------|--------------------|-----------------------------------------------------------------|
| <b>Xvis03_21360</b> | processed-gene-14.84-mRNA-1                                                                                                                                                                  | 0.701<br>86 | - 1.537<br>1 | 0.0450<br>6  | IPR01              | F:GO:0003735;                                                   |
| <b>5- PA</b>        | protein Name:"Similar to<br>Os08g0288200 Probable<br>adenylate kinase 5, chloroplastic<br>(Oryza sativa subsp. japonica)"<br>AED:0.22 eAED:0.22<br>QI:25 1 0.94 1 1 1 17 0 611               |             |              |              | 8962<br>(PFA<br>M) | C:GO:0005840;<br>P:GO:0006412                                   |
| <b>Xvis03_21892</b> | processed-gene-4.16-                                                                                                                                                                         | 2.115<br>55 | - 1.344<br>3 | 0.0478<br>4  | IPR00              | P:GO:0015979;                                                   |
| <b>7- PA</b>        | mRNA-1 protein<br>Name:"Similar to PORB<br>Protochlorophyllide reductase<br>B, chloroplastic (Hordeum<br>vulgare)" AED:0.12<br>eAED:0.12<br>QI:128 0.75 0.6 1 1 1 5 341 353                  |             |              |              | 2347<br>(PFA<br>M) | P:GO:0015995;<br>F:GO:0045550;<br>P:GO:0051188;<br>P:GO:0055114 |
| <b>Xvis03_21205</b> | augustus-gene-18.3-mRNA-1                                                                                                                                                                    | 0.879<br>62 | - 1.475<br>1 | 0.0482<br>2  | IPR024             | F:GO:0004017;                                                   |
| <b>2- PA</b>        | protein Name:"Similar to RPN8A<br>26S proteasome non-ATPase<br>regulatory subunit 7 homolog A<br>(Arabidopsis thaliana)" AED:0.29<br>eAED:0.29<br>QI:0 0.9 0.81 0.90 1 1 11 444 363          |             |              |              | 969<br>(PFAM)      | F:GO:0005524;<br>P:GO:0006139;<br>F:GO:0016776;<br>F:GO:0019205 |
| <b>Xvis03_21126</b> | processed-gene-9.25-mRNA-1                                                                                                                                                                   | 0.810<br>8  | - 1.481<br>1 | 0.0488<br>9  | IPR001096          | F:GO:0016630;                                                   |
| <b>8- PA</b>        | protein Name:"Similar to<br>Vacuolar- processing enzyme<br>(Citrus sinensis)" AED:0.07<br>eAED:0.07<br>QI:3 1 1 1 1 1 9 417 590                                                              |             |              |              |                    | P:GO:0055114                                                    |
| <b>Xvis03_22309</b> | augustus-gene-3.96-mRNA-1                                                                                                                                                                    | 1.792<br>06 | - 1.193<br>4 | 0.0491<br>3  | IPR005805          | F:GO:0005515;                                                   |
| <b>5- PA</b>        | protein Name:"Similar to petC<br>Cytochrome b6-f complex iron-<br>sulfur subunit, chloroplastic<br>(Oryza sativa subsp. japonica)"<br>AED:0.11 eAED:0.11<br>QI:167 0.33 0.75 1 1 1 4 287 178 |             |              |              |                    | C:GO:0005838                                                    |
| <b>Xvis03_21211</b> | augustus-gene-6.61-mRNA-1                                                                                                                                                                    | 3.887<br>92 | - 2.439<br>4 | 4.44E-<br>05 | IPR004             | P:GO:0006508;                                                   |
| <b>3- PA</b>        | protein Name:"Similar to GGAT1<br>Glutamate--glyoxylate<br>aminotransferase 1 (Arabidopsis<br>thaliana)" AED:0.19 eAED:0.19<br>QI:107 0.85 0.93 0.93 0.85 0.93 15 <br>45 0 533               |             |              |              | 839<br>(PFAM)<br>; | F:GO:0008233                                                    |

|              |                                                                                                                                                                                                                                |             |              |              |                                                                                                                                                                            |                                                                 |
|--------------|--------------------------------------------------------------------------------------------------------------------------------------------------------------------------------------------------------------------------------|-------------|--------------|--------------|----------------------------------------------------------------------------------------------------------------------------------------------------------------------------|-----------------------------------------------------------------|
| Xvis03_21985 | augustus-gene-3.73-mRNA-1                                                                                                                                                                                                      | 18.78<br>78 | - 1.278<br>3 | 9.28E-<br>05 | IPR002                                                                                                                                                                     | F:GO:0008121;                                                   |
| 9- PA        | protein Name:"Similar to PSBO<br>Oxygen- evolving enhancer<br>protein 1, chloroplastic (Solanum<br>lycopersicum)" AED:0.03<br>eAED:0.03<br>QI:216 1 1 1 1 2 224 332                                                            |             |              |              | 628<br>(PFAM)<br>;<br>F:GO:0009496;<br>C:GO:0009507;<br>C:GO:0016020;<br>F:GO:0016491;<br>F:GO:0016679;<br>C:GO:0042651;<br>F:GO:0045158;<br>F:GO:0051537;<br>P:GO:0055114 |                                                                 |
| Xvis03_22385 | processed-gene-1.15-mRNA-1                                                                                                                                                                                                     | 18.45<br>85 | -1.198       | 0.0002<br>6  | IPR003                                                                                                                                                                     | F:GO:0003824;                                                   |
| 3- PA        | protein Name:"Similar to<br>RCA2 Ribulose bisphosphate<br>carboxylase/oxygenase<br>activase 2, chloroplastic<br>(Larrea tridentata)" AED:0.12<br>eAED:0.12<br>QI:111 1 1 1 0.83 0.71 7 332 438                                 |             |              |              | 959<br>(PFAM)<br>;<br>P:GO:0009058;<br>F:GO:0030170                                                                                                                        |                                                                 |
| Xvis03_20470 | processed-gene-11.1-mRNA-1                                                                                                                                                                                                     | 2.530<br>29 | - 2.250<br>6 | 0.0004       | IPR001                                                                                                                                                                     | C:GO:0009654;                                                   |
| 5- PA        | protein Name:"Similar to RPS17<br>40S ribosomal protein S17<br>(Solanum lycopersicum)"<br>AED:0.06 eAED:0.06<br>QI:0 -1 0 1 -1 1 1 0 143                                                                                       |             |              |              | 210<br>(PFAM)<br>;<br>P:GO:0010207;<br>F:GO:0010242;<br>P:GO:0042549                                                                                                       |                                                                 |
| Xvis03_21421 | processed-gene-11.33-mRNA-<br>1 protein Name:"Similar to<br>APX1 L- ascorbate peroxidase,<br>cytosolic<br>(Pisum sativum)" AED:0.17<br>eAED:0.17<br>QI:131 1 1 1 1 1 7 558 249                                                 | 2.831<br>13 | - 2.016<br>1 | 0.0005<br>2  | IPR002016                                                                                                                                                                  | F:GO:0005524                                                    |
| Xvis03_22307 | processed-gene-1.89-mRNA-1                                                                                                                                                                                                     | 2.977<br>24 | - 1.981<br>2 | 0.0005<br>6  | IPR022                                                                                                                                                                     | F:GO:0003735;                                                   |
| 7- PA        | protein Name:"Similar to CAB13<br>Chlorophyll a-b binding protein<br>13, chloroplastic (Solanum<br>lycopersicum)" AED:0.07<br>eAED:0.07<br>QI:182 1 1 1 1 1 4 188 263                                                          |             |              |              | 796<br>(PFAM)<br>;<br>C:GO:0005840;<br>P:GO:0006412                                                                                                                        |                                                                 |
| Xvis03_22385 | processed-gene-1.15-mRNA-<br>1 protein Name:"Similar to<br>RCA2 Ribulose bisphosphate<br>carboxylase/oxygenase activase 2,<br>chloroplastic (Larrea tridentata)"<br>AED:0.12 eAED:0.12<br>QI:111 1 1 1 0.83 0.71 7 332 4<br>38 | 8.529       | - 1.415<br>7 | 0.0006<br>1  |                                                                                                                                                                            | F:GO:0004601;<br>P:GO:0006979;<br>F:GO:0020037;<br>P:GO:0055114 |

|                   |                                                                                                                                                                                  |             |              |             |                    |                                                                 |
|-------------------|----------------------------------------------------------------------------------------------------------------------------------------------------------------------------------|-------------|--------------|-------------|--------------------|-----------------------------------------------------------------|
| <b>Xvis03_204</b> | processed-gene-11.1-mRNA-1                                                                                                                                                       | 2.456<br>9  | - 2.152<br>5 | 0.0006<br>9 | IPR001             | P:GO:0009765;                                                   |
| <b>705- PA</b>    | protein Name:"Similar to RPS17<br>40S ribosomal protein S17<br>(Solanum lycopersicum)"<br>AED:0.06 eAED:0.06<br>QI:0 -1 0 1 -1 1 1 0 143                                         |             |              |             | 210<br>(PFAM<br>); | C:GO:0016020                                                    |
| <b>Xvis03_220</b> | augustus-gene-8.33-mRNA-1                                                                                                                                                        | 3.421<br>34 | - 1.842<br>4 | 0.0009<br>1 | IPR031             | F:GO:0005524                                                    |
| <b>112- PA</b>    | protein Name:"Similar to RPL5<br>50S ribosomal protein L5,<br>chloroplastic (Arabidopsis<br>thaliana)" AED:0.02 eAED:0.03<br>QI:29 0.5 0.33 1 1 1 3 0 284                        |             |              |             | 309<br>(PFAM<br>)  |                                                                 |
| <b>Xvis03_208</b> | augustus-gene-6.16-mRNA-1                                                                                                                                                        | 20.07<br>66 | - 1.030<br>3 | 0.0009<br>5 |                    | F:GO:0003735;                                                   |
| <b>337- PA</b>    | protein Name:"Similar to PSBO<br>Oxygen- evolving enhancer<br>protein 1, chloroplastic (Solanum<br>lycopersicum)" AED:0.08<br>eAED:0.08<br>QI:229 1 1 1 0.5 0.33 3 86 332        |             |              |             |                    | C:GO:0005840;<br>P:GO:0006412                                   |
| <b>Xvis03_209</b> | processed-gene-2.101-mRNA-1                                                                                                                                                      | 8.305<br>61 | - 1.323<br>2 | 0.0009<br>9 | IPR002             | F:GO:0003735;                                                   |
| <b>988- PA</b>    | protein Name:"Similar to PSBP<br>Oxygen-evolving enhancer<br>protein 2, chloroplastic (Cucumis<br>sativus)" AED:0.32 eAED:0.32<br>QI:142 1 1 1 1 1 4 296 262                     |             |              |             | 683<br>(PFAM<br>); | C:GO:0005840;<br>P:GO:0006412                                   |
| <b>Xvis03_211</b> | processed-gene-14.7-mRNA-1                                                                                                                                                       | 3.490<br>88 | - 1.591<br>2 | 0.0016<br>6 | IPR023329          | C:GO:0009654;                                                   |
| <b>060- PA</b>    | protein Name:"Similar to<br>Chlorophyll a-b binding protein,<br>chloroplastic (Spinacia oleracea)"<br>AED:0.01<br>eAED:0.01 QI:0 -1 0 1 -1 1 1 0 268                             |             |              |             |                    | P:GO:0010207;<br>F:GO:0010242;<br>P:GO:0042549                  |
| <b>Xvis03_209</b> | processed-gene-2.103-mRNA-1                                                                                                                                                      | 2.492<br>02 | - 1.860<br>9 | 0.0016<br>8 | IPR025             | F:GO:0005509;                                                   |
| <b>992- PA</b>    | 1 protein Name:"Similar to<br>Os06g0675700 Probable alpha-<br>glucosidase Os06g0675700<br>(Oryza sativa subsp. japonica)"<br>AED:0.08<br>eAED:0.08<br>QI:226 1 1 1 1 1 5 499 873 |             |              |             | 887<br>(PFAM<br>)  | C:GO:0009523;<br>C:GO:0009654;<br>P:GO:0015979;<br>C:GO:0019898 |
| <b>Xvis03_222</b> | augustus-gene-5.53-mRNA-1                                                                                                                                                        | 1.934<br>13 | - 2.149<br>4 | 0.0022<br>7 | IPR002016          | P:GO:0009765;                                                   |
| <b>105- PA</b>    | protein Name:"Similar to APXT<br>L-ascorbate peroxidase T,                                                                                                                       |             |              |             |                    | C:GO:0016020                                                    |

chloroplastic (Arabidopsis  
thaliana)" AED:0.32 eAED:0.32  
QI:0|0.5|0.45|0.72|0.9|0.81|1|1|0|364

|                                     |                                                                                                                                                                                                                              |             |              |             |                                |                                                                                  |
|-------------------------------------|------------------------------------------------------------------------------------------------------------------------------------------------------------------------------------------------------------------------------|-------------|--------------|-------------|--------------------------------|----------------------------------------------------------------------------------|
| <b>Xvis03_219</b><br><b>178- PA</b> | processed-gene-7.19-mRNA-1<br>protein Name:"Similar to<br>CNX1 Calnexin homolog 1<br>(Arabidopsis thaliana)"<br>AED:0.09 eAED:0.09<br>QI:144 1 1 1 0.83 0.71 7 378 540                                                       | 5.205<br>08 | - 1.579<br>1 | 0.0023<br>6 | IPR001580                      | F:GO:0003824;<br>F:GO:0004553;<br>P:GO:0005975;<br>F:GO:0030246                  |
| <b>Xvis03_223</b><br><b>899- PA</b> | processed-gene-1.98-mRNA-1<br>protein Name:"Similar to RCA1<br>Ribulose biphosphate<br>carboxylase/oxygenase activase,<br>chloroplastic (Zea mays)"<br>AED:0.16 eAED:0.16<br>QI:463 0.90 0.91 1 0.81 0.66 12 2<br>25 2<br>80 | 20.31       | - 0.901<br>6 | 0.0030<br>5 | IPR003<br>959<br>(PFAM<br>);   | F:GO:0004601;<br>P:GO:0006979;<br>F:GO:0020037;<br>P:GO:0055114                  |
| <b>Xvis03_201</b><br><b>883- PA</b> | augustus-gene-50.73-mRNA-1<br>protein Name:"Similar to APX1<br>L- ascorbate peroxidase,<br>cytosolic (Pisum sativum)"<br>AED:0.15 eAED:0.15<br>QI:0 0.85 0.75 1 1 0.87 8 414 307                                             | 2.256<br>91 | - 1.834<br>6 | 0.0031<br>2 | IPR002<br>207<br>(PRINT<br>S); | F:GO:0005509;<br>F:GO:0005515;<br>C:GO:0005783;<br>P:GO:0006457;<br>F:GO:0051082 |
| <b>Xvis03_206</b><br><b>991- PA</b> | augustus-gene-10.52-mRNA-1<br>protein Name:"Similar to CPN21<br>20 kDa chaperonin, chloroplastic<br>(Arabidopsis thaliana)"<br>AED:0.07<br>eAED:0.07<br>QI:99 1 1 1 1 1 5 439 254                                            | 5.803<br>16 | - 1.302<br>9 | 0.0033<br>7 | IPR020818                      | F:GO:0005524                                                                     |

|                         |                                                                                                                                                                                                    |             |                 |             |                   |                                                                                  |
|-------------------------|----------------------------------------------------------------------------------------------------------------------------------------------------------------------------------------------------|-------------|-----------------|-------------|-------------------|----------------------------------------------------------------------------------|
| <b>Xvis03_207825-PA</b> | processed-gene-26.31-mRNA-1 protein Name:"Similar to RPS17 40S ribosomal protein S17 (Solanum lycopersicum)" AED:0.03 eAED:0.03 QI:0 -1 0 1 -1 1 1 0 146                                           | 3.876<br>17 | -<br>1.520<br>2 | 0.0035<br>5 | IPR036401         | F:GO:0004601;<br>P:GO:0006979;<br>F:GO:0020037;<br>P:GO:0055114                  |
| <b>Xvis03_213217-PA</b> | augustus-gene-16.1-mRNA-1 protein Name:"Similar to CSP41A Chloroplast stem-loop binding protein of 41 kDa a, chloroplastic (Arabidopsis thaliana)" AED:0.01 eAED:0.01 QI:41 1 1 1 1 1 6 52 409     | 9.288<br>85 | -1.198          | 0.0039<br>5 |                   | P:GO:0006457;<br>F:GO:0046914;<br>P:GO:1901671                                   |
| <b>Xvis03_221799-PA</b> | processed-gene-5.86-mRNA-1 protein Name:"Similar to LHCB5 Chlorophyll a-b binding protein CP26, chloroplastic (Arabidopsis thaliana)" AED:0.06 eAED:0.06 QI:123 0.8 0.83 1 1 1 6 161 279           | 3.707<br>76 | -<br>1.465<br>2 | 0.0043<br>3 | IPR022796 (PFAM); | F:GO:0003735;<br>C:GO:0005840;<br>P:GO:0006412                                   |
| <b>Xvis03_225066-PA</b> | processed-gene-0.82-mRNA-1 protein Name:"Similar to Chlorophyll a-b binding protein, chloroplastic (Spinacia oleracea)" AED:0.00 eAED:0.00 QI:0 -1 0 1 -1 1 1 0 268                                | 4.243<br>2  | -<br>1.304<br>9 | 0.0045<br>7 | IPR022796 (PFAM); | F:GO:0003824;<br>F:GO:0050662                                                    |
| <b>Xvis03_203608-PA</b> | processed-gene-32.69-mRNA-1 protein Name:"Similar to PNSL1 Photosynthetic NDH subunit of luminal location 1, chloroplastic (Arabidopsis thaliana)" AED:0.12 eAED:0.08 QI:81 1 0.85 1 1 1 7 565 263 | 0.923<br>83 | -<br>2.058<br>2 | 0.0052      | IPR002683 (PFAM); | P:GO:0009765;<br>C:GO:0016020                                                    |
| <b>Xvis03_218527-PA</b> | augustus-gene-7.89-mRNA-1 protein Name:"Similar to FBPan1 Fructose-1,6-bisphosphatase, cytosolic (Musa acuminata)" AED:0.29 eAED:0.29 QI:151 0.63 0.75 1 0.54 0.66 12 242 350                      | 2.849<br>07 | -<br>1.559<br>2 | 0.0061<br>2 | IPR028343         | P:GO:0009765;<br>C:GO:0016020                                                    |
| <b>Xvis03_224654-PA</b> | processed-gene-1.9-mRNA-1 protein Name:"Similar to CAB21 Chlorophyll a-b binding protein 21, chloroplastic (Nicotiana tabacum)" AED:0.11 eAED:0.11 QI:0 0 0 0.5 1 1 2 0 328                        | 2.583<br>11 | -<br>1.519<br>3 | 0.0068<br>4 | IPR023329         | F:GO:0005509;<br>C:GO:0009523;<br>C:GO:0009654;<br>P:GO:0015979;<br>C:GO:0019898 |
| <b>Xvis03_210597-PA</b> | augustus-gene-8.18-mRNA-1 protein Name:"Similar to Atlg67280 Probable lactoylglutathione lyase, chloroplast (Arabidopsis thaliana)" AED:0.06 eAED:0.06 QI:224 1 1 1 1 1 9 419 372                  | 2.837<br>97 | -1.597          | 0.0070<br>3 | IPR029068         | P:GO:0005975;<br>F:GO:0016791;<br>F:GO:0042132                                   |
| <b>Xvis03_213652-PA</b> | processed-gene-16.266-mRNA-1 protein Name:"Similar to RPL4 50S ribosomal protein L4, chloroplastic (Nicotiana tabacum)" AED:0.18 eAED:0.18 QI:0 -1 0 1 -1 1 1 0 272                                | 2.157<br>86 | -<br>1.756<br>4 | 0.0070<br>7 | IPR013005         | P:GO:0009765;<br>C:GO:0016020                                                    |
| <b>Xvis03_202672-PA</b> | processed-gene-54.103-mRNA-1 protein Name:"Similar to HEMC Porphobilinogen deaminase, chloroplastic (Oryza sativa subsp. japonica)" AED:0.01 eAED:0.01 QI:117 1 1 1 1 1 5 327 378                  | 3.145<br>77 | -<br>1.466<br>7 | 0.0073<br>6 | IPR000860         | F:GO:0004462;<br>F:GO:0046872                                                    |
| <b>Xvis03_207337-PA</b> | processed-gene-10.83-mRNA-1 protein Name:"Similar to rps5 30S ribosomal protein S5, chloroplastic (Arabidopsis thaliana)" AED:0.00 eAED:0.00 QI:186 1 1 1 1 1 2 216 309                            | 3.171<br>84 | -<br>1.462<br>9 | 0.0075<br>6 | IPR014721         | F:GO:0003735;<br>C:GO:0005840;<br>P:GO:0006412                                   |

|                         |                                                                                                                                                                                |             |                 |             |                          |                                                                                  |
|-------------------------|--------------------------------------------------------------------------------------------------------------------------------------------------------------------------------|-------------|-----------------|-------------|--------------------------|----------------------------------------------------------------------------------|
| <b>Xvis03_223438-PA</b> | augustus-gene-1.2-mRNA-1 protein Name:"Similar to APX4 Probable L-ascorbate peroxidase 4 (Oryza sativa subsp. japonica)" AED:0.10 eAED:0.10 QI:188 1 1 1 1 9 226 284           | 3.419<br>37 | -<br>1.425<br>4 | 0.0082<br>8 | IPR002207                | F:GO:0004418;<br>P:GO:0033014                                                    |
| <b>Xvis03_225066-PA</b> | processed-gene-0.82-mRNA-1 protein Name:"Similar to Chlorophyll a-b binding protein, chloroplastic (Spinacia oleracea)" AED:0.00 eAED:0.00 QI:0 -1 0 1 -1 1 1 0 268            | 2.783<br>97 | -<br>1.416<br>4 | 0.0093<br>2 | IPR0227<br>96<br>(PFAM); | F:GO:0003723;<br>F:GO:0003735;<br>C:GO:0005840;<br>P:GO:0006412;<br>C:GO:0015935 |
| <b>Xvis03_207668-PA</b> | processed-gene-12.85-mRNA-1 protein Name:"Similar to PETH Ferredoxin--NADP reductase, leaf isozyme, chloroplastic (Pisum sativum)" AED:0.14 eAED:0.14 QI:231 1 1 1 1 9 392 366 | 9.063<br>96 | -<br>0.940<br>5 | 0.0094<br>2 | IPR001709                | F:GO:0004601;<br>P:GO:0006979;<br>F:GO:0020037;<br>P:GO:0055114                  |
| <b>Xvis03_211745-PA</b> | augustus-gene-13.21-mRNA-1 protein Name:"Similar to TPIP1 Triosephosphate isomerase, cytosolic (Petunia hybrida)" AED:0.34 eAED:0.34 QI:46 0.88 0.8 0.9 1 1 10 0 326           | 5.568<br>14 | -<br>1.139<br>2 | 0.0097<br>7 | IPR000652                | P:GO:0009765;<br>C:GO:0016020                                                    |
| <b>Xvis03_219001-PA</b> | processed-gene-2.79-mRNA-1 protein Name:"Similar to Transketolase, chloroplastic (Solanum tuberosum)" AED:0.04 eAED:0.04 QI:238 1 1 1 1 1 7 473 742                            | 12.56<br>51 | -0.754<br>9     | 0.0110<br>9 | IPR0054<br>75<br>(PFAM)  | F:GO:0016491;<br>P:GO:0055114                                                    |
| <b>Xvis03_213345-PA</b> | augustus-gene-10.80-mRNA-1 protein Name:"Similar to PGMP Phosphoglucomutase, chloroplastic (Solanum tuberosum)" AED:0.14 eAED:0.14 QI:0 0.88 0.94 1 0.88 0.89 19 523 691       | 3.167<br>3  | -<br>1.382<br>4 | 0.0121<br>9 | IPR005841                | F:GO:0003824;<br>F:GO:0004807;<br>P:GO:0006096                                   |
| <b>Xvis03_217041-PA</b> | augustus-gene-12.20-mRNA-1 protein Name:"Similar to CPN21 20 kDa chaperonin, chloroplastic (Arabidopsis thaliana)" AED:0.12 eAED:0.12 QI:32 0.33 0.71 0.71 1 1 7 174 298       | 5.079<br>52 | -<br>1.101<br>8 | 0.0123      | IPR020818                | F:GO:0003824;<br>F:GO:0004802                                                    |
| <b>Xvis03_218722-PA</b> | augustus-gene-3.37-mRNA-1 protein Name:"Similar to ATP synthase subunit delta', mitochondrial (Ipomoea batatas)" AED:0.20 eAED:0.20 QI:67 0 0.25 0.5 0.33 0.75 4 0 208         | 0.935<br>03 | -<br>1.859<br>7 | 0.0126<br>6 | IPR036771                | P:GO:0005975;<br>F:GO:0016868;<br>P:GO:0071704                                   |

|                         |                                                                                                                                                                                                                       |             |                 |             |                                     |                                                |
|-------------------------|-----------------------------------------------------------------------------------------------------------------------------------------------------------------------------------------------------------------------|-------------|-----------------|-------------|-------------------------------------|------------------------------------------------|
| <b>Xvis03_200894-PA</b> | augustus-gene-100.71-mRNA-1 protein Name:"Similar to CURVATURE THYLAKOID 1D, chloroplastic (Arabidopsis thaliana)" AED:0.11 eAED:0.11<br>QI:0 0.42 0.5 0.62 1 1 8 520 390                                             | 1.440<br>97 | -               | 0.0128<br>5 | IPR0255<br>64<br>(PFAM              | P:GO:0006457                                   |
| <b>Xvis03_220998-PA</b> | augustus-gene-7.121-mRNA-1 protein Name:"Similar to ADG2 Glucose-1-phosphate adenylyltransferase large subunit 1, chloroplastic (Arabidopsis thaliana)" AED:0.11 eAED:0.11<br>QI:196 0.92 0.86 1 0.85 0.86 15 136 540 | 4.011<br>3  | -<br>1.179<br>7 | 0.0129<br>3 | G3DSA:2.160<br>.1 0.10<br>(GENE3D); | P:GO:0015986;<br>C:GO:0045261;<br>F:GO:0046933 |
| <b>Xvis03_221570-PA</b> | augustus-gene-2.10-mRNA-1 protein Name:"Similar to LSF1 Phosphoglucan phosphatase LSF1, chloroplastic (Arabidopsis thaliana)" AED:0.06 eAED:0.06<br>QI:233 0.83 0.71 1 0.5 0.42 7 831 301                             | 4.039<br>39 | -<br>1.309<br>6 | 0.0129<br>8 | G3DSA:2.30.4<br>2<br>.10 (GENE3D);  | C:GO:0009579                                   |
| <b>Xvis03_206281-PA</b> | augustus-gene-15.74-mRNA-1 protein Name:"Similar to CYCL Cytochrome c1-1, heme protein, mitochondrial (Solanum tuberosum)" AED:0.28 eAED:0.28<br>QI:33 0.85 0.87 1 1 1 8 457 361                                      | 1.353<br>25 | -<br>1.692<br>7 | 0.0131<br>7 | IPR0023<br>26<br>(PRINTS<br>);      | P:GO:0009058;<br>F:GO:0016779                  |
| <b>Xvis03_211268-PA</b> | processed-gene-9.25-mRNA-1 protein Name:"Similar to Vacuolar-processing enzyme (Citrus sinensis)" AED:0.07 eAED:0.07<br>QI:3 1 1 1 1 9 417 590                                                                        | 0.810<br>8  | -<br>1.873<br>3 | 0.0137<br>3 | IPR0010<br>96<br>(PRINTS<br>);      | F:GO:0005515                                   |
| <b>Xvis03_215883-PA</b> | processed-gene-4.2-mRNA-1 protein Name:"Similar to RPL8 60S ribosomal protein L8 (Solanum lycopersicum)" AED:0.00 eAED:0.00<br>QI:71 1 1 1 1 1 2 167 261                                                              | 2.481<br>07 | -<br>1.488<br>8 | 0.0141<br>9 | IPR014726                           | F:GO:0009055;<br>F:GO:0020037                  |
| <b>Xvis03_218222-PA</b> | augustus-gene-8.105-mRNA-1 protein Name:"Similar to CURT1A Protein CURVATURE THYLAKOID 1A, chloroplastic (Arabidopsis thaliana)" AED:0.16 eAED:0.16<br>QI:215 1 1 1 0.8 0.66 6 98 167                                 | 2.179<br>54 | -<br>1.573<br>9 | 0.0144<br>2 | IPR0255<br>64<br>(PFAM);            | P:GO:0006508;<br>F:GO:0008233                  |

|                         |                                                                                                                                                                                          |             |                 |             |                                    |                                                                                  |
|-------------------------|------------------------------------------------------------------------------------------------------------------------------------------------------------------------------------------|-------------|-----------------|-------------|------------------------------------|----------------------------------------------------------------------------------|
| <b>Xvis03_205605-PA</b> | processed-gene-17.119-mRNA-1 protein Name:"Similar to At1g09760 U2 small nuclear ribonucleoprotein A' (Arabidopsis thaliana)" AED:0.23 eAED:0.27<br>QI:0 0.83 0.71 1 1 1 7 448 347       | 1.146<br>94 | -1.752          | 0.0145<br>9 | PF1458<br>0<br>(PFAM<br>);         | F:GO:0003723;<br>F:GO:0003735;<br>C:GO:0005840;<br>P:GO:0006412;<br>C:GO:0015934 |
| <b>Xvis03_220187-PA</b> | processed-gene-5.6-mRNA-1 protein Name:"Similar to HIR1 Hypersensitive-induced response protein 1 (Arabidopsis thaliana)" AED:0.13 eAED:0.13<br>QI:38 0.6 0.83 0.83 0.8 0.66 6 280 307   | 0.674<br>39 | -<br>1.874<br>1 | 0.0145<br>9 | G3DSA:3.30.47<br>9.30<br>(GENE3D); | C:GO:0009579                                                                     |
| <b>Xvis03_220863-PA</b> | processed-gene-0.82-mRNA-1 protein Name:"Similar to RPL3 60S ribosomal protein L3 (Oryza sativa subsp. japonica)" AED:0.08 eAED:0.08 QI:54 1 1 1 1 1 6 258 389                           | 3.214<br>93 | -<br>1.416<br>2 | 0.0147<br>7 | G3DSA:3.30.14<br>30.10 ();         | F:GO:0005515                                                                     |
| <b>Xvis03_224754-PA</b> | processed-gene-1.55-mRNA-1 protein Name:"Similar to At3g10130 Heme-binding-like protein At3g10130, chloroplastic (Arabidopsis thaliana)" AED:0.02 eAED:0.02 QI:0 -1 0 1 -1 1 1 0 209     | 0.969<br>6  | -<br>1.844<br>9 | 0.0148<br>3 | IPR0069<br>17<br>(PFAM);           | no GO terms                                                                      |
| <b>Xvis03_208987-PA</b> | augustus-gene-4.4-mRNA-1 protein Name:"Similar to BGAL9 Beta-galactosidase 9 (Arabidopsis thaliana)" AED:0.06 eAED:0.06 QI:63 1 1 1 0.94 0.94 19 309 904                                 | 4.031<br>6  | -<br>1.172<br>1 | 0.0149<br>7 | IPR0019<br>44<br>(PRINTS<br>);     | F:GO:0003735;<br>C:GO:0005840;<br>P:GO:0006412                                   |
| <b>Xvis03_225829-PA</b> | augustus-gene-0.17-mRNA-1 protein Name:"Similar to LHCA1 Chlorophyll a-b binding protein 6, chloroplastic (Arabidopsis thaliana)" AED:0.45 eAED:0.45<br>QI:0 0.44 0.4 0.5 1 1 10 334 459 | 2.896<br>55 | -<br>1.351<br>9 | 0.0149<br>9 | PF0246<br>6<br>(PFAM<br>);         | no GO terms                                                                      |
| <b>Xvis03_207774-PA</b> | processed-gene-21.50-mRNA-1 protein Name:"Similar to Transketolase, chloroplastic (Solanum tuberosum)" AED:0.17 eAED:0.17<br>QI:154 0.85 0.75 1 1 1 8 0 716                              | 12.19<br>63 | -<br>0.723<br>8 | 0.0160<br>5 | IPR0054<br>75<br>(PFAM)            | F:GO:0004553;<br>P:GO:0005975;<br>F:GO:0030246                                   |
| <b>Xvis03_216387-PA</b> | augustus-gene-11.65-mRNA-1 protein Name:"Similar to Alpha-galactosidase (Coffea arabica)" AED:0.16 eAED:0.16<br>QI:81 1 1 1 0.92 0.92 14 139 642                                         | 3.489<br>55 | -<br>1.172<br>2 | 0.0161      | IPR0022<br>41<br>(PRINTS<br>)      | P:GO:0009765;<br>C:GO:0016020                                                    |



|                         |                                                                                                                                                                                                                                                              |             |                 |             |                        |                                                                                                   |
|-------------------------|--------------------------------------------------------------------------------------------------------------------------------------------------------------------------------------------------------------------------------------------------------------|-------------|-----------------|-------------|------------------------|---------------------------------------------------------------------------------------------------|
| <b>Xvis03_216480-PA</b> | augustus-gene-6.109-mRNA-1<br>protein Name:"Similar to UVR8<br>Ultraviolet-B receptor UVR8<br>(Arabidopsis thaliana)" AED:0.10<br>eAED:0.10<br>QI:223 0.9 1 1 1 1 1 1 290 403                                                                                | 1.054<br>63 | -<br>1.779<br>3 | 0.0168<br>1 | IPR000408<br>(PRINTS); | F:GO:0003824                                                                                      |
| <b>Xvis03_224225-PA</b> | augustus-gene-0.55-mRNA-1 protein<br>Name:"Similar to TPIP1<br>Triosephosphate isomerase,<br>chloroplastic (Spinacia oleracea)"<br>AED:0.32 eAED:0.32<br>QI:0 0 0 0.55 0.87 1 9 0 311                                                                        | 5.334<br>33 | -<br>1.076<br>5 | 0.0168<br>7 | IPR013785)             | F:GO:0003824;<br>F:GO:0004553;<br>P:GO:0005975                                                    |
| <b>Xvis03_212711-PA</b> | processed-gene-16.130-mRNA-1<br>protein Name:"Similar to LHCB4.2<br>Chlorophyll a-b binding protein<br>CP29.2, chloroplastic (Arabidopsis<br>thaliana)" AED:0.05 eAED:0.05<br>QI:1875 1 1 1 0.5 0.33 3 204 289                                               | 5.229<br>23 | -<br>1.002<br>2 | 0.0170<br>4 | IPR022796<br>(PFAM     | F:GO:0009881;<br>P:GO:0010224;<br>F:GO:0042803                                                    |
| <b>Xvis03_223588-PA</b> | processed-gene-1.56-mRNA-1<br>protein Name:"Similar to<br>VIT_19s0014g02480 Probable<br>bifunctional methylthioribulose-1-<br>phosphate dehydratase/enolase-<br>phosphatase E1 1 (Vitis vinifera)"<br>AED:0.24 eAED:0.24<br>QI:0 0.9 0.90 0.90 1 1 1 237 411 | 2.125<br>07 | -<br>1.450<br>9 | 0.0172<br>6 | IPR036409              | F:GO:0003824;<br>F:GO:0004807;<br>P:GO:0006096                                                    |
| <b>Xvis03_224459-PA</b> | augustus-gene-1.13-mRNA-1 protein<br>Name:"Similar to RABA2A Ras-<br>related protein RABA2a (Arabidopsis<br>thaliana)" AED:0.02 eAED:0.02<br>QI:202 1 1 1 1 1 2 509 220                                                                                      | 1.266<br>09 | -<br>1.612<br>3 | 0.0172<br>6 | PR00449<br>(PRINTS     | P:GO:0009765;<br>C:GO:0016020                                                                     |
| <b>Xvis03_213988-PA</b> | augustus-gene-11.18-mRNA-1<br>protein Name:"Similar to PAB1<br>Proteasome subunit alpha type-2<br>(Oryza sativa subsp. japonica)"<br>AED:0.05 eAED:0.05<br>QI:70 1 1 1 1 1 10 615 222                                                                        | 2.815<br>4  | -<br>1.363<br>4 | 0.0177<br>8 | IPR029055              | F:GO:0000287;<br>C:GO:0005737;<br>F:GO:0016787;<br>P:GO:0019509;<br>F:GO:0043874;<br>F:GO:0046872 |
| <b>Xvis03_215165-PA</b> | augustus-gene-14.29-mRNA-1<br>protein Name:"Similar to EPHX2<br>Bifunctional epoxide hydrolase 2<br>(Sus scrofa)" AED:0.25 eAED:0.25<br>QI:33 1 1 1 0.75 0.6 5 416 321                                                                                       | 1.403<br>31 | -<br>1.622<br>8 | 0.0185<br>8 | IPR000073<br>(PRINTS); | F:GO:0003924;<br>F:GO:0005525                                                                     |
| <b>Xvis03_216531-PA</b> | augustus-gene-9.118-mRNA-1<br>protein Name:"Similar to RPL3 60S<br>ribosomal protein L3 (Oryza sativa                                                                                                                                                        | 3.434<br>94 | -1.266          | 0.0209<br>3 | IPR000597<br>(PFAM);   | F:GO:0004175;<br>F:GO:0004298;<br>C:GO:0005839;                                                   |

|                         |                                                                                                                                                                                              |             |        |             |                        |                                                                 |
|-------------------------|----------------------------------------------------------------------------------------------------------------------------------------------------------------------------------------------|-------------|--------|-------------|------------------------|-----------------------------------------------------------------|
|                         | subsp. japonica)" AED:0.07                                                                                                                                                                   |             |        |             |                        | P:GO:0006511;                                                   |
|                         | eAED:0.07                                                                                                                                                                                    |             |        |             |                        | C:GO:0019773;                                                   |
|                         | QI:0 1 0.83 1 1 0.83 6 237 407                                                                                                                                                               |             |        |             |                        | P:GO:0051603                                                    |
| <b>Xvis03_215806-PA</b> | processed-gene-9.114-mRNA-1 protein Name:"Similar to ANN1 Annexin D1 (Arabidopsis thaliana)" AED:0.04 eAED:0.04 QI:119 1 1 1 1 5 186 316                                                     | 2.396<br>82 | -      | 0.0211<br>7 | IPR001464<br>(PRINTS); | F:GO:0003824                                                    |
| <b>Xvis03_224225-PA</b> | augustus-gene-0.55-mRNA-1 protein Name:"Similar to TPIP1 Triosephosphate isomerase, chloroplastic (Spinacia oleracea)" AED:0.32 eAED:0.32 QI:0 0 0 0.55 0.87 1 9 0 311                       | 1.629<br>89 | -      | 0.0213<br>4 | IPR013785              | F:GO:0003735;<br>C:GO:0005840;<br>P:GO:0006412                  |
| <b>Xvis03_201588-PA</b> | augustus-gene-28.7-mRNA-1 protein Name:"Similar to NAD-ME1 NAD-dependent malic enzyme 1, mitochondrial (Arabidopsis thaliana)" AED:0.22 eAED:0.22 QI:0 0 0.77 0.78 0.86 0.77 0.82 23 290 790 | 1.195<br>84 | -1.668 | 0.0213<br>4 | IPR001891<br>(PRINTS); | F:GO:0005509;<br>F:GO:0005544                                   |
| <b>Xvis03_219722-PA</b> | augustus-gene-9.73-mRNA-1 protein Name:"Similar to CAB36 Chlorophyll a-b binding protein 36, chloroplastic (Nicotiana tabacum)" AED:0.36 eAED:0.36 QI:240 1 1 1 1 1 2 393 264                | 3.822<br>32 | -      | 0.0223<br>2 | IPR022796<br>(PFAM     | F:GO:0003824;<br>F:GO:0004807;<br>P:GO:0006096                  |
| <b>Xvis03_221307-PA</b> | processed-gene-5.33-mRNA-1 protein Name:"Similar to Peptide-N4-(N-acetyl-beta-glucosaminyl)asparagine amidase A (Prunus dulcis)" AED:0.04 eAED:0.04 QI:0 -1 0 1 -1 1 1 0 612                 | 1.814<br>13 | -      | 0.0226      | IPR021102<br>(PFAM)    | F:GO:0004470;<br>F:GO:0004471;<br>F:GO:0051287;<br>P:GO:0055114 |
| <b>Xvis03_205319-PA</b> | processed-gene-30.54-mRNA-1 protein Name:"Similar to PSAH1 Photosystem I reaction center subunit VI-1, chloroplastic (Arabidopsis thaliana)" AED:0.09 eAED:0.09 QI:15 1 1 1 1 1 3 336 145    | 1.433<br>39 | -      | 0.0230<br>7 | IPR004928<br>(PFAM);   | P:GO:0009765;<br>C:GO:0016020                                   |
| <b>Xvis03_209971-PA</b> | augustus-gene-1.88-mRNA-1 protein Name:"Similar to IMPL1 Phosphatase IMPL1, chloroplastic (Arabidopsis thaliana)" AED:0.08 eAED:0.08                                                         | 0.849<br>49 | -      | 0.0232<br>9 | IPR020552<br>(PRINTS); | no GO terms                                                     |

QI:62|1|1|1|0.9|0.81|11|343|347

|                         |                                                                                                                                                                                                        |             |                 |             |                       |                                                |
|-------------------------|--------------------------------------------------------------------------------------------------------------------------------------------------------------------------------------------------------|-------------|-----------------|-------------|-----------------------|------------------------------------------------|
| <b>Xvis03_223144-PA</b> | processed-gene-3.56-mRNA-1<br>protein Name:"Similar to RBCS1 Ribulose biphosphate carboxylase small chain, chloroplastic (Musa acuminata)" AED:0.05 eAED:0.05<br>QI:145 1 1 1 1 1 3 356 174            | 11.93<br>72 | -<br>0.843<br>6 | 0.025       | IPR024681<br>(PRINTS) | C:GO:0009522;<br>C:GO:0009538;<br>P:GO:0015979 |
| <b>Xvis03_202356-PA</b> | processed-gene-29.12-mRNA-1<br>protein Name:"Similar to PBG1 Proteasome subunit beta type-4 (Arabidopsis thaliana)" AED:0.13 eAED:0.13<br>QI:0 0.71 0.75 0.87 1 1 8 335 329                            | 2.244<br>39 | -1.361<br>9     | 0.0257      | IPR029055             | F:GO:0008934;<br>P:GO:0046854;<br>P:GO:0046855 |
| <b>Xvis03_212711-PA</b> | processed-gene-16.130-mRNA-1<br>protein Name:"Similar to LHCB4.2 Chlorophyll a-b binding protein CP29.2, chloroplastic (Arabidopsis thaliana)" AED:0.05 eAED:0.05<br>QI:1875 1 1 1 0.5 0.33 3 204 289  | 4.291<br>18 | -<br>1.009<br>8 | 0.0271<br>7 | IPR022796<br>(PFAM)   | no GO terms                                    |
| <b>Xvis03_213887-PA</b> | remorin-like isoform X2                                                                                                                                                                                | 3.120<br>09 | -<br>1.218<br>4 | 0.0272<br>2 | IPR005516<br>(PFAM)   | F:GO:0004298;<br>C:GO:0005839;<br>P:GO:0051603 |
| <b>Xvis03_202061-PA</b> | processed-gene-6.69-mRNA-1<br>protein Name:"Similar to RPL9 50S ribosomal protein L9, chloroplastic (Arabidopsis thaliana)" AED:0.06 eAED:0.06<br>QI:100 1 1 1 0.83 0.71 7 568 196                     | 1.473<br>36 | -<br>1.555<br>7 | 0.0273<br>5 | IPR020069<br>(PFAM)   | P:GO:0009765;<br>C:GO:0016020                  |
| <b>Xvis03_202428-PA</b> | augustus-gene-35.90-mRNA-1<br>protein Name:"Similar to CURT1A Protein CURVATURE THYLAKOID 1A, chloroplastic (Arabidopsis thaliana)" AED:0.22 eAED:0.42<br>QI:0 0.75 0.6 1 0.75 0.6 5 269 208           | 2.031<br>14 | -<br>1.420<br>3 | 0.0289<br>7 | IPR025564<br>(PFAM)   | no GO terms                                    |
| <b>Xvis03_203635-PA</b> | augustus-gene-35.43-mRNA-1<br>protein Name:"Similar to CLPP5 ATP-dependent Clp protease proteolytic subunit 5, chloroplastic (Arabidopsis thaliana)" AED:0.40 eAED:0.40<br>QI:0 1 0.71 1 1 1 7 484 324 | 1.511<br>63 | -<br>1.524<br>8 | 0.0292<br>8 | IPR001907<br>(PRINTS) | F:GO:0003735;<br>C:GO:0005840;<br>P:GO:0006412 |

|                         |                                                                                                                                                                                                           |             |                 |             |                                                         |                                                                                  |
|-------------------------|-----------------------------------------------------------------------------------------------------------------------------------------------------------------------------------------------------------|-------------|-----------------|-------------|---------------------------------------------------------|----------------------------------------------------------------------------------|
| <b>Xvis03_208040-PA</b> | processed-gene-21.10-mRNA-1 protein Name:"Similar to SHM4 Serine hydroxymethyltransferase 4 (Arabidopsis thaliana)" AED:0.05 eAED:0.05 QI:76 1 1 1 1 4 235 515                                            | 15.57<br>43 | -<br>0.612      | 0.0293<br>1 | IPR015421                                               | C:GO:0009579                                                                     |
| <b>Xvis03_217729-PA</b> | processed-gene-11.5-mRNA-1 protein Name:"Similar to PETE Plastocyanin minor isoform, chloroplastic (Arabidopsis thaliana)" AED:0.37 eAED:0.37 QI:0 0 0 0.16 1 1 6 0 366                                   | 2.785<br>06 | -<br>1.268<br>9 | 0.0302<br>2 | IPR0023<br>87<br>(PRINTS                                | F:GO:0004252;<br>P:GO:0006508                                                    |
| <b>Xvis03_225147-PA</b> | augustus-gene-0.41-mRNA-1 protein Name:"Similar to CAB6A Chlorophyll a-b binding protein 6A, chloroplastic (Solanum lycopersicum)" AED:0.00 eAED:0.00 QI:106 1 1 1 1 1 3 75 204                           | 3.862<br>29 | -<br>1.046<br>7 | 0.0309<br>5 | IPR022796<br>(PFAM);<br>SSF103511<br>(SUPERFAMI<br>L Y) | F:GO:0003824;<br>F:GO:0004372;<br>P:GO:0019264;<br>F:GO:0030170;<br>P:GO:0035999 |
| <b>Xvis03_216230-PA</b> | Basic secretory protease                                                                                                                                                                                  | 1.585<br>22 | -1.482          | 0.0310<br>8 | IPR007541<br>(PFAM)                                     | F:GO:0005507;<br>F:GO:0009055                                                    |
| <b>Xvis03_217514-PA</b> | processed-gene-7.97-mRNA-1 protein Name:"Similar to SPAC9E9.15 Uncharacterized protein C9E9.15 (Schizosaccharomyces pombe (strain 972 / ATCC 24843))" AED:0.14 eAED:0.14 QI:59 0.93 0.87 1 1 1 16 145 594 | 3.507<br>08 | -<br>1.103<br>5 | 0.0317<br>2 | G3DSA:2.60.<br>12 0.430                                 | P:GO:0009765;<br>C:GO:0016020                                                    |
| <b>Xvis03_207968-PA</b> | augustus-gene-15.42-mRNA-1 protein Name:"Similar to CAP10A Chlorophyll a-b binding protein CP24 10A, chloroplastic (Solanum lycopersicum)" AED:0.00 eAED:0.00 QI:218 1 1 1 1 1 2 259 254                  | 0.648<br>29 | -1.688          | 0.0319<br>8 | IPR023329                                               | no GO terms                                                                      |
| <b>Xvis03_212120-PA</b> | augustus-gene-8.8-mRNA-1 protein Name:"Similar to CEST Protein CHLOROPLAST ENHANCING STRESS TOLERANCE, chloroplastic (Oryza sativa subsp. japonica)" AED:0.04 eAED:0.04 QI:85 1 1 1 1 1 6 455 259         | 1.043<br>13 | -<br>1.619<br>3 | 0.0320<br>7 | PTHR33672:<br>SF 3<br>(PANTHER);                        | P:GO:0032981                                                                     |
| <b>Xvis03_223438-PA</b> | augustus-gene-1.2-mRNA-1 protein Name:"Similar to APX4 Probable L-ascorbate peroxidase 4 (Oryza sativa subsp. japonica)" AED:0.10 eAED:0.10 QI:188 1 1 1 1 1 9 226 284                                    | 2.609<br>42 | -<br>1.204<br>9 | 0.0321      | IPR0022<br>07<br>(PRINTS<br>);                          | P:GO:0009765;<br>C:GO:0016020                                                    |

|                         |                                                                                                                                                                                                                             |             |                 |             |                               |                                                                                                                                                                       |
|-------------------------|-----------------------------------------------------------------------------------------------------------------------------------------------------------------------------------------------------------------------------|-------------|-----------------|-------------|-------------------------------|-----------------------------------------------------------------------------------------------------------------------------------------------------------------------|
| <b>Xvis03_211391-PA</b> | processed-gene-20.57-mRNA-1<br>protein Name:"Similar to GGH2<br>Gamma-glutamyl hydrolase 2<br>(Arabidopsis thaliana)" AED:0.20<br>eAED:0.20 QI:39 1 0.85 1 1 1 7 0 302                                                      | 2.254<br>12 | -<br>1.310<br>1 | 0.0322<br>2 | IPR0116<br>97<br>(PFAM        | C:GO:0009535;<br>P:GO:0048564;<br>P:GO:0080183                                                                                                                        |
| <b>Xvis03_224849-PA</b> | processed-gene-1.76-mRNA-1<br>protein Name:"Similar to FKBP19<br>Peptidyl-prolyl cis-trans isomerase<br>FKBP19, chloroplastic (Arabidopsis<br>thaliana)" AED:0.46 eAED:0.49<br>QI:0 0.72 0.83 0.91 0.90 0.83 12 203 3<br>20 | 0.704<br>45 | -<br>1.651<br>5 | 0.0329<br>7 | IPR0011<br>79<br>(PFAM)       | F:GO:0004601;<br>P:GO:0006979;<br>F:GO:0020037;<br>P:GO:0055114                                                                                                       |
| <b>Xvis03_220733-PA</b> | processed-gene-1.13-mRNA-1<br>protein Name:"Similar to CAT1<br>Catalase-1 (Triticum aestivum)"<br>AED:0.19 eAED:0.19<br>QI:0 0 0 0.66 1 1 9 0 623                                                                           | 6.462<br>83 | -<br>0.862<br>1 | 0.0330<br>2 | IPR0180<br>28<br>(PRINTS<br>) | F:GO:0008242;<br>F:GO:0016787                                                                                                                                         |
| <b>Xvis03_223095-PA</b> | augustus-gene-3.96-mRNA-1<br>protein Name:"Similar to petC<br>Cytochrome b6-f complex iron-<br>sulfur subunit,<br>chloroplastic (Oryza sativa subsp.<br>japonica)" AED:0.11 eAED:0.11<br>QI:167 0.33 0.75 1 1 1 4 287 178   | 1.792<br>06 | -<br>1.354<br>2 | 0.0338<br>3 | IPR0058<br>05<br>(PRINTS<br>) | no GO terms                                                                                                                                                           |
| <b>Xvis03_216531-PA</b> | augustus-gene-9.118-mRNA-1<br>protein Name:"Similar to RPL3 60S<br>ribosomal protein L3 (Oryza sativa<br>subsp. japonica)" AED:0.07<br>eAED:0.07<br>QI:0 1 0.83 1 1 0.83 6 237 407                                          | 3.111<br>12 | -<br>1.257<br>7 | 0.034       | IPR000597<br>(PFAM)           | F:GO:0004096;<br>P:GO:0006979;<br>F:GO:0020037;<br>P:GO:0055114                                                                                                       |
| <b>Xvis03_220973-PA</b> | augustus-gene-5.51-mRNA-1 protein<br>Name:"Similar to RPS2C 40S<br>ribosomal protein S2-3 (Arabidopsis<br>thaliana)" AED:0.29 eAED:0.29<br>QI:54 1 1 1 0.5 0.33 3 154 274                                                   | 3.119<br>06 | -<br>1.164<br>4 | 0.0349<br>5 | IPR013810<br>(PFAM);          | F:GO:0008121;<br>F:GO:0009496;<br>C:GO:0009507;<br>C:GO:0016020;<br>F:GO:0016491;<br>F:GO:0016679;<br>C:GO:0042651;<br>F:GO:0045158;<br>F:GO:0051537;<br>P:GO:0055114 |
| <b>Xvis03_213605-PA</b> | processed-gene-14.84-mRNA-1<br>protein Name:"Similar to<br>Os08g0288200 Probable adenylate<br>kinase 5, chloroplastic (Oryza sativa<br>subsp. japonica)" AED:0.22<br>eAED:0.22                                              | 0.701<br>86 | -<br>1.619<br>5 | 0.0353<br>4 | IPR000850<br>(PRINTS);        | F:GO:0003735;<br>C:GO:0005840;<br>P:GO:0006412                                                                                                                        |

QI:25|1|0.94|1|1|1|17|0|611

|                         |                                                                                                                                                                                                                                                              |             |                 |             |                       |                                                                                  |
|-------------------------|--------------------------------------------------------------------------------------------------------------------------------------------------------------------------------------------------------------------------------------------------------------|-------------|-----------------|-------------|-----------------------|----------------------------------------------------------------------------------|
| <b>Xvis03_202672-PA</b> | processed-gene-54.103-mRNA-1<br>protein Name:"Similar to HEMC<br>Porphobilinogen deaminase,<br>chloroplastic (Oryza sativa subsp.<br>japonica)" AED:0.01 eAED:0.01<br>QI:117 1 1 1 1 1 5 327 378                                                             | 4.014<br>03 | -<br>1.002<br>4 | 0.0354<br>7 | IPR000860<br>(PRINTS) | F:GO:0003723;<br>F:GO:0003735;<br>C:GO:0005840;<br>P:GO:0006412;<br>C:GO:0015935 |
| <b>Xvis03_207337-PA</b> | processed-gene-10.83-mRNA-1<br>protein Name:"Similar to rps5 30S<br>ribosomal protein S5, chloroplastic<br>(Arabidopsis thaliana)" AED:0.00<br>eAED:0.00 QI:186 1 1 1 1 2 216 309                                                                            | 0.960<br>41 | -<br>1.583<br>2 | 0.0364<br>9 | IPR014721             | F:GO:0004017;<br>F:GO:0005524;<br>P:GO:0006139;<br>F:GO:0016776;<br>F:GO:0019205 |
| <b>Xvis03_207968-PA</b> | augustus-gene-15.42-mRNA-1<br>protein Name:"Similar to CAP10A<br>Chlorophyll a-b binding protein CP24<br>10A, chloroplastic (Solanum<br>lycopersicum)" AED:0.00 eAED:0.00<br>QI:218 1 1 1 1 2 259 254                                                        | 0.921<br>33 | -<br>1.554<br>2 | 0.0365      | IPR023329             | F:GO:0004418;<br>P:GO:0033014                                                    |
| <b>Xvis03_212925-PA</b> | processed-gene-5.93-mRNA-1<br>protein Name:"Similar to PETH<br>Ferredoxin--NADP reductase, leaf-<br>type isozyme, chloroplastic<br>(Nicotiana tabacum)" AED:0.42<br>eAED:0.49 QI:0 0 0 0.8 1 1 5 0 177                                                       | 1.714<br>63 | -<br>1.428<br>8 | 0.0365<br>1 | IPR001433<br>(PFAM)   | F:GO:0003723;<br>F:GO:0003735;<br>C:GO:0005840;<br>P:GO:0006412;<br>C:GO:0015935 |
| <b>Xvis03_211745-PA</b> | augustus-gene-13.21-mRNA-1<br>protein Name:"Similar to TPIP1<br>Triosephosphate isomerase, cytosolic<br>(Petunia hybrida)" AED:0.34<br>eAED:0.34<br>QI:46 0.88 0.8 0.9 1 1 10 0 326                                                                          | 4.984<br>32 | -<br>0.934<br>5 | 0.0373<br>4 | IPR000652             | P:GO:0009765;<br>C:GO:0016020                                                    |
| <b>Xvis03_212711-PA</b> | processed-gene-16.130-mRNA-1<br>protein Name:"Similar to LHCB4.2<br>Chlorophyll a-b binding protein<br>CP29.2, chloroplastic (Arabidopsis<br>thaliana)" AED:0.05 eAED:0.05<br>QI:1875 1 1 1 0.5 0.33 3 204 289                                               | 3.260<br>57 | -<br>1.066<br>6 | 0.0381<br>8 | IPR022796<br>(PFAM)   | F:GO:0016491;<br>P:GO:0055114                                                    |
| <b>Xvis03_223588-PA</b> | processed-gene-1.56-mRNA-1<br>protein Name:"Similar to<br>VIT_19s0014g02480 Probable<br>bifunctional methylthioribulose-1-<br>phosphate dehydratase/enolase-<br>phosphatase E1 1 (Vitis vinifera)"<br>AED:0.24 eAED:0.24<br>QI:0 0.9 0.90 0.90 1 1 1 237 411 | 9.124<br>94 | -<br>0.942<br>2 | 0.0398<br>1 | IPR036409             | F:GO:0003824;<br>F:GO:0004807;<br>P:GO:0006096                                   |

|                         |                                                                                                                                                                                                                          |             |        |             |                               |                                                                                                                                                     |
|-------------------------|--------------------------------------------------------------------------------------------------------------------------------------------------------------------------------------------------------------------------|-------------|--------|-------------|-------------------------------|-----------------------------------------------------------------------------------------------------------------------------------------------------|
| <b>Xvis03_224459-PA</b> | augustus-gene-1.13-mRNA-1 protein<br>Name:"Similar to RABA2A Ras-related protein RABA2a (Arabidopsis thaliana)" AED:0.02 eAED:0.02<br>QI:202 1 1 1 1 1 2 509 220                                                         | 2.841<br>35 | -      | 0.0404      | PR0044<br>9<br>(PRINT<br>S)   | P:GO:0009765;<br>C:GO:0016020                                                                                                                       |
| <b>Xvis03_213988-PA</b> | augustus-gene-11.18-mRNA-1<br>protein Name:"Similar to PAB1<br>Proteasome subunit alpha type-2<br>(Oryza sativa subsp. japonica)"<br>AED:0.05 eAED:0.05<br>QI:70 1 1 1 1 1 10 615 222                                    | 1.456<br>42 | -      | 0.0439<br>6 | IPR029055                     | F:GO:0000287;<br>C:GO:0005737;<br>F:GO:0016787;<br>P:GO:0019509;<br>F:GO:0043874;<br>F:GO:0046872                                                   |
| <b>Xvis03_207968-PA</b> | augustus-gene-15.42-mRNA-1<br>protein Name:"Similar to CAP10A<br>Chlorophyll a-b binding protein CP24<br>10A, chloroplastic (Solanum lycopersicum)" AED:0.00 eAED:0.00<br>QI:218 1 1 1 1 1 2 259 254                     | 1.210<br>25 | -      | 0.0444<br>8 | IPR023329                     | F:GO:0003924;<br>F:GO:0005525                                                                                                                       |
| <b>Xvis03_224672-PA</b> | processed-gene-1.89-mRNA-1<br>protein Name:"Similar to ALATS<br>Alanine--tRNA ligase (Arabidopsis thaliana)" AED:0.10 eAED:0.10<br>QI:33 1 1 1 0.90 0.90 22 389 993                                                      | 5.121<br>35 | -      | 0.0458<br>4 | IPR00231<br>8<br>(PRINTS<br>) | F:GO:0004175;<br>F:GO:0004298;<br>C:GO:0005839;<br>P:GO:0006511;<br>C:GO:0019773;<br>P:GO:0051603                                                   |
| <b>Xvis03_208742-PA</b> | augustus-gene-3.45-mRNA-1<br>protein Name:"Similar to At4g13360<br>3- hydroxyisobutyryl-CoA<br>hydrolase- like protein 3,<br>mitochondrial (Arabidopsis thaliana)" AED:0.08 eAED:0.08<br>QI:31 1 1 1 0.88 0.9 10 444 426 | 2.075<br>78 | -1.188 | 0.0473<br>6 | IPR03225<br>9 (PFAM)          | P:GO:0009765;<br>C:GO:0016020                                                                                                                       |
| <b>Xvis03_219507-PA</b> | augustus-gene-9.55-mRNA-1 protein<br>Name:"Similar to<br>POPTRDRAFT_831870 Biotin<br>carboxylase 1, chloroplastic (Populus trichocarpa)" AED:0.11 eAED:0.11<br>QI:0 1 0.94 1 0.93 0.76 17 386 550                        | 1.254<br>57 | -      | 0.0487<br>9 | IPR00548<br>1 (PFAM)          | F:GO:0000166;<br>F:GO:0003676;<br>F:GO:0004812;<br>F:GO:0004813;<br>F:GO:0005524;<br>C:GO:0005737;<br>P:GO:0006419;<br>P:GO:0043039<br>F:GO:0003860 |
| <b>Xvis03_224372-PA</b> | processed-gene-2.16-mRNA-1<br>protein Name:"Similar to UAM1<br>UDP-arabinopyranose mutase 1<br>(Oryza sativa subsp. japonica)"<br>AED:0.08 eAED:0.08<br>QI:87 1 1 1 1 1 4 347 359                                        | 1.291<br>59 | -      | 0.0489      | IPR03759<br>5 (PFAM)          |                                                                                                                                                     |

|                         |                                                                                                                                                                                                               |             |                 |              |                                                                              |                                                       |
|-------------------------|---------------------------------------------------------------------------------------------------------------------------------------------------------------------------------------------------------------|-------------|-----------------|--------------|------------------------------------------------------------------------------|-------------------------------------------------------|
| <b>Xvis03_200047-PA</b> | augustus-gene-4.43-mRNA-1 protein<br>Name:"Similar to BGLU22 Beta-glucosidase 22 (Oryza sativa subsp. japonica)" AED:0.38 eAED:0.38<br>QI:56 0.9 0.81 1 1 1 1 1 40 465                                        | 0.951<br>13 | -1.505          | 0.0496<br>3  | IPR001360                                                                    | F:GO:0005524;<br>F:GO:0016874;<br>F:GO:0046872        |
| <b>Xvis03_212711-PA</b> | processed-gene-2.106-mRNA-1 protein<br>Name:"Similar to Beta-galactosidase (Asparagus officinalis)"<br>AED:0.13 eAED:0.13<br>QI:277 1 1 1 1 1 19 418 832                                                      | 1.951<br>18 | -<br>1.341<br>2 | 0.0498<br>5  | IPR001944                                                                    | F:GO:0016866;<br>P:GO:0071669                         |
|                         |                                                                                                                                                                                                               | 5.229<br>23 | -<br>3.599<br>1 | 1.84E-<br>09 | P:GO:000976<br>5;<br>C:GO:001602<br>0                                        | F:GO:0004553;<br>P:GO:0005975                         |
| <b>Xvis03_216014-PA</b> | processed-gene-5.37-mRNA-1 protein<br>Name:"Similar to PSAF Photosystem I reaction center subunit III, chloroplastic (Arabidopsis thaliana)" AED:0.24 eAED:0.24<br>QI:0 -1 0 1 -1 1 1 0 232                   | 4.662<br>08 | -<br>1.326<br>6 | 0.0053<br>4  |                                                                              | F:GO:0004553;<br>P:GO:0005975;<br>F:GO:0030246        |
| <b>Xvis03_220507-PA</b> | Xvis03_220507-PA processed-gene-1.26-mRNA-1 protein<br>Name:"Similar to PAP27 Probable inactive purple acid phosphatase 27 (Arabidopsis thaliana)" AED:0.08 eAED:0.08<br>QI:27 1 1 1 1 1 12 227 617           | 0.960<br>41 | -<br>2.079<br>6 | 0.0061<br>4  |                                                                              | P:photosynthesis<br>, light harvesting;<br>C:membrane |
| <b>Xvis03_219507-PA</b> | augustus-gene-9.55-mRNA-1 protein<br>Name:"Similar to POPTRDRAFT_831870 Biotin carboxylase 1, chloroplastic (Populus trichocarpa)" AED:0.11 eAED:0.11<br>QI:0 1 0.94 1 0.93 0.76 17 386 550                   | 1.950<br>77 | -<br>1.779<br>7 | 0.0062<br>2  | F:ATP binding;<br>F:ligase activity;<br>F:metal ion binding                  |                                                       |
| <b>Xvis03_208742-PA</b> | augustus-gene-3.45-mRNA-1 protein<br>Name:"Similar to At4g13360 3-hydroxyisobutyryl-CoA hydrolase-like protein 3, mitochondrial (Arabidopsis thaliana)" AED:0.08 eAED:0.08<br>QI:31 1 1 1 0.88 0.9 10 444 426 | 1.922<br>39 | -<br>1.492<br>5 | 0.0112<br>6  | F:3-hydroxyisobutyryl-CoA hydrolase activity                                 |                                                       |
| <b>Xvis03_224672-PA</b> | processed-gene-1.89-mRNA-1 protein<br>Name:"Similar to ALATS Alanine--tRNA ligase (Arabidopsis thaliana)" AED:0.10 eAED:0.10<br>QI:33 1 1 1 0.90 0.90 22 389 993                                              | 2.560<br>21 | -<br>1.494<br>7 | 0.0116<br>1  | F:nucleic acid binding;<br>F:alanine tRNA ligase activity;<br>F:ATP binding; |                                                       |



C:cytoplasm;  
P:alanyl  
tRNAaminoacyl  
ation

|                         |                                                                                                                                                                                              |         |        |         |                                                                                          |
|-------------------------|----------------------------------------------------------------------------------------------------------------------------------------------------------------------------------------------|---------|--------|---------|------------------------------------------------------------------------------------------|
| <b>Xvis03_224372-PA</b> | processed-gene-2.16-mRNA-1 protein Name:"Similar to UAM1 UDP-arabinopyranose mutase 1 (Oryza sativa subsp. japonica)" AED:0.08 eAED:0.08 QI:87 1 1 1 1 4 347 359                             | 1.04109 | -      | 0.01173 | F:intramolecular transferase activity; P:plant-type cell wall organization or biogenesis |
| <b>Xvis03_200047-PA</b> | augustus-gene-4.43-mRNA-1 protein Name:"Similar to BGLU22 Beta-glucosidase 22 (Oryza sativa subsp. japonica)" AED:0.38 eAED:0.38 QI:56 0.9 0.81 1 1 1 11 40 465                              | 2.0106  | -      | 0.01191 | F:hydrolase activity, hydrolyzing O-glycosyl compounds; P:carbohydrate metabolic process |
| <b>Xvis03_223612-PA</b> | augustus-gene-2.49-mRNA-1 protein Name:"Similar to CEBIP Chitin elicitor-binding protein (Oryza sativa subsp. japonica)" AED:0.27 eAED:0.27 QI:0 0.6 0.5 0.66 1 1 6 353 477                  | 3.49938 | -      | 0.01259 | IPR036779                                                                                |
| <b>Xvis03_213033-PA</b> | processed-gene-15.37-mRNA-1 protein Name:"Similar to zta1 Probable quinone oxidoreductase (Schizosaccharomyces pombe (strain 972 / ATCC 24843))" AED:0.20 eAED:0.20 QI:0 0 0 0.8 1 1 5 0 292 | 0.90109 | -1.882 | 0.01455 | IPR013154 (PFAM);                                                                        |
| <b>Xvis03_225238-PA</b> | augustus-gene-0.18-mRNA-1 protein Name:"Similar to WAXY Granule-bound starch synthase 1, chloroplastic/amyloplastic (Antirrhinum majus)" AED:0.11 eAED:0.11 QI:73 1 1 1 0.92 0.85 14 142 611 | 0.87706 | -      | 0.01633 | IPR013534 (PFAM) no GO terms                                                             |
| <b>Xvis03_210933-PA</b> | augustus-gene-1.32-mRNA-1 protein Name:"Similar to PAP2 Probable inactive purple acid phosphatase 2 (Arabidopsis thaliana)" AED:0.04 eAED:0.04 QI:0 1 0.66 1 0.5 0.33 3 1759 658             | 3.10401 | -      | 0.01696 | IPR015914 (PFAM) P:GO:0055114                                                            |

|                         |                                                                                                                                                                                                                           |             |        |             |                     |                                                                                                                    |
|-------------------------|---------------------------------------------------------------------------------------------------------------------------------------------------------------------------------------------------------------------------|-------------|--------|-------------|---------------------|--------------------------------------------------------------------------------------------------------------------|
| <b>Xvis03_218675-PA</b> | processed-gene-10.89-mRNA-1<br>protein Name:"Similar to AGD2<br>Probable LL-diaminopimelate<br>aminotransferase, chloroplastic<br>(Oryza sativa subsp. japonica)"<br>AED:0.20 eAED:0.20<br>QI:0 0.85 0.75 1 1 1 8 209 407 | 0.983<br>22 | -      | 0.0175<br>5 | IPR004839<br>(PFAM) | F:GO:0004373                                                                                                       |
| <b>Xvis03_212280-PA</b> | processed-gene-6.79-mRNA-1<br>protein Name:"Similar to THI1-2<br>Thiamine thiazole synthase 2,<br>chloroplastic (Vitis vinifera)"<br>AED:0.02 eAED:0.02<br>QI:212 1 1 1 1 1 2 483 354                                     | 3.044<br>48 | -      | 0.0182      | IPR002922           | F:GO:0003993;<br>F:GO:0016787;<br>F:GO:0046872                                                                     |
| <b>Xvis03_205558-PA</b> | augustus-gene-14.7-mRNA-1 protein<br>Name:"Similar to CAB7 Chlorophyll<br>a-b binding protein 7, chloroplastic<br>(Solanum lycopersicum)" AED:0.16<br>eAED:0.16<br>QI:0 0.25 0.4 1 0.75 0.8 5 892 278                     | 0.765<br>17 | -      | 0.0240<br>5 | IPR022796           | F:GO:0003824;<br>F:GO:0008483;<br>P:GO:0009058;<br>F:GO:0030170                                                    |
| <b>Xvis03_205102-PA</b> | processed-gene-9.15-mRNA-1<br>protein Name:"Similar to GOR<br>Glutathione reductase, chloroplastic<br>(Fragment) (Nicotiana tabacum)"<br>AED:0.14 eAED:0.14<br>QI:0 1 0.90 1 0.9 0.81 11 639 590                          | 2.864<br>2  | -      | 0.0247<br>8 | PR00411             | P:GO:0009228                                                                                                       |
| <b>Xvis03_222506-PA</b> | augustus-gene-4.97-mRNA-1 protein<br>Name:"Similar to EDA2 Probable<br>serine protease EDA2 (Arabidopsis<br>thaliana)" AED:0.31 eAED:0.31<br>QI:159 0.92 0.92 1 1 1 14 279 488                                            | 1.767<br>9  | -      | 0.0249<br>7 | IPR029058           | P:GO:0009765;<br>C:GO:0016020                                                                                      |
| <b>Xvis03_225868-PA</b> | augustus-gene-0.5-mRNA-1 protein<br>Name:"Similar to caa43 2-<br>haloacrylate reductase (Burkholderia<br>sp.)" AED:0.18 eAED:0.18<br>QI:0 0.25 0 0.8 0.5 0.4 5 0 313                                                      | 0.847<br>4  | -1.667 | 0.0274<br>4 | IPR013149<br>(PFAM) | F:GO:0004362;<br>P:GO:0006749;<br>F:GO:0016491;<br>P:GO:0045454;<br>F:GO:0050660;<br>F:GO:0050661;<br>P:GO:0055114 |
| <b>Xvis03_204322-PA</b> | processed-gene-9.15-mRNA-1<br>protein Name:"Similar to AFRR<br>Monodehydroascorbate reductase<br>(Solanum lycopersicum)" AED:0.13<br>eAED:0.13<br>QI:138 0.72 0.83 0.83 1 1 12 368 489                                    | 4.197<br>82 | -      | 0.0288<br>8 | PR00368 (           | P:GO:0006508;<br>F:GO:0008236                                                                                      |

|                         |                                                                                                                                                                                                   |             |                 |             |                       |                                                                                                                    |
|-------------------------|---------------------------------------------------------------------------------------------------------------------------------------------------------------------------------------------------|-------------|-----------------|-------------|-----------------------|--------------------------------------------------------------------------------------------------------------------|
| <b>Xvis03_211689-PA</b> | processed-gene-6.93-mRNA-1 protein Name:"Similar to Proteasome subunit beta type-5 (Spinacia oleracea)" AED:0.07 eAED:0.07 QI:0 1 0.87 1 1 1 8 489 310                                            | 2.204<br>52 | -<br>1.270<br>7 | 0.0289<br>9 | IPR000243             | P:GO:0055114                                                                                                       |
| <b>Xvis03_217074-PA</b> | processed-gene-2.49-mRNA-1 protein Name:"Similar to PME35 Probable pectinesterase/pectinesterase inhibitor 35 (Arabidopsis thaliana)" AED:0.36 eAED:0.36 QI:662 1 1 1 1 1 3 218 442               | 2.798<br>6  | -<br>1.409<br>7 | 0.0352<br>3 | IPR035513             | F:GO:0016491;<br>F:GO:0050660;<br>P:GO:0055114                                                                     |
| <b>Xvis03_221017-PA</b> | processed-gene-109.26-mRNA-1 protein Name:"Similar to PPD Pyruvate, phosphate dikinase, chloroplastic (Mesembryanthemum crystallinum)" AED:0.09 eAED:0.09 QI:8 1 1 1 0.89 0.9 20 257 985          | 0.631<br>76 | -<br>1.637<br>5 | 0.0374<br>8 |                       | F:GO:0004175;<br>F:GO:0004298;<br>C:GO:0005839;<br>P:GO:0051603                                                    |
| <b>Xvis03_221989-PA</b> | augustus-gene-2.19-mRNA-1 protein Name:"Similar to dapb3 Dipeptidyl aminopeptidase BIII (Pseudoxanthomonas mexicana)"                                                                             | 0.750<br>18 | -<br>1.628<br>1 | 0.0375<br>8 | IPR011042             | F:GO:0004857;<br>F:GO:0030599;<br>P:GO:0042545                                                                     |
| <b>Xvis03_200779-PA</b> | processed-gene-89.11-mRNA-1 protein Name:"Similar to PSAL Photosystem I reaction center subunit XI, chloroplastic (Spinacia oleracea)" AED:0.06 eAED:0.06 QI:217 1 1 1 1 1 2 190 220              | 0.852<br>47 | - 1.576<br>8    |             |                       |                                                                                                                    |
| <b>Xvis03_217230-PA</b> | processed-gene-4.43-mRNA-1 protein Name:"Similar to PREP1 Presequence protease 1, chloroplastic/mitochondrial (Arabidopsis thaliana)" AED:0.19 eAED:0.19 QI:1251 0.91 0.84 1 0.75 0.69 13 382 303 | 1.512<br>92 | - 1.447<br>6    | 0.0389<br>4 | IPR036592             | F:GO:0003824;<br>F:GO:0005524;<br>P:GO:0006090;<br>F:GO:0016301;<br>P:GO:0016310;<br>F:GO:0016772;<br>F:GO:0050242 |
| <b>Xvis03_205724-PA</b> | processed-gene-33.32-mRNA-1 protein Name:"Similar to IBI1 Aspartate--tRNA ligase 2, cytoplasmic (Arabidopsis thaliana)" AED:0.10 eAED:0.10 QI:60 0.77 0.8 1 1 1 10 190 552                        | 0.943<br>27 | - 1.558<br>1    | 0.0389<br>5 |                       | P:GO:0006508;<br>F:GO:0008236                                                                                      |
| <b>Xvis03_220977-PA</b> | processed-gene-6.91-mRNA-1 protein Name:"Similar to CYP74B2 Lipoxygenate hydroperoxide lyase, chloroplastic (Arabidopsis thaliana)" AED:0.02 eAED:0.17 QI:0 -1 0 1 -1 1 1 0 486                   | 2.324<br>82 | - 1.253<br>7    | 0.0408<br>6 | IPR002312<br>(PRINTS) | C:GO:0009522;<br>C:GO:0009538;<br>P:GO:0015979                                                                     |

|                         |                                                                                                                                                                                                                                               |             |              |             |                                                                                                                                                                                                                                        |                                                                                                                                     |
|-------------------------|-----------------------------------------------------------------------------------------------------------------------------------------------------------------------------------------------------------------------------------------------|-------------|--------------|-------------|----------------------------------------------------------------------------------------------------------------------------------------------------------------------------------------------------------------------------------------|-------------------------------------------------------------------------------------------------------------------------------------|
| <b>Xvis03_210782-PA</b> | augustus-gene-7.64-mRNA-1 protein<br>Name:"Similar to Os08g0562700 Puro-<br>mycin-sensitive aminopeptidase ( <i>Oryza</i><br><i>sativa</i> subsp. <i>japonica</i> )" AED:0.20<br>eAED:0.20<br>QI:160 0.75 0.81 0.90 0.84 0.84 33 28<br>4 1052 | 5.676<br>78 | - 0.899<br>6 | 0.0411<br>1 | IPR002403<br>(PRINTS);                                                                                                                                                                                                                 | F:GO:0003824;<br>P:GO:0006508;<br>F:GO:0046872                                                                                      |
| <b>Xvis03_219931-PA</b> | processed-gene-8.160-mRNA-1 protein<br>Name:"Similar to SAG12 Senescence-<br>specific cysteine protease SAG12 ( <i>Ara-</i><br><i>bidopsis thaliana</i> )" AED:0.00<br>eAED:0.00<br>QI:0 1 0.5 1 1 1 2 268 331                                | 1.173<br>47 | - 1.471<br>4 | 0.0416<br>5 | IPR024601<br>(PFAM)                                                                                                                                                                                                                    | F:GO:0000166;<br>F:GO:0003676;<br>F:GO:0004812;<br>F:GO:0004815;<br>F:GO:0005524;<br>C:GO:0005737;<br>P:GO:0006418;<br>P:GO:0006422 |
| <b>Xvis03_219642-PA</b> | augustus-gene-3.70-mRNA-1 protein<br>Name:"Similar to Serpin-Z1C ( <i>Triti-</i><br><i>cum aestivum</i> )" AED:0.04 eAED:0.04<br>QI:7 1 1 0.5 0.33 3 183 391                                                                                  | 2.219<br>59 | - 1.134<br>1 | 0.0433<br>5 | IPR00066                                                                                                                                                                                                                               | F:GO:0004497;<br>F:GO:0005506;<br>F:GO:0016705;<br>F:GO:0020037;<br>P:GO:0055114                                                    |
| <b>Xvis03_221434-PA</b> | processed-gene-2.106-mRNA-1 protein<br>Name:"Similar to Beta- galactosidase<br>( <i>Asparagus officinalis</i> )" AED:0.13<br>eAED:0.13 QI:277 1 1 1 1 1 19 418 832                                                                            | 2.435<br>57 | - 1.244<br>5 | 0.0459<br>9 | IPR023796<br>(PFAM)                                                                                                                                                                                                                    | F:GO:0008237;<br>F:GO:0008270                                                                                                       |
| <b>Xvis03_215806-PA</b> | processed-gene-9.114-mRNA-1 pro-<br>tein Name:"Similar to ANN1 An-<br>nexin D1 ( <i>Arabidopsis thaliana</i> )"<br>AED:0.04 eAED:0.04<br>QI:119 1 1 1 1 1 5 186 316                                                                           | 2.396<br>82 | - 1.230<br>1 | 0.0461<br>7 | F:hydrolase ac-<br>tivity, hydrolyz-<br>ing O- glycosyl<br>compounds;<br>P:carbohydrate<br>metabolic pro-<br>cess;<br>F:carbohydrate<br>binding<br>F:calcium ion<br>binding; F:cal-<br>cium- depend-<br>ent<br>phospholipid<br>binding | F:GO:0006508;<br>F:GO:0008234                                                                                                       |

**Table S4:** Upregulated proteins identified in *X. schlechteri* leaf tissue in response to dehydration at different dehydration stages. Early Response to Dehydration (ERD), Mid Response to Dehydration (MRD) and Late Response to Dehydration (LRD). The values represent the level of protein expression observed in each dehydration stage obtained from label-free quantitative proteomics data.

| Protein Name                                                                                   | ERD         | MRD         | LRD         | Dehydration Stage             |
|------------------------------------------------------------------------------------------------|-------------|-------------|-------------|-------------------------------|
| <b>11 kDa late embryogenesis abundant protein (Helianthus annuus)</b>                          | .           | 1.655059944 | 2.557663979 | MRD and LRD                   |
| <b>1-Cys peroxiredoxin (Medicago truncatula)</b>                                               | .           | .           | 1.335126495 | LRD                           |
| <b>29 kDa ribonucleoprotein B, chloroplastic (Nicotiana sylvestris)</b>                        | .           | .           | 0.951861733 | LRD                           |
| <b>AAE3 Oxalate--CoA ligase (Arabidopsis thaliana)</b>                                         | 1.706599422 | 2.36880206  | 2.657314544 | Across all dehydration stages |
| <b>ABP20 Auxin-binding protein ABP20 (Prunus persica)</b>                                      | .           | 0.726395826 | .           | MRD                           |
| <b>AGT1 Serine--glyoxylate aminotransferase (Arabidopsis thaliana)</b>                         | 0.795651548 | .           | .           | ERD                           |
| <b>AKR2 Ankyrin repeat domain-containing protein 2 (Arabidopsis thaliana)</b>                  | .           | .           | 1.77529497  | LRD                           |
| <b>Aldose reductase (Hordeum vulgare)</b>                                                      | .           | 1.943676029 | 2.13724642  | MRD and LRD                   |
| <b>AN3 Naringenin,2-oxoglutarate 3-dioxygenase (Fragment) (Petunia hybrida)</b>                | .           | .           | 1.664133089 | LRD                           |
| <b>At3g10130 Heme-binding-like protein At3g10130, chloroplastic (Arabidopsis thaliana)</b>     | .           | .           | 1.621225267 | LRD                           |
| <b>At4g12130 Putative transferase At4g12130, mitochondrial (Arabidopsis thaliana)</b>          | .           | .           | 1.545694996 | LRD                           |
| <b>At4g13010 Putative quinone-oxidoreductase homolog, chloroplastic (Arabidopsis thaliana)</b> | .           | .           | 2.458639066 | LRD                           |
| <b>At4g22670 FAM10 family protein At4g22670 (Arabidopsis thaliana)</b>                         | .           | .           | 2.096229206 | LRD                           |
| <b>At5g12110 Elongation factor 1-beta 1 (Arabidopsis thaliana)</b>                             | .           | .           | 1.157181359 | LRD                           |
| <b>At5g13200 GEM-like protein 5 (Arabidopsis thaliana)</b>                                     | .           | .           | 2.050192399 | LRD                           |
| <b>At5g39570 Uncharacterized protein At5g39570 (Arabidopsis thaliana)</b>                      | .           | .           | 1.655206338 | LRD                           |
| <b>At5g61250 Heparanase-like protein 2 (Arabidopsis thaliana)</b>                              | 0.954132089 | .           | .           | ERD                           |
| <b>atad1a ATPase family AAA domain-containing protein 1-A (Danio rerio)</b>                    | .           | .           | 1.570578594 | LRD                           |
| <b>B19.4 Late embryogenesis abundant protein B19.4 (Hordeum vulgare)</b>                       | 1.159483161 | 1.816389763 | 2.516909095 | Across all dehydration stages |

|                                                                                                     |             |             |             |                               |
|-----------------------------------------------------------------------------------------------------|-------------|-------------|-------------|-------------------------------|
| Blue copper protein ( <i>Pisum sativum</i> )                                                        | .           | 1.604443074 | .           | MRD                           |
| Bowman-Birk type trypsin inhibitor ( <i>Triticum aestivum</i> )                                     | 1.490311914 | .           | 2.18560715  | ERD and LRD                   |
| CAISE5 Glucose and ribitol dehydrogenase ( <i>Daucus carota</i> )                                   | .           | .           | 1.170057472 | LRD                           |
| CAL1 Calmodulin ( <i>Medicago sativa</i> )                                                          | 1.635472647 | .           | .           | ERD                           |
| Carbonic anhydrase, chloroplastic ( <i>Hordeum vulgare</i> )                                        | .           | .           | 1.063629616 | LRD                           |
| CCR1 Cinnamoyl-CoA reductase 1 ( <i>Arabidopsis thaliana</i> )                                      | 1.561330267 | 1.623791745 | 2.600421553 | Across all dehydration stages |
| CCT2 Choline-phosphate cytidyltransferase 2 ( <i>Arabidopsis thaliana</i> )                         | .           | 1.891082235 | 2.434010574 | MRD and LRD                   |
| CHLD Magnesium-chelatase subunit ChLD, chloroplastic ( <i>Oryza sativa</i> subsp. <i>japonica</i> ) | .           | .           | 2.199000455 | LRD                           |
| CHLI Magnesium-chelatase subunit ChLI, chloroplastic ( <i>Oryza sativa</i> subsp. <i>japonica</i> ) | .           | .           | 2.663002746 | LRD                           |
| CLPB3 Chaperone protein ClpB3, chloroplastic ( <i>Arabidopsis thaliana</i> )                        | .           | .           | 1.718787179 | LRD                           |
| CML18 Probable calcium-binding protein CML18 ( <i>Oryza sativa</i> subsp. <i>japonica</i> )         | .           | 1.972359689 | 2.643203935 | MRD and LRD                   |
| COR47 Dehydrin COR47 ( <i>Arabidopsis thaliana</i> )                                                | .           | .           | 1.720897276 | LRD                           |
| CSD2 Superoxide dismutase [Cu-Zn] 2, chloroplastic ( <i>Arabidopsis thaliana</i> )                  | .           | .           | 0.770670729 | LRD                           |
| CSP1 Cold shock protein 1 ( <i>Arabidopsis thaliana</i> )                                           | .           | 1.625479205 | 2.163496526 | MRD and LRD                   |
| CSP4 Cold shock domain-containing protein 4 ( <i>Arabidopsis thaliana</i> )                         | .           | .           | 1.282197447 | LRD                           |
| CYP74A2 Allene oxide synthase 2 ( <i>Oryza sativa</i> subsp. <i>japonica</i> )                      | 0.859536898 | .           | .           | ERD                           |
| CYS6 Cysteine proteinase inhibitor 6 ( <i>Arabidopsis thaliana</i> )                                | .           | .           | 1.091432261 | LRD                           |
| Desiccation-related protein PCC13-62 ( <i>Craterostigma plantagineum</i> )                          | .           | 1.325612786 | 1.66968991  | MRD and LRD                   |
| Desiccation-related protein PCC3-06 ( <i>Craterostigma plantagineum</i> )                           | 1.709026897 | 2.741681551 | 3.802948804 | Across all dehydration stages |
| DHN1 Dehydrin DHN1 ( <i>Hordeum vulgare</i> )                                                       | .           | .           | 2.239287919 | LRD                           |
| DHN3 Dehydrin DHN3 ( <i>Hordeum vulgare</i> )                                                       | .           | 1.134434404 | 1.889777148 | MRD and LRD                   |
| ECU03_1610 Uncharacterized protein ECU03_1610 ( <i>Encephalitozoon cuniculi</i> (strain GB-M1))     | .           | .           | 3.039136047 | LRD                           |
| EIF-5A2 Eukaryotic translation initiation factor 5A-2 ( <i>Nicotiana glauca</i> )                   | .           | .           | 2.095729012 | LRD                           |

|                                                                                                            |             |             |             |                               |
|------------------------------------------------------------------------------------------------------------|-------------|-------------|-------------|-------------------------------|
| Embryonic protein DC-8 ( <i>Daucus carota</i> )                                                            | .           | 1.456424806 | 2.545812228 | MRD and LRD                   |
| ERF1-3 Eukaryotic peptide chain release factor subunit 1-3 ( <i>Arabidopsis thaliana</i> )                 | .           | 1.543122406 | 2.677097134 | MRD and LRD                   |
| Eukaryotic translation initiation factor 5A ( <i>Manihot esculenta</i> )                                   | .           | .           | 1.934951423 | LRD                           |
| FEN1 Flap endonuclease 1 ( <i>Zea mays</i> )                                                               | .           | .           | 2.177422956 | LRD                           |
| FLK Flowering locus K homology domain ( <i>Arabidopsis thaliana</i> )                                      | .           | .           | 1.960057559 | LRD                           |
| Fructose-bisphosphate aldolase, cytoplasmic isozyme 1 ( <i>Pisum sativum</i> )                             | .           | .           | 0.979214196 | LRD                           |
| GAPC3 Glyceraldehyde-3-phosphate dehydrogenase 3, cytosolic ( <i>Oryza sativa</i> subsp. <i>japonica</i> ) | .           | 0.869467807 | .           | MRD                           |
| GDCSH Glycine cleavage system H protein, mitochondrial ( <i>Flaveria anomala</i> )                         | .           | .           | 1.545745923 | LRD                           |
| GDCSP Glycine dehydrogenase (decarboxylating), mitochondrial ( <i>Solanum tuberosum</i> )                  | 0.756563035 | .           | .           | ERD                           |
| GDCSPA Glycine dehydrogenase (decarboxylating) A, mitochondrial ( <i>Flaveria pringlei</i> )               | 0.870276947 | .           | .           | ERD                           |
| GLU Ferredoxin-dependent glutamate synthase, chloroplastic ( <i>Oryza sativa</i> subsp. <i>japonica</i> )  | 1.093872984 | .           | .           | ERD                           |
| Glutaredoxin ( <i>Ricinus communis</i> )                                                                   | .           | .           | 1.167181121 | LRD                           |
| GLX2-2 Hydroxyacylglutathione hydrolase cytoplasmic ( <i>Arabidopsis thaliana</i> )                        | .           | .           | 1.66394102  | LRD                           |
| GMPM1 18 kDa seed maturation protein ( <i>Glycine max</i> )                                                | .           | .           | 2.588554158 | LRD                           |
| GSA Glutamate-1-semialdehyde 2,1-aminomutase, chloroplastic ( <i>Oryza sativa</i> subsp. <i>japonica</i> ) | .           | .           | 0.936886678 | LRD                           |
| Histone H4 ( <i>Glycine max</i> )                                                                          | .           | 0.816958339 | .           | MRD                           |
| HOP3 Hsp70-Hsp90 organizing protein 3 ( <i>Arabidopsis thaliana</i> )                                      | .           | .           | 2.004820501 | LRD                           |
| HSP70 Heat shock cognate 70 kDa protein ( <i>Petunia hybrida</i> )                                         | .           | 0.607533066 | .           | MRD                           |
| HSP70 Stromal 70 kDa heat shock-related protein, chloroplastic ( <i>Pisum sativum</i> )                    | .           | .           | 0.554872272 | LRD                           |
| HSP81-1 Heat shock protein 81-1 ( <i>Oryza sativa</i> subsp. <i>japonica</i> )                             | .           | .           | 1.584931903 | LRD                           |
| Hsp83 Heat shock protein 83 ( <i>Drosophila melanogaster</i> )                                             | .           | .           | 1.098741349 | LRD                           |
| HVA22A HVA22-like protein a ( <i>Arabidopsis thaliana</i> )                                                | .           | .           | 1.718206852 | LRD                           |
| Late embryogenesis abundant protein 76 ( <i>Brassica napus</i> )                                           | 1.533858234 | 1.877188535 | 3.861809893 | Across all dehydration stages |

|                                                                                                                                             |            |             |             |                               |
|---------------------------------------------------------------------------------------------------------------------------------------------|------------|-------------|-------------|-------------------------------|
| Late embryogenesis abundant protein D-29 (Gossypium hirsutum)                                                                               | 1.5099243  | 2.576559174 | 2.865984352 | Across all dehydration stages |
| Late embryogenesis abundant protein D-34 (Gossypium hirsutum)                                                                               | 2.07869733 | 1.933306564 | 3.090351727 | Across all dehydration stages |
| Late embryogenesis abundant protein Dc3 (Daucus carota)                                                                                     | .          | .           | 2.624853839 | LRD                           |
| LEA14-A Late embryogenesis abundant protein Lea14-A (Gossypium hirsutum)                                                                    | .          | 1.575799622 | 2.933865689 | MRD and LRD                   |
| LEA3 Late embryogenesis abundant protein, group 3 (Oryza sativa subsp. indica)                                                              | .          | 1.310594012 | 2.660239854 | MRD and LRD                   |
| LTI65 Low-temperature-induced 65 kDa protein (Arabidopsis thaliana)                                                                         | .          | 2.00574943  | 3.1803771   | MRD and LRD                   |
| Major pollen allergen Cor a 1 isoforms 5, 6, 11 and 16 (Corylus avellana)                                                                   | .          | .           | 1.245194023 | LRD                           |
| Mavicyanin (Cucurbita pepo)                                                                                                                 | 1.86719922 | 1.630580037 | .           | ERD and MRD                   |
| MBF1B Multiprotein-bridging factor 1b (Arabidopsis thaliana)                                                                                | .          | .           | 1.867719635 | LRD                           |
| MJ1232 Uncharacterized protein MJ1232 (Methanocaldococcus jannaschii (strain ATCC 43067 / DSM 2661 / JAL-1 / JCM 10045 / NBRC 100440))      | .          | .           | 2.283632713 | LRD                           |
| MORF1 Multiple organellar RNA editing factor 1, mitochondrial (Arabidopsis thaliana)                                                        | .          | .           | 1.72895072  | LRD                           |
| MSRB5 Peptide methionine sulfoxide reductase B5 (Oryza sativa subsp. japonica)                                                              | .          | .           | 2.595009712 | LRD                           |
| MT4A Metallothionein-like protein 4A (Oryza sativa subsp. japonica)                                                                         | .          | .           | 2.380677691 | LRD                           |
| MTA Metallothionein-like protein 1 (Pisum sativum)                                                                                          | .          | .           | 2.140799988 | LRD                           |
| MTH_273 UPF0098 protein MTH_273 (Methanothermobacter thermautotrophicus (strain ATCC 29096 / DSM 1053 / JCM 10044 / NBRC 100330 / Delta H)) | .          | .           | 1.971340074 | LRD                           |
| NFS2 Cysteine desulfurase 1, chloroplastic (Arabidopsis thaliana)                                                                           | .          | .           | 1.588145687 | LRD                           |
| Os01g0253300 Importin subunit alpha-1a (Oryza sativa subsp. japonica)                                                                       | .          | .           | 2.079471181 | LRD                           |
| Os01g0270100 Cysteine proteinase inhibitor 12 (Oryza sativa subsp. japonica)                                                                | .          | .           | 1.291424614 | LRD                           |
| Os02g0194200 Zinc finger CCCH domain-containing protein 14 (Oryza sativa subsp. japonica)                                                   | .          | .           | 1.551029766 | LRD                           |



|                                                                                           |             |             |             |                               |
|-------------------------------------------------------------------------------------------|-------------|-------------|-------------|-------------------------------|
| <b>Os02g0639900 Thioredoxin M1, chloroplastic (Oryza sativa subsp. japonica)</b>          | .           | .           | 1.351875046 | LRD                           |
| <b>PAB8 Polyadenylate-binding protein 8 (Arabidopsis thaliana)</b>                        | .           | .           | 1.246656116 | LRD                           |
| <b>PCKR1 Peptidyl-prolyl cis-trans isomerase (Catharanthus roseus)</b>                    | .           | .           | 1.26642199  | LRD                           |
| <b>PED1 3-ketoacyl-CoA thiolase 2, peroxisomal (Arabidopsis thaliana)</b>                 | .           | .           | 1.71951601  | LRD                           |
| <b>Peptidyl-prolyl cis-trans isomerase (Lupinus luteus)</b>                               | .           | .           | 0.90227811  | LRD                           |
| <b>Phosphoglycerate kinase, chloroplastic (Nicotiana tabacum)</b>                         | .           | .           | 0.426787502 | LRD                           |
| <b>PHS2 Alpha-glucan phosphorylase 2, cytosolic (Arabidopsis thaliana)</b>                | .           | 1.375643724 | .           | MRD                           |
| <b>PLP1 Patatin-like protein 1 (Oryza sativa subsp. japonica)</b>                         | 1.552994529 | 1.416703369 | 1.306470985 | Across all dehydration stages |
| <b>Polyphenol oxidase, chloroplastic (Vitis vinifera)</b>                                 | 0.950857782 | .           | 0.729352191 | ERD and LRD                   |
| <b>PORB Protochlorophyllide reductase B, chloroplastic (Hordeum vulgare)</b>              | .           | .           | 2.112431088 | LRD                           |
| <b>PR1 Pathogenesis-related protein 1 (Asparagus officinalis)</b>                         | .           | .           | 1.178761163 | LRD                           |
| <b>PXG Peroxygenase (Oryza sativa subsp. japonica)</b>                                    | .           | .           | 1.63025003  | LRD                           |
| <b>Pyruvate kinase, cytosolic isozyme (Glycine max)</b>                                   | 0.98750497  | 1.181922208 | .           | ERD and MRD                   |
| <b>RAB18 Dehydrin Rab18 (Arabidopsis thaliana)</b>                                        | .           | 1.435795659 | 2.686911702 | MRD and LRD                   |
| <b>RANBP1C Ran-binding protein 1 homolog c (Arabidopsis thaliana)</b>                     | .           | .           | 1.826681471 | LRD                           |
| <b>RBCS1 Ribulose biphosphate carboxylase small chain, chloroplastic (Musa acuminata)</b> | .           | .           | 0.884589514 | LRD                           |
| <b>Remorin (Solanum tuberosum)</b>                                                        | .           | .           | 1.760610351 | LRD                           |
| <b>RPL23A 60S ribosomal protein L23 (Arabidopsis thaliana)</b>                            | .           | .           | 1.200096286 | LRD                           |
| <b>RPS12 40S ribosomal protein S12 (Hordeum vulgare)</b>                                  | .           | .           | 2.337496384 | LRD                           |
| <b>RPS27B 40S ribosomal protein S27-2 (Arabidopsis thaliana)</b>                          | .           | .           | 1.765478524 | LRD                           |
| <b>RPT1 26S protease regulatory subunit 7 (Prunus persica)</b>                            | .           | .           | 2.275208812 | LRD                           |
| <b>RUB2 Ubiquitin-NEDD8-like protein RUB2 (Oryza sativa subsp. japonica)</b>              | .           | 0.80210109  | .           | MRD                           |
| <b>RuBisCO large subunit-binding protein subunit beta, chloroplastic (Pisum sativum)</b>  | .           | .           | 0.637299581 | LRD                           |

|                                                                                                                            |             |             |             |                               |
|----------------------------------------------------------------------------------------------------------------------------|-------------|-------------|-------------|-------------------------------|
| <b>RZ1B Glycine-rich RNA-binding protein RZ1B (Arabidopsis thaliana)</b>                                                   | .           | .           | 1.838550014 | LRD                           |
| <b>SAPK7 Serine/threonine-protein kinase SAPK7 (Oryza sativa subsp. japonica)</b>                                          | .           | .           | 1.865952133 | LRD                           |
| <b>SBT3.3 Subtilisin-like protease SBT3.3 (Arabidopsis thaliana)</b>                                                       | 0.906750846 | .           | .           | ERD                           |
| <b>SPG20 Spartin (Homo sapiens)</b>                                                                                        | 1.383758686 | 2.136348103 | 3.216160058 | Across all dehydration stages |
| <b>SYNPCC7002_A1590 Uncharacterized protein SYNPCC7002_A1590 (Synechococcus sp. (strain ATCC 27264 / PCC 7002 / PR-6))</b> | .           | 2.038698811 | 3.208950202 | MRD and LRD                   |
| <b>TDX TPR repeat-containing thioredoxin TDX (Arabidopsis thaliana)</b>                                                    | .           | .           | 1.272280451 | LRD                           |
| <b>TMEM205 Transmembrane protein 205 (Homo sapiens)</b>                                                                    | 2.770021473 | 2.67668267  | 4.380864231 | Across all dehydration stages |
| <b>TSJT1 Stem-specific protein TSJT1 (Nicotiana tabacum)</b>                                                               | .           | .           | 1.611606585 | LRD                           |
| <b>TUFB1 Elongation factor Tu, chloroplastic (Glycine max)</b>                                                             | .           | .           | 0.984597415 | LRD                           |
| <b>UGPA UTP--glucose-1-phosphate uridylyltransferase (Musa acuminata)</b>                                                  | .           | 0.654674746 | .           | MRD                           |
| <b>UGT78D2 UDP-glycosyltransferase 78D2 (Arabidopsis thaliana)</b>                                                         | 1.920989868 | 2.561905006 | 2.78513244  | Across all dehydration stages |
| <b>v1g171563 Eukaryotic translation initiation factor 3 subunit G (Nematostella vectensis)</b>                             | .           | .           | 1.37568463  | LRD                           |

**Table S5:** Down-regulated proteins identified in *X. schlechteri* leaf tissue in response to dehydration at different dehydration stages. Early Response to Dehydration (ERD), Mid Response to Dehydration (MRD) and Late Response to Dehydration (LRD). The values represent the level of protein expression observed in each dehydration stage obtained from label-free quantitative proteomics data.

| Protein Name                                                                                                    | ERD      | MRD      | LRD      | Dehydration stage             |
|-----------------------------------------------------------------------------------------------------------------|----------|----------|----------|-------------------------------|
| 14-3-3-like protein ( <i>Pisum sativum</i> )                                                                    |          | -1.10726 |          | MRD                           |
| ACO2 Aconitate hydratase 2, mitochondrial ( <i>Arabidopsis thaliana</i> )                                       |          |          | -1.25587 | LRD                           |
| ADG2 Glucose-1-phosphate adenylyltransferase large subunit 1, chloroplastic ( <i>Arabidopsis thaliana</i> )     |          | -1.17966 | -1.16885 | MRD and LRD                   |
| ADK-B Adenylate kinase 4 ( <i>Oryza sativa</i> subsp. <i>japonica</i> )                                         | -1.44179 | -1.37469 |          | ERD and MRD                   |
| AFRR Monodehydroascorbate reductase ( <i>Solanum lycopersicum</i> )                                             |          |          | -1.00416 | LRD                           |
| AGD2 Probable LL-diaminopimelate aminotransferase, chloroplastic ( <i>Oryza sativa</i> subsp. <i>japonica</i> ) |          |          | -1.77126 | LRD                           |
| ALATS Alanine--tRNA ligase ( <i>Arabidopsis thaliana</i> )                                                      |          |          | -1.49467 | LRD                           |
| Alpha-galactosidase ( <i>Coffea arabica</i> )                                                                   | -1.07142 | -1.17216 | -1.0592  | Across all dehydration stages |
| Alpha-mannosidase ( <i>Canavalia ensiformis</i> )                                                               |          | -1.36506 | -1.27805 | MRD and LRD                   |
| ANN1 Annexin D1 ( <i>Arabidopsis thaliana</i> )                                                                 |          | -1.51742 | -1.23012 | MRD and LRD                   |
| APX1 L-ascorbate peroxidase, cytosolic ( <i>Pisum sativum</i> )                                                 |          | -2.01611 | -3.26533 | MRD and LRD                   |
| APX4 Probable L-ascorbate peroxidase 4 ( <i>Oryza sativa</i> subsp. <i>japonica</i> )                           |          | -1.42542 |          | MRD                           |
| APXT L-ascorbate peroxidase T, chloroplastic ( <i>Arabidopsis thaliana</i> )                                    |          | -2.14943 |          | MRD                           |
| At1g09760 U2 small nuclear ribonucleoprotein A' ( <i>Arabidopsis thaliana</i> )                                 |          | -1.75195 |          | MRD                           |
| At1g62810 Primary amine oxidase ( <i>Arabidopsis thaliana</i> )                                                 |          |          | -2.47528 | LRD                           |
| At1g67280 Probable lactoylglutathione lyase, chloroplast ( <i>Arabidopsis thaliana</i> )                        |          | -1.59699 |          | MRD                           |
| At2g04400 Indole-3-glycerol phosphate synthase, chloroplastic ( <i>Arabidopsis thaliana</i> )                   |          | -1.87518 |          | MRD                           |
| At2g21870 Probable ATP synthase 24 kDa subunit, mitochondrial ( <i>Arabidopsis thaliana</i> )                   |          | -0.93448 |          | MRD                           |
| At3g10130 Heme-binding-like protein At3g10130, chloroplastic ( <i>Arabidopsis thaliana</i> )                    |          | -1.84486 |          | MRD                           |

|                                                                                                                                                              |          |          |          |                               |
|--------------------------------------------------------------------------------------------------------------------------------------------------------------|----------|----------|----------|-------------------------------|
| At3g48420 Haloacid dehalogenase-like hydrolase domain-containing protein At3g48420 ( <i>Arabidopsis thaliana</i> )                                           |          | -1.65737 |          | MRD                           |
| At3g63540 Thylakoid lumenal 19 kDa protein, chloroplastic ( <i>Arabidopsis thaliana</i> )                                                                    |          | -1.21618 |          | MRD                           |
| At4g13360 3-hydroxyisobutyryl-CoA hydrolase-like protein 3, mitochondrial ( <i>Arabidopsis thaliana</i> )                                                    |          |          | -1.4925  | LRD                           |
| At4g26910 Dihydrolipoyllysine-residue succinyltransferase component of 2-oxoglutarate dehydrogenase complex 2, mitochondrial ( <i>Arabidopsis thaliana</i> ) | -0.89439 | -1.00452 |          | ERD and MRD                   |
| ATP synthase subunit delta', mitochondrial ( <i>Ipomoea batatas</i> )                                                                                        |          | -1.85971 |          | MRD                           |
| Basic secretory protease (Fragments) ( <i>Boswellia serrata</i> )                                                                                            | -1.6699  | -1.48199 | -2.38693 | Across all dehydration stages |
| Beta-galactosidase ( <i>Asparagus officinalis</i> )                                                                                                          |          | -1.86712 | -1.24451 | MRD and LRD                   |
| BGAL9 Beta-galactosidase 9 ( <i>Arabidopsis thaliana</i> )                                                                                                   |          | -1.1721  |          | MRD                           |
| BGLU22 Beta-glucosidase 22 ( <i>Oryza sativa</i> subsp. <i>japonica</i> )                                                                                    |          |          | -1.47715 | LRD                           |
| caa43 2-haloacrylate reductase ( <i>Burkholderia</i> sp.)                                                                                                    |          |          | -1.66697 | LRD                           |
| CAB13 Chlorophyll a-b binding protein 13, chloroplastic ( <i>Solanum lycopersicum</i> )                                                                      |          | -1.98118 | -3.54613 | MRD and LRD                   |
| CAB21 Chlorophyll a-b binding protein 21, chloroplastic ( <i>Nicotiana tabacum</i> )                                                                         |          | -1.51935 | -2.68394 | MRD and LRD                   |
| CAB36 Chlorophyll a-b binding protein 36, chloroplastic ( <i>Nicotiana tabacum</i> )                                                                         |          | -1.0662  | -2.82067 | MRD and LRD                   |
| CAB6A Chlorophyll a-b binding protein 6A, chloroplastic ( <i>Solanum lycopersicum</i> )                                                                      |          | -1.04674 | -3.1886  | MRD and LRD                   |
| CAB7 Chlorophyll a-b binding protein 7, chloroplastic ( <i>Solanum lycopersicum</i> )                                                                        |          |          | -1.71514 | LRD                           |
| CAB8 Chlorophyll a-b binding protein 8, chloroplastic ( <i>Solanum lycopersicum</i> )                                                                        |          |          | -2.88429 | LRD                           |
| CAP10A Chlorophyll a-b binding protein CP24 10A, chloroplastic ( <i>Solanum lycopersicum</i> )                                                               |          | -1.68796 | -1.89943 | MRD and LRD                   |
| CAT1 Catalase-1 ( <i>Triticum aestivum</i> )                                                                                                                 |          | -0.86209 |          | MRD                           |
| CEBIP Chitin elicitor-binding protein ( <i>Oryza sativa</i> subsp. <i>japonica</i> )                                                                         |          |          | -1.27643 | LRD                           |
| CEST Protein CHLOROPLAST ENHANCING STRESS TOLERANCE, chloroplastic ( <i>Oryza sativa</i> subsp. <i>japonica</i> )                                            |          | -1.61931 |          | MRD                           |
| CHI4 Endochitinase PR4 ( <i>Phaseolus vulgaris</i> )                                                                                                         | -1.70233 |          | -1.95186 | ERD and LRD                   |

|                                                                                                       |          |          |          |                               |
|-------------------------------------------------------------------------------------------------------|----------|----------|----------|-------------------------------|
| <b>CHLM Magnesium protoporphyrin IX methyltransferase, chloroplastic (Arabidopsis thaliana)</b>       | -1.54851 |          |          | ERD                           |
| <b>Chlorophyll a-b binding protein, chloroplastic (Spinacia oleracea)</b>                             |          | -1.59118 | -2.75709 | MRD and LRD                   |
| <b>CHLP Geranylgeranyl diphosphate reductase, chloroplastic (Nicotiana tabacum)</b>                   | -1.54227 | -1.87164 | -1.88202 | Across all dehydration stages |
| <b>CLPP5 ATP-dependent Clp protease proteolytic subunit 5, chloroplastic (Arabidopsis thaliana)</b>   |          | -1.52476 |          | MRD                           |
| <b>CNX1 Calnexin homolog 1 (Arabidopsis thaliana)</b>                                                 |          | -1.57911 |          | MRD                           |
| <b>CPN21 20 kDa chaperonin, chloroplastic (Arabidopsis thaliana)</b>                                  |          | -1.30291 |          | MRD                           |
| <b>CSP41A Chloroplast stem-loop binding protein of 41 kDa a, chloroplastic (Arabidopsis thaliana)</b> |          | -1.19802 |          | MRD                           |
| <b>CSP41B Chloroplast stem-loop binding protein of 41 kDa b, chloroplastic (Arabidopsis thaliana)</b> |          | -0.94221 |          | MRD                           |
| <b>CURT1A Protein CURVATURE THYLAKOID 1A, chloroplastic (Arabidopsis thaliana)</b>                    |          | -1.5739  |          | MRD                           |
| <b>CURT1D Protein CURVATURE THYLAKOID 1D, chloroplastic (Arabidopsis thaliana)</b>                    |          | -1.78231 |          | MRD                           |
| <b>CYCL Cytochrome c1-1, heme protein, mitochondrial (Solanum tuberosum)</b>                          |          | -1.69274 |          | MRD                           |
| <b>CYP37 Peptidyl-prolyl cis-trans isomerase CYP37, chloroplastic (Arabidopsis thaliana)</b>          |          | -1.5542  |          | MRD                           |
| <b>CYP74B2 Linolenate hydroperoxide lyase, chloroplastic (Arabidopsis thaliana)</b>                   |          |          | -1.25374 | LRD                           |
| <b>dapb3 Dipeptidyl aminopeptidase BIII (Pseudoxanthomonas mexicana)</b>                              |          |          | -1.62806 | LRD                           |
| <b>EBM Mannosylglycoprotein endo-beta-mannosidase (Lilium longiflorum)</b>                            |          |          | -1.06139 | LRD                           |
| <b>EDA2 Probable serine protease EDA2 (Arabidopsis thaliana)</b>                                      |          |          | -1.40294 | LRD                           |
| <b>Ephx2 Bifunctional epoxide hydrolase 2 (Mus musculus)</b>                                          |          | -1.62283 |          | MRD                           |
| <b>FBPban1 Fructose-1,6-bisphosphatase, cytosolic (Musa acuminata)</b>                                |          | -1.55921 |          | MRD                           |
| <b>FKBP19 Peptidyl-prolyl cis-trans isomerase FKBP19, chloroplastic (Arabidopsis thaliana)</b>        |          | -1.65151 |          | MRD                           |
| <b>FKBP62 Peptidyl-prolyl cis-trans isomerase FKBP62 (Arabidopsis thaliana)</b>                       |          | -1.4288  |          | MRD                           |

|                                                                                                                   |          |          |          |             |
|-------------------------------------------------------------------------------------------------------------------|----------|----------|----------|-------------|
| <b>GAPC2</b> Glyceraldehyde-3-phosphate dehydrogenase 2, cytosolic ( <i>Oryza sativa</i> subsp. <i>japonica</i> ) | -0.73304 |          |          | ERD         |
| <b>GGAT1</b> Glutamate--glyoxylate aminotransferase 1 ( <i>Arabidopsis thaliana</i> )                             |          | -2.4394  |          | MRD         |
| <b>GGH2</b> Gamma-glutamyl hydrolase 2 ( <i>Arabidopsis thaliana</i> )                                            |          | -1.31007 |          | MRD         |
| <b>GLU</b> Ferredoxin-dependent glutamate synthase, chloroplastic ( <i>Oryza sativa</i> subsp. <i>japonica</i> )  |          |          | -1.80357 | LRD         |
| <b>Glucan</b> endo-1,3-beta-glucosidase, acidic isoform ( <i>Zea mays</i> )                                       | -2.188   |          |          | ERD         |
| <b>GOR</b> Glutathione reductase, chloroplastic (Fragment) ( <i>Nicotiana tabacum</i> )                           |          |          | -1.21042 | LRD         |
| <b>HEMC</b> Porphobilinogen deaminase, chloroplastic ( <i>Oryza sativa</i> subsp. <i>japonica</i> )               | -1.08601 | -1.46669 |          | ERD and MRD |
| <b>HIR1</b> Hypersensitive-induced response protein 1 ( <i>Arabidopsis thaliana</i> )                             |          | -1.87411 |          | MRD         |
| <b>HIR1</b> Hypersensitive-induced response protein 1 ( <i>Arabidopsis thaliana</i> )                             |          |          | -1.80702 | LRD         |
| <b>HSP90</b> Endoplasmic homolog ( <i>Catharanthus roseus</i> )                                                   | -1.16691 |          |          | ERD         |
| <b>IBI1</b> Aspartate--tRNA ligase 2, cytoplasmic ( <i>Arabidopsis thaliana</i> )                                 |          |          | -1.55808 | LRD         |
| <b>IMPL1</b> Phosphatase IMPL1, chloroplastic ( <i>Arabidopsis thaliana</i> )                                     |          | -1.75618 |          | MRD         |
| <b>infC</b> Translation initiation factor IF-3 ( <i>Nostoc</i> sp. (strain PCC 7120 / UTEX 2576))                 |          | -1.50504 |          | MRD         |
| <b>LHCA1</b> Chlorophyll a-b binding protein 6, chloroplastic ( <i>Arabidopsis thaliana</i> )                     |          | -1.35192 | -2.65519 | MRD and LRD |
| <b>LHCA4</b> Chlorophyll a-b binding protein 4, chloroplastic ( <i>Arabidopsis thaliana</i> )                     |          | -1.45625 | -2.63069 | MRD and LRD |
| <b>LHCB4.2</b> Chlorophyll a-b binding protein CP29.2, chloroplastic ( <i>Arabidopsis thaliana</i> )              |          | -1.00218 | -3.71008 | MRD and LRD |
| <b>LHCB5</b> Chlorophyll a-b binding protein CP26, chloroplastic ( <i>Arabidopsis thaliana</i> )                  |          | -1.46518 | -3.18151 | MRD and LRD |
| <b>ligA</b> DNA ligase ( <i>Bradyrhizobium</i> sp. (strain ORS278))                                               |          |          | -1.86947 | LRD         |
| <b>LOX2.1</b> Linoleate 13S-lipoxygenase 2-1, chloroplastic ( <i>Solanum tuberosum</i> )                          |          |          | -2.25474 | LRD         |
| <b>LSF1</b> Phosphoglucan phosphatase LSF1, chloroplastic ( <i>Arabidopsis thaliana</i> )                         |          | -1.30958 |          | MRD         |
| <b>NAD-ME1</b> NAD-dependent malic enzyme 1, mitochondrial ( <i>Arabidopsis thaliana</i> )                        |          | -1.668   | -1.65009 | MRD and LRD |
| <b>OEP21B</b> Outer envelope pore protein 21B, chloroplastic ( <i>Arabidopsis thaliana</i> )                      |          |          | -1.43681 | LRD         |

|                                                                                                                        |          |          |          |                               |
|------------------------------------------------------------------------------------------------------------------------|----------|----------|----------|-------------------------------|
| Os01g0895100 Probable membrane-associated 30 kDa protein, chloroplastic ( <i>Oryza sativa</i> subsp. japonica)         |          | -1.44434 |          | MRD                           |
| Os02g0739600 Pyruvate dehydrogenase E1 component subunit alpha-1, mitochondrial ( <i>Oryza sativa</i> subsp. japonica) |          |          | -1.4089  | LRD                           |
| Os06g0675700 Probable alpha-glucosidase Os06g0675700 ( <i>Oryza sativa</i> subsp. japonica)                            | -1.26142 | -1.86095 | -1.70842 | Across all dehydration stages |
| Os08g0242700 ACT domain-containing protein DS12, chloroplastic ( <i>Oryza sativa</i> subsp. japonica)                  |          | -1.61348 |          | MRD                           |
| Os08g0288200 Probable adenylate kinase 5, chloroplastic ( <i>Oryza sativa</i> subsp. japonica)                         | -1.53706 | -1.61952 | -1.57662 | Across all dehydration stages |
| Os08g0562700 Puromycin-sensitive aminopeptidase ( <i>Oryza sativa</i> subsp. japonica)                                 |          |          | -0.89965 | LRD                           |
| Os09g0529100 Probable 6-phosphogluconolactonase 4, chloroplastic ( <i>Oryza sativa</i> subsp. japonica)                | -1.90522 |          |          | ERD                           |
| PAB1 Proteasome subunit alpha type-2 ( <i>Oryza sativa</i> subsp. japonica)                                            |          | -1.36335 |          | MRD                           |
| PAP2 Probable inactive purple acid phosphatase 2 ( <i>Arabidopsis thaliana</i> )                                       |          |          | -1.20063 | LRD                           |
| PAP27 Probable inactive purple acid phosphatase 27 ( <i>Arabidopsis thaliana</i> )                                     |          | -1.5832  |          | MRD                           |
| PAP27 Probable inactive purple acid phosphatase 27 ( <i>Arabidopsis thaliana</i> )                                     |          |          | -2.07959 | LRD                           |
| PBF1 Proteasome subunit beta type-1 ( <i>Oryza sativa</i> subsp. japonica)                                             |          |          | -1.19524 | LRD                           |
| PBG1 Proteasome subunit beta type-4 ( <i>Arabidopsis thaliana</i> )                                                    |          | -1.36101 |          | MRD                           |
| Peptide-N4-(N-acetyl-beta-glucosaminyl)asparagine amidase A ( <i>Prunus dulcis</i> )                                   |          | -1.5359  | -1.48744 | MRD and LRD                   |
| petC Cytochrome b6-f complex iron-sulfur subunit, chloroplastic ( <i>Oryza sativa</i> subsp. japonica)                 | -1.19338 | -1.35424 |          | ERD and MRD                   |
| PETE Plastocyanin minor isoform, chloroplastic ( <i>Arabidopsis thaliana</i> )                                         |          | -1.26885 |          | MRD                           |
| PETH Ferredoxin--NADP reductase, leaf isozyme, chloroplastic ( <i>Pisum sativum</i> )                                  |          | -0.9405  |          | MRD                           |
| PGMP Phosphoglucomutase, chloroplastic ( <i>Solanum tuberosum</i> )                                                    |          | -1.38242 |          | MRD                           |

|                                                                                                     |          |          |          |             |
|-----------------------------------------------------------------------------------------------------|----------|----------|----------|-------------|
| <b>PME35 Probable pectinesterase/pectinesterase inhibitor 35 (Arabidopsis thaliana)</b>             |          |          | -1.40972 | LRD         |
| <b>PNSL1 Photosynthetic NDH subunit of lumenal location 1, chloroplastic (Arabidopsis thaliana)</b> | -1.62881 | -2.05822 |          | ERD and MRD |
| <b>POPTRDRAFT_831870 Biotin carboxylase 1, chloroplastic (Populus trichocarpa)</b>                  |          |          | -1.77974 | LRD         |
| <b>PORB Protochlorophyllide reductase B, chloroplastic (Hordeum vulgare)</b>                        | -1.80876 |          |          | ERD         |
| <b>PPL1 PsbP-like protein 1, chloroplastic (Arabidopsis thaliana)</b>                               |          | -1.11766 |          | MRD         |
| <b>PREP1 Presequence protease 1, chloroplastic/mitochondrial (Arabidopsis thaliana)</b>             |          |          | -1.44761 | LRD         |
| <b>Proteasome subunit beta type-5 (Spinacia oleracea)</b>                                           |          |          | -1.27071 | LRD         |
| <b>psaD Photosystem I reaction center subunit II, chloroplastic (Cucumis sativus)</b>               |          |          | -1.3584  | LRD         |
| <b>PSAD2 Photosystem I reaction center subunit II-2, chloroplastic (Arabidopsis thaliana)</b>       |          |          | -1.28325 | LRD         |
| <b>PSAF Photosystem I reaction center subunit III, chloroplastic (Arabidopsis thaliana)</b>         |          |          | -1.32661 | LRD         |
| <b>PSAG Photosystem I reaction center subunit V, chloroplastic (Arabidopsis thaliana)</b>           |          |          | -2.25576 | LRD         |
| <b>PSAH1 Photosystem I reaction center subunit VI-1, chloroplastic (Arabidopsis thaliana)</b>       |          | -1.55564 |          | MRD         |
| <b>PSAH1 Photosystem I reaction center subunit VI-1, chloroplastic (Arabidopsis thaliana)</b>       |          |          | -2.7504  | LRD         |
| <b>PSAH2 Photosystem I reaction center subunit VI-2, chloroplastic (Arabidopsis thaliana)</b>       |          |          | -2.32278 | LRD         |
| <b>PSAL Photosystem I reaction center subunit XI, chloroplastic (Hordeum vulgare)</b>               |          |          | -2.04454 | LRD         |
| <b>PSAN Photosystem I reaction center subunit N, chloroplastic (Arabidopsis thaliana)</b>           |          |          | -2.69906 | LRD         |
| <b>PSBO Oxygen-evolving enhancer protein 1, chloroplastic (Solanum lycopersicum)</b>                |          | -1.27835 | -1.09965 | MRD and LRD |
| <b>PSBP Oxygen-evolving enhancer protein 2, chloroplastic (Pisum sativum)</b>                       |          | -1.3232  |          | MRD         |
| <b>PSBP Oxygen-evolving enhancer protein 2, chloroplastic (Pisum sativum)</b>                       |          |          | -1.77582 | LRD         |
| <b>PSBR Photosystem II 10 kDa polypeptide, chloroplastic (Solanum tuberosum)</b>                    |          |          | -2.69774 | LRD         |
| <b>PXG4 Probable peroxygenase 4 (Arabidopsis thaliana)</b>                                          |          | -1.81513 |          | MRD         |



|                                                                                                                 |          |          |          |                               |
|-----------------------------------------------------------------------------------------------------------------|----------|----------|----------|-------------------------------|
| <b>RABA2A</b> Ras-related protein RABA2a ( <i>Arabidopsis thaliana</i> )                                        | -1.62736 | -1.61228 | -1.45266 | Across all dehydration stages |
| <b>RBCS1</b> Ribulose biphosphate carboxylase small chain, chloroplastic ( <i>Musa acuminata</i> )              |          | -0.84364 |          | MRD                           |
| <b>RCA1</b> Ribulose biphosphate carboxylase/oxygenase activase 1, chloroplastic ( <i>Larrea tridentata</i> )   |          | -0.90161 |          | MRD                           |
| <b>RCA2</b> Ribulose biphosphate carboxylase/oxygenase activase 2, chloroplastic ( <i>Larrea tridentata</i> )   |          | -1.41565 |          | MRD                           |
| <b>Remorin</b> ( <i>Solanum tuberosum</i> )                                                                     |          | -1.21839 |          | MRD                           |
| <b>RFS</b> Galactinol--sucrose galactosyltransferase ( <i>Oryza sativa</i> subsp. <i>japonica</i> )             | -1.69881 | -2.55586 | -2.80097 | Across all dehydration stages |
| <b>RPL3</b> 60S ribosomal protein L3 ( <i>Oryza sativa</i> subsp. <i>japonica</i> )                             |          | -1.41616 |          | MRD                           |
| <b>RPL4</b> 50S ribosomal protein L4, chloroplastic ( <i>Nicotiana tabacum</i> )                                |          | -1.75638 |          | MRD                           |
| <b>RPL5</b> 50S ribosomal protein L5, chloroplastic ( <i>Arabidopsis thaliana</i> )                             | -0.93784 | -1.84237 |          | ERD and MRD                   |
| <b>RPL8</b> 60S ribosomal protein L8 ( <i>Solanum lycopersicum</i> )                                            |          | -1.48883 |          | MRD                           |
| <b>RPL9</b> 50S ribosomal protein L9, chloroplastic ( <i>Arabidopsis thaliana</i> )                             |          | -1.55571 |          | MRD                           |
| <b>RPN8A</b> 26S proteasome non-ATPase regulatory subunit 7 homolog A ( <i>Arabidopsis thaliana</i> )           | -1.47507 |          |          | ERD                           |
| <b>RPS17</b> 40S ribosomal protein S17 ( <i>Solanum lycopersicum</i> )                                          |          | -2.25057 |          | MRD                           |
| <b>RPS2C</b> 40S ribosomal protein S2-3 ( <i>Arabidopsis thaliana</i> )                                         |          | -1.16438 |          | MRD                           |
| <b>rps5</b> 30S ribosomal protein S5, chloroplastic ( <i>Arabidopsis thaliana</i> )                             |          | -1.46291 |          | MRD                           |
| <b>SAG12</b> Senescence-specific cysteine protease SAG12 ( <i>Arabidopsis thaliana</i> )                        |          |          | -1.47142 | LRD                           |
| <b>Serine hydroxymethyltransferase</b> , mitochondrial ( <i>Solanum tuberosum</i> )                             |          | -0.61287 |          | MRD                           |
| <b>Serpin-Z1C</b> ( <i>Triticum aestivum</i> )                                                                  |          |          | -1.13413 | LRD                           |
| <b>SPAC9E9.15</b> Uncharacterized protein C9E9.15 ( <i>Schizosaccharomyces pombe</i> (strain 972 / ATCC 24843)) |          | -1.10348 | -1.52577 | MRD and LRD                   |
| <b>tal</b> Transaldolase ( <i>Shewanella loihica</i> (strain ATCC BAA-1088 / PV-4))                             | -1.73548 |          |          | ERD                           |

|                                                                                                                                              |          |          |          |                               |
|----------------------------------------------------------------------------------------------------------------------------------------------|----------|----------|----------|-------------------------------|
| <b>TCTP</b> Translationally-controlled tumor protein homolog ( <i>Elaeis guineensis</i> var. <i>tenera</i> )                                 | -1.25771 | -1.59903 |          | ERD and MRD                   |
| <b>THI1-2</b> Thiamine thiazole synthase 2, chloroplastic ( <i>Vitis vinifera</i> )                                                          |          |          | -1.21078 | LRD                           |
| <b>TIC62</b> Protein TIC 62, chloroplastic ( <i>Arabidopsis thaliana</i> )                                                                   |          | -1.77576 |          | MRD                           |
| <b>tolB</b> Protein TolB ( <i>Geobacter metallireducens</i> (strain GS-15 / ATCC 53774 / DSM 7210))                                          |          | -1.63042 | -1.53492 | MRD and LRD                   |
| <b>TP53I3</b> Quinone oxidoreductase <b>PIG3</b> ( <i>Homo sapiens</i> )                                                                     | -1.5504  |          | -1.55183 | ERD and LRD                   |
| <b>TPIP1</b> Triosephosphate isomerase, chloroplastic ( <i>Spinacia oleracea</i> )                                                           |          | -1.13924 |          | MRD                           |
| <b>Transketolase</b> , chloroplastic ( <i>Solanum tuberosum</i> )                                                                            |          | -1.00238 | -1.01196 | MRD and LRD                   |
| <b>Triosephosphate isomerase</b> , chloroplastic ( <i>Secale cereale</i> )                                                                   |          | -1.54031 |          | MRD                           |
| <b>UAM1</b> UDP-arabinopyranose mutase 1 ( <i>Oryza sativa</i> subsp. <i>japonica</i> )                                                      |          |          | -1.79507 | LRD                           |
| <b>UVR8</b> Ultraviolet-B receptor <b>UVR8</b> ( <i>Arabidopsis thaliana</i> )                                                               | -1.56712 | -1.77932 | -1.63009 | Across all dehydration stages |
| <b>Vacuolar-processing enzyme</b> ( <i>Citrus sinensis</i> )                                                                                 | -1.48109 | -1.87333 | -2.42145 | Across all dehydration stages |
| <b>VIT_19s0014g02480</b> Probable bifunctional methylthioribulose-1-phosphate dehydratase/enolase-phosphatase E1 1 ( <i>Vitis vinifera</i> ) |          | -1.45087 | -1.39129 | MRD and LRD                   |
| <b>WAXY</b> Granule-bound starch synthase 1, chloroplastic/amyloplastic ( <i>Antirrhinum majus</i> )                                         |          |          | -1.8444  | LRD                           |
| <b>zta1</b> Probable quinone oxidoreductase ( <i>Schizosaccharomyces pombe</i> (strain 972 / ATCC 24843))                                    |          |          | -1.81277 | LRD                           |
| <b>Keratin, type I cytoskeletal 9 - Homo sapiens (Human).</b>                                                                                | -1.58735 |          | -2.07128 | ERD and LRD                   |
| <b>Protein of unknown function</b>                                                                                                           | -1.86452 |          |          | ERD                           |
| <b>Protein of unknown function</b>                                                                                                           | -1.59024 |          |          | ERD                           |
| <b>Serum albumin OS=Bos taurus GN=ALB PE=1 SV=4</b>                                                                                          | -2.02522 | -1.78496 | -2.07012 | Across all dehydration stages |

**Table S6:** List of *Xerophyta schlechteri* unknown proteins identified during label-free proteomics. InterPro (<https://www.ebi.ac.uk/interpro/>) was used to find GO-terms and function of the unknown protein where possible.

| <i>X. schlechteri</i><br>ID* | Description                                                                                                                       | GO-Term                                        | Function                                                                                           |
|------------------------------|-----------------------------------------------------------------------------------------------------------------------------------|------------------------------------------------|----------------------------------------------------------------------------------------------------|
| Xvis03_200013-PA             | processed-gene-1.89-mRNA-1 protein<br>Name:"Protein of unknown function"<br>AED:0.15 eAED:0.15 QI:0 -1 0 1 -1 1 1 0 178           | P:GO:0009408;<br>P:GO:0010115                  | P:response to heat;<br>P:regulation of abscisic acid biosynthetic process                          |
| Xvis03_200377-PA             | processed-gene-47.99-mRNA-1 protein<br>Name:"Protein of unknown function"<br>AED:0.68 eAED:0.68 QI:0 -1 0 1 -1 1 1 0 186          | P:GO:0009408;<br>P:GO:0010115                  | P:response to heat;<br>P:regulation of abscisic acid biosynthetic process                          |
| Xvis03_200562-PA             | processed-gene-71.17-mRNA-1 protein<br>Name:"Protein of unknown function"<br>AED:0.29 eAED:0.29<br>QI:199 1 1 1 1 1 5 271 381     | F:GO:0005509                                   | F:calcium ion binding                                                                              |
| Xvis03_202413-PA             | processed-gene-34.23-mRNA-1 protein<br>Name:"Protein of unknown function"<br>AED:0.01 eAED:0.01 QI:0 -1 0 1 -1 1 1 0 140          | C:GO:0005783;<br>P:GO:0006886;<br>C:GO:0016021 | C:endoplasmic reticulum;<br>P:intracellular protein transport;<br>C:integral component of membrane |
| Xvis03_204624-PA             | augustus-gene-37.61-mRNA-1 protein<br>Name:"Protein of unknown function"<br>AED:0.00 eAED:0.00<br>QI:188 1 1 1 1 1 5 376 359      | F:GO:0003723                                   | F:RNA binding                                                                                      |
| Xvis03_205607-PA             | augustus-gene-18.67-mRNA-1 protein<br>Name:"Protein of unknown function"<br>AED:0.34 eAED:0.34<br>QI:138 1 1 1 1 1 4 447 216      | P:GO:0000724;<br>F:GO:0003677                  | P:double-strand break repair via homologous recombination;<br>F:DNA binding                        |
| Xvis03_206711-PA             | augustus-gene-20.17-mRNA-1 protein<br>Name:"Protein of unknown function"<br>AED:0.00 eAED:0.00<br>QI:112 1 1 1 1 1 2 153 186      | F:GO:0005515                                   | F:protein binding                                                                                  |
| Xvis03_206781-PA             | processed-gene-26.3-mRNA-1 protein<br>Name:"Protein of unknown function"<br>AED:0.19 eAED:0.19<br>QI:331 1 1 1 1 1 2 174 193      | F:GO:0005515                                   | F:protein binding                                                                                  |
| Xvis03_206790-PA             | processed-gene-27.3-mRNA-1 protein<br>Name:"Protein of unknown function"<br>AED:0.52 eAED:0.52<br>QI:0 0.7 0.72 0.72 1 1 11 0 294 | F:GO:0005515                                   | F:protein binding                                                                                  |
| Xvis03_209030-PA             | processed-gene-10.24-mRNA-1 protein<br>Name:"Protein of unknown function"                                                         | F:GO:0003743                                   | F:translation initiation factor activity                                                           |

|                  |                                                                                                                                 |           |                                                                 |                                                                                                                                                                             |
|------------------|---------------------------------------------------------------------------------------------------------------------------------|-----------|-----------------------------------------------------------------|-----------------------------------------------------------------------------------------------------------------------------------------------------------------------------|
|                  | AED:0.25<br>QI:87 0 0.5 0.5 1 1 4 0 556                                                                                         | eAED:0.25 |                                                                 |                                                                                                                                                                             |
| Xvis03_209250-PA | augustus-gene-6.35-mRNA-1 protein<br>Name:"Protein of unknown function"<br>AED:0.09<br>QI:9 1 1 1 0.83 1 7 549 267              | eAED:0.09 | F:GO:0005509;<br>C:GO:0009654;<br>P:GO:0015979;<br>C:GO:0019898 | F:calcium ion binding;<br>C:photosystem II oxygen evolving complex;<br>P:photosynthesis;<br>C:extrinsic component of membrane                                               |
| Xvis03_209551-PA | augustus-gene-8.71-mRNA-1 protein<br>Name:"Protein of unknown function"<br>AED:0.00<br>QI:115 1 1 1 1 1 3 283 52                | eAED:0.00 | C:GO:0000276;<br>F:GO:0015078;<br>P:GO:0015986                  | C:mitochondrial proton-transporting ATP synthase complex, coupling factor F(o);<br>F:proton transmembrane transporter activity;<br>P:ATP synthesis coupled proton transport |
| Xvis03_211981-PA | processed-gene-13.88-mRNA-1 protein<br>Name:"Protein of unknown function"<br>AED:0.39<br>QI:90 0.33 0.25 0.5 1 1 4 0 156        | eAED:0.39 | F:GO:0004867;<br>C:GO:0005576                                   | F:serine-type endopeptidase inhibitor activity;<br>C:extracellular region                                                                                                   |
| Xvis03_212079-PA | augustus-gene-19.87-mRNA-1 protein<br>Name:"Protein of unknown function"<br>AED:0.24<br>QI:126 1 0.90 1 0.6 0.45 11 424 1275    | eAED:0.24 | F:GO:0005515                                                    | F:protein binding                                                                                                                                                           |
| Xvis03_212518-PA | augustus-gene-6.13-mRNA-1 protein<br>Name:"Protein of unknown function"<br>AED:0.14<br>QI:93 1 0.5 1 1 1 2 0 537                | eAED:0.14 | F:GO:0003743                                                    | F:translation initiation factor activity                                                                                                                                    |
| Xvis03_212553-PA | augustus-gene-10.40-mRNA-1 protein<br>Name:"Protein of unknown function"<br>AED:0.16<br>QI:74 0.92 0.92 1 0.92 0.92 14 451 363  | eAED:0.16 | P:GO:1900034                                                    | P:regulation of cellular response to heat                                                                                                                                   |
| Xvis03_212807-PA | processed-gene-7.89-mRNA-1 protein<br>Name:"Protein of unknown function"<br>AED:0.10<br>QI:219 0.91 0.84 1 0.91 0.92 13 567 841 | eAED:0.10 | P:GO:0046373;<br>F:GO:0046556                                   | P:L-arabinose metabolic process;<br>F:alpha-L-arabinofuranosidase activity                                                                                                  |
| Xvis03_213271-PA | augustus-gene-4.72-mRNA-1 protein<br>Name:"Protein of unknown function"<br>AED:0.03<br>QI:529 1 1 1 1 1 5 472 382               | eAED:0.03 | F:GO:0005509                                                    | F:calcium ion binding                                                                                                                                                       |

|                  |                                                                                                                                        |                               |                                                                          |
|------------------|----------------------------------------------------------------------------------------------------------------------------------------|-------------------------------|--------------------------------------------------------------------------|
| Xvis03_213561-PA | augustus-gene-11.61-mRNA-1 protein<br>Name:"Protein of unknown function"<br>AED:0.05 eAED:0.05<br>QI:138 0.5 0.6 1 1 1 5 352 338       | F:GO:0003723                  | F:RNA binding                                                            |
| Xvis03_214461-PA | augustus-gene-14.50-mRNA-1 protein<br>Name:"Protein of unknown function"<br>AED:0.25 eAED:0.25<br>QI:166 1 1 1 0.88 0.9 10 542 839     | F:GO:0005515                  | F:protein binding                                                        |
| Xvis03_214462-PA | augustus-gene-14.52-mRNA-1 protein<br>Name:"Protein of unknown function"<br>AED:0.33 eAED:0.37<br>QI:0 0.72 0.66 0.83 1 1 12 303 933   | F:GO:0005515                  | F:protein binding                                                        |
| Xvis03_214558-PA | processed-gene-7.54-mRNA-1 protein<br>Name:"Protein of unknown function"<br>AED:0.02 eAED:0.02<br>QI:170 1 1 1 1 1 6 290 375           | F:GO:0003723                  | F:RNA binding                                                            |
| Xvis03_214692-PA | processed-gene-2.8-mRNA-1 protein<br>Name:"Protein of unknown function"<br>AED:0.04 eAED:0.04<br>QI:39 1 1 1 1 1 4 584 183             | P:GO:0000724;<br>F:GO:0003677 | P:double-strand break repair via homologous recombination; F:DNA binding |
| Xvis03_214790-PA | processed-gene-10.70-mRNA-1 protein<br>Name:"Protein of unknown function"<br>AED:0.08 eAED:0.08 QI:0 0 0 1 1 1 4 0 183                 | P:GO:0000724;<br>F:GO:0003677 | P:double-strand break repair via homologous recombination; F:DNA binding |
| Xvis03_214817-PA | processed-gene-12.12-mRNA-1 protein<br>Name:"Protein of unknown function"<br>AED:0.22 eAED:0.22<br>QI:0 0.5 0.55 1 1 1 9 386 285       | F:GO:0005515                  | F:protein binding                                                        |
| Xvis03_215263-PA | processed-gene-5.90-mRNA-1 protein<br>Name:"Protein of unknown function"<br>AED:0.07 eAED:0.07<br>QI:25 1 1 1 1 1 3 199 124            | C:GO:0009522;<br>P:GO:0015979 | C:photosystem I;<br>P:photosynthesis                                     |
| Xvis03_215636-PA | augustus-gene-11.1-mRNA-1 protein<br>Name:"Protein of unknown function"<br>AED:0.06 eAED:0.06<br>QI:45 0.87 0.88 1 0.87 0.88 9 510 884 | F:GO:0005515                  | F:protein binding                                                        |
| Xvis03_216099-PA | processed-gene-0.4-mRNA-1 protein<br>Name:"Protein of unknown function"<br>AED:0.04 eAED:0.04<br>QI:300 0.5 1 1 1 1 3 3437 201         | P:GO:0000724;<br>F:GO:0003677 | P:double-strand break repair via homologous recombination; F:DNA binding |

|                  |                                                                                                                                           |                               |                                                                            |
|------------------|-------------------------------------------------------------------------------------------------------------------------------------------|-------------------------------|----------------------------------------------------------------------------|
| Xvis03_217664-PA | augustus-gene-4.63-mRNA-1 protein<br>Name:"Protein of unknown function"<br>AED:0.25 eAED:0.25<br>QI:465 0.8 0.81 0.90 1 1 11 14 581       | F:GO:0003824                  | F:catalytic activity                                                       |
| Xvis03_217665-PA | est_gff_Cufflinks-gene-4.45-mRNA-1 protein<br>Name:"Protein of unknown function"<br>AED:0.33 eAED:0.33<br>QI:81 1 1 1 0 0.5 2 546 253     | P:GO:0046373;<br>F:GO:0046556 | P:L-arabinose metabolic process;<br>F:alpha-L-arabinofuranosidase activity |
| Xvis03_218355-PA | augustus-gene-4.74-mRNA-1 protein<br>Name:"Protein of unknown function"<br>AED:0.11 eAED:0.11<br>QI:176 0.66 0.85 1 0.83 1 7 900 405      | F:GO:0003723                  | F:RNA binding                                                              |
| Xvis03_219348-PA | augustus-gene-3.41-mRNA-1 protein<br>Name:"Protein of unknown function"<br>AED:0.07 eAED:0.07<br>QI:66 1 1 1 1 1 2 366 422                | F:GO:0003743                  | F:translation initiation factor activity                                   |
| Xvis03_219634-PA | processed-gene-3.2-mRNA-1 protein<br>Name:"Protein of unknown function"<br>AED:0.00 eAED:0.00<br>QI:123 1 1 1 1 1 3 533 203               | P:GO:0010183;<br>F:GO:0036033 | P:pollen tube guidance;<br>F:mediator complex binding                      |
| Xvis03_220523-PA | augustus-gene-3.91-mRNA-1 protein<br>Name:"Protein of unknown function"<br>AED:0.02 eAED:0.02<br>QI:101 1 1 1 0.5 0.33 3 285 67           |                               |                                                                            |
| Xvis03_220526-PA | augustus-gene-4.0-mRNA-1 protein<br>Name:"Protein of unknown function"<br>AED:0.61 eAED:0.63<br>QI:97 0.25 0.46 0.53 0.66 0.84 13 0 505   |                               |                                                                            |
| Xvis03_220783-PA | processed-gene-7.30-mRNA-1 protein<br>Name:"Protein of unknown function"<br>AED:0.03 eAED:0.03<br>QI:54 1 1 1 0.77 0.9 10 270 997         |                               |                                                                            |
| Xvis03_220839-PA | augustus-gene-7.57-mRNA-1 protein<br>Name:"Protein of unknown function"<br>AED:0.15 eAED:0.18<br>QI:0 0 0 0.85 1 0.85 7 0 1206            |                               |                                                                            |
| Xvis03_221114-PA | augustus-gene-7.153-mRNA-1 protein<br>Name:"Protein of unknown function"<br>AED:0.31 eAED:0.31<br>QI:37 0.81 0.91 0.91 0.90 0.91 12 0 389 | F:GO:0005515                  | F:protein binding                                                          |

|                  |                                                                                                                                      |  |  |
|------------------|--------------------------------------------------------------------------------------------------------------------------------------|--|--|
| Xvis03_221241-PA | processed-gene-5.4-mRNA-1 protein<br>Name:"Protein of unknown function"<br>AED:0.08 eAED:0.08<br>QI:245 0.2 0.66 0.66 1 1 6 196 274  |  |  |
| Xvis03_221245-PA | augustus-gene-5.32-mRNA-1 protein<br>Name:"Protein of unknown function"<br>AED:0.09 eAED:0.09<br>QI:132 0.75 0.8 1 0.5 0.8 5 329 209 |  |  |
| Xvis03_221584-PA | augustus-gene-3.67-mRNA-1 protein<br>Name:"Protein of unknown function"<br>AED:0.09 eAED:0.09<br>QI:0 1 0.88 1 1 1 9 315 844         |  |  |
| Xvis03_221586-PA | est_gff_Cufflinks-gene-3.18-mRNA-1 protein<br>Name:"Protein of unknown function"<br>AED:0.00 eAED:0.00<br>QI:74 1 1 1 0 0 2 161 102  |  |  |
| Xvis03_221803-PA | processed-gene-5.17-mRNA-1 protein<br>Name:"Protein of unknown function"<br>AED:0.41 eAED:0.41<br>QI:0 0.5 0.33 0.66 1 1 3 324 192   |  |  |
| Xvis03_221874-PA | processed-gene-3.62-mRNA-1 protein<br>Name:"Protein of unknown function"<br>AED:0.05 eAED:0.05<br>QI:40 1 1 1 1 1 3 57 223           |  |  |
| Xvis03_222141-PA | processed-gene-2.132-mRNA-1 protein<br>Name:"Protein of unknown function"<br>AED:0.05 eAED:0.05<br>QI:31 1 1 1 1 1 5 508 372         |  |  |
| Xvis03_222453-PA | augustus-gene-5.66-mRNA-1 protein<br>Name:"Protein of unknown function"<br>AED:0.10 eAED:0.10<br>QI:170 1 1 1 1 1 5 279 183          |  |  |
| Xvis03_222491-PA | augustus-gene-2.15-mRNA-1 protein<br>Name:"Protein of unknown function"<br>AED:0.03 eAED:0.03<br>QI:12 1 1 1 1 1 4 441 657           |  |  |
| Xvis03_222633-PA | processed-gene-2.6-mRNA-1 protein<br>Name:"Protein of unknown function"<br>AED:0.00 eAED:0.00<br>QI:74 1 1 1 1 1 2 188 155           |  |  |

|                  |                                                                                                                                   |  |  |
|------------------|-----------------------------------------------------------------------------------------------------------------------------------|--|--|
| Xvis03_223073-PA | processed-gene-1.5-mRNA-1 protein<br>Name:"Protein of unknown function"<br>AED:0.19 eAED:0.19<br>QI:0 0.5 0.33 0.66 1 1 3 248 338 |  |  |
| Xvis03_223402-PA | processed-gene-3.113-mRNA-1 protein<br>Name:"Protein of unknown function"<br>AED:0.15 eAED:0.15 QI:0 -1 0 1 -1 1 1 0 200          |  |  |
| Xvis03_223551-PA | augustus-gene-0.4-mRNA-1 protein<br>Name:"Protein of unknown function"<br>AED:0.05 eAED:0.05<br>QI:85 0.66 1 1 1 1 4 290 185      |  |  |
| Xvis03_223700-PA | processed-gene-0.36-mRNA-1 protein<br>Name:"Protein of unknown function"<br>AED:0.07 eAED:0.07<br>QI:74 0 0.66 0.66 1 1 3 231 183 |  |  |
| Xvis03_223934-PA | processed-gene-3.6-mRNA-1 protein<br>Name:"Protein of unknown function"<br>AED:0.65 eAED:0.65<br>QI:0 0.28 0.12 0.5 1 1 8 0 363   |  |  |
| Xvis03_224176-PA | processed-gene-0.70-mRNA-1 protein<br>Name:"Protein of unknown function"<br>AED:0.46 eAED:0.46 QI:0 -1 0 1 -1 1 1 0 84            |  |  |
| Xvis03_224299-PA | processed-gene-1.45-mRNA-1 protein<br>Name:"Protein of unknown function"<br>AED:0.17 eAED:0.17 QI:0 -1 0 1 -1 1 1 0 442           |  |  |
| Xvis03_224443-PA | processed-gene-2.98-mRNA-1 protein<br>Name:"Protein of unknown function"<br>AED:0.37 eAED:0.42 QI:0 0 0 1 1 1 2 0 148             |  |  |
| Xvis03_224539-PA | processed-gene-2.15-mRNA-1 protein<br>Name:"Protein of unknown function"<br>AED:0.34 eAED:0.34<br>QI:0 1 0.8 1 1 1 5 142 253      |  |  |
| Xvis03_224748-PA | augustus-gene-0.35-mRNA-1 protein<br>Name:"Protein of unknown function"<br>AED:0.10 eAED:0.10<br>QI:42 0.5 1 1 0.5 0.66 3 247 139 |  |  |
| Xvis03_224886-PA | augustus-gene-0.35-mRNA-1 protein<br>Name:"Protein of unknown function"<br>AED:0.15 eAED:0.15<br>QI:0 1 0.83 1 1 1 6 796 313      |  |  |



|                  |                                                                                                                                       |  |  |
|------------------|---------------------------------------------------------------------------------------------------------------------------------------|--|--|
| Xvis03_224919-PA | processed-gene-1.1-mRNA-1 protein<br>Name:"Protein of unknown function"<br>AED:0.11 eAED:0.11<br>QI:31 1 1 1 1 1 4 3638 250           |  |  |
| Xvis03_225115-PA | augustus-gene-0.198-mRNA-1 protein<br>Name:"Protein of unknown function"<br>AED:0.20 eAED:0.11<br>QI:39 0.71 0.75 1 1 0.87 8 1386 134 |  |  |
| Xvis03_225434-PA | augustus-gene-0.49-mRNA-1 protein<br>Name:"Protein of unknown function"<br>AED:0.01 eAED:0.01<br>QI:74 1 1 1 1 1 2 209 143            |  |  |
| Xvis03_225567-PA | processed-gene-0.22-mRNA-1 protein<br>Name:"Protein of unknown function"<br>AED:0.19 eAED:0.19<br>QI:0 0.16 0.14 0.71 1 1 7 86 485    |  |  |
| Xvis03_225590-PA | augustus-gene-0.1-mRNA-1 protein<br>Name:"Protein of unknown function"<br>AED:0.00 eAED:0.00<br>QI:185 1 1 1 1 1 2 42 261             |  |  |
| Xvis03_225702-PA | processed-gene-0.52-mRNA-1 protein<br>Name:"Protein of unknown function"<br>AED:0.28 eAED:0.28<br>QI:29 0.77 0.9 1 1 1 10 29 322      |  |  |

\*X. schlechteri database version 3

**Table S7:** Mapman BINs representing upregulated and downregulated *X. schlechteri* proteins at early response to drying.

| Bin | Name | Elements | p-value |
|-----|------|----------|---------|
|-----|------|----------|---------|

|     | Upregulated proteins at ERD           | (no.of proteins allocated)             |          |
|-----|---------------------------------------|----------------------------------------|----------|
| 35  | Not assigned                          | 11                                     | 0.676053 |
| 9   | Secondary metabolism                  | 2                                      | 0.791296 |
| 1   | Photosynthesis                        | 1                                      | 0.140458 |
| 4   | Amino acid metabolism                 | 1                                      | 0.140458 |
| 11  | Phytohormone action                   | 1                                      | 0.259640 |
| 25  | Nutrient uptake                       | 1                                      | 0.259640 |
| 5   | Lipid metabolism                      | 1                                      | 0.435156 |
| 2   | Cellular respiration                  | 1                                      | 0.664612 |
| Bin | Name<br>Downregulated proteins at ERD | Elements<br>(no.of proteins allocated) | p-value  |
| 7   | Co-enzyme metabolism                  | 5                                      | 0.785817 |
| 19  | Protein homeostasis                   | 4                                      | 0.335234 |
| 35  | Not assigned                          | 3                                      | 0.276986 |
| 3   | Carbohydrate metabolism               | 2                                      | 0.045141 |
| 1   | Photosynthesis                        | 2                                      | 0.920212 |
| 6   | Nucleotide metabolism                 | 2                                      | 0.920212 |
| 2   | Cellular respiration                  | 1                                      | 0.127153 |
| 17  | Protein biosynthesis                  | 1                                      | 0.165518 |
| 22  | Vesicle trafficking                   | 1                                      | 0.405381 |
| 26  | External stimuli response             | 1                                      | 0.488074 |
| 27  | Multi-process regulation              | 1                                      | 1        |

**Table S8:** Mapman BINs representing upregulated and downregulated *X. schlechteri* proteins at Mid response to drying.

| Bin | Name<br>Upregulated proteins at MRD | Elements<br>(no.of proteins allocated) | p-value  |
|-----|-------------------------------------|----------------------------------------|----------|
| 35  | Not assigned                        | 2                                      | 0.029297 |
| 19  | Protein homeostasis                 | 2                                      | 0.028108 |
| 3   | Carbohydrate metabolism             | 2                                      | 0.107347 |
| 5   | Lipid metabolism                    | 2                                      | 0.941653 |
| 9   | Secondary metabolism                | 1                                      | 0.114128 |
| 12  | Chromatin organisation              | 1                                      | 0.202622 |
| 2   | Cellular respiration                | 1                                      | 0.332880 |
| 17  | Protein biosynthesis                | 1                                      | 0.798859 |
| 16  | RNA processing                      | 1                                      | 0.878482 |
| 26  | External stimuli response           | 1                                      | 0.878482 |

| Bin | Name<br>Downregulated proteins<br>at MRD | Elements (no.of proteins<br>allocated) | p-value  |
|-----|------------------------------------------|----------------------------------------|----------|
| 1   | Photosynthesis                           | 27                                     | 2.71E-04 |
| 35  | Not assigned                             | 16                                     | 0.481927 |
| 17  | Protein biosynthesis                     | 11                                     | 0.297923 |
| 19  | Protein homeostasis                      | 6                                      | 0.855506 |
| 3   | Carbohydrate metabolism                  | 5                                      | 0.002388 |
| 2   | Cellular respiration                     | 5                                      | 0.185229 |
| 10  | Redox homeostasis                        | 5                                      | 0.210305 |
| 4   | Amino acid metabolism                    | 2                                      | 0.207697 |
| 21  | Cell wall organisation                   | 2                                      | 0.287358 |
| 18  | Protein modification                     | 2                                      | 0.575503 |
| 16  | RNA processing                           | 2                                      | 0.910829 |
| 6   | Nucleotide metabolism                    | 2                                      | 0.933061 |
| 27  | Multi-process regulation                 | 1                                      | 0.150744 |
| 26  | External stimuli response                | 1                                      | 0.245505 |
| 22  | Vesicle trafficking                      | 1                                      | 0.442687 |
| 7   | Co-enzyme metabolism                     | 1                                      | 0.921600 |

**Table S9:** Mapman BINs representing upregulated and downregulated *X. schlechteri* proteins at late response to drying.

| Bin | Name<br>Upregulated proteins<br>at LRD | Elements (no.of proteins<br>allocated) | p-value  |
|-----|----------------------------------------|----------------------------------------|----------|
| 35  | Not assigned                           | 48                                     | 3.66E-04 |
| 17  | Protein biosynthesis                   | 14                                     | 0.350356 |
| 7   | Co-enzyme metabolism                   | 5                                      | 0.701357 |
| 1   | Photosynthesis                         | 4                                      | 0.004989 |
| 18  | Protein modification                   | 4                                      | 0.067196 |
| 5   | Lipid metabolism                       | 4                                      | 0.776159 |
| 16  | RNA processing                         | 4                                      | 0.845021 |
| 10  | Redox homeostasis                      | 3                                      | 0.060389 |
| 19  | Protein homeostasis                    | 3                                      | 0.213074 |
| 26  | External stimuli response              | 3                                      | 0.775051 |
| 9   | Secondary metabolism                   | 3                                      | 0.806496 |
| 23  | Protein translocation                  | 3                                      | 0.854240 |
| 2   | Cellular respiration                   | 2                                      | 0.156297 |
| 3   | Carbohydrate metabolism                | 1                                      | 0.086411 |
| 13  | Cell cycle organisation                | 1                                      | 0.506139 |
| 14  | DNA damage response                    | 1                                      | 0.506139 |
| 15  | RNA biosynthesis                       | 1                                      | 0.551926 |

| Bin | Name<br>Downregulated proteins<br>at LRD | Elements (no.of proteins<br>allocated) | p-value  |
|-----|------------------------------------------|----------------------------------------|----------|
| 1   | Photosynthesis                           | 16                                     | 0.021967 |
| 35  | Not assigned                             | 14                                     | 0.335041 |
| 3   | Carbohydrate metabolism                  | 6                                      | 0.241955 |
| 19  | Protein homeostasis                      | 4                                      | 0.364960 |
| 10  | Redox homeostasis                        | 3                                      | 0.497135 |
| 21  | Cell wall organisation                   | 2                                      | 0.340023 |
| 7   | Co-enzyme metabolism                     | 2                                      | 0.896482 |
| 17  | Protein biosynthesis                     | 2                                      | 0.965407 |
| 27  | Multi-process regulation                 | 1                                      | 0.273913 |
| 26  | External stimuli response                | 1                                      | 0.465759 |
| 4   | Amino acid metabolism                    | 1                                      | 0.584346 |
| 2   | Cellular respiration                     | 1                                      | 0.715337 |
| 22  | Vesicle trafficking                      | 1                                      | 0.761192 |

**Table S10:** List of the Bin names, id and description of the upregulated proteins at ERD

| BinName                                                                                                                           | id                   | Description                                                                                                                                                                                                                           |
|-----------------------------------------------------------------------------------------------------------------------------------|----------------------|---------------------------------------------------------------------------------------------------------------------------------------------------------------------------------------------------------------------------------------|
| <b>Secondary metabolism.</b><br>phenolics.flavonoid<br>biosynthesis.flavonol<br>glycosides.flavonol-3-O-<br>rhamnosyltransferase' | xvis03_211917-<br>pa | flavonol-3-O-rhamnosyltransferase (original<br>description: augustus-gene-8.2-mRNA-1 protein<br>Name:Similar to UGT78D2 UDP-<br>glycosyltransferase 78D2 (Arabidopsis thaliana)<br>AED:0.00 eAED:0.00<br>QI:173 1 1 1 1 1 2 210 454)' |
| <b>Secondary metabolism.</b><br>phenolics.flavonoid<br>biosynthesis.aurones.aureusidin synthase'                                  | xvis03_203578-<br>pa | aureusidin synthase (original description:<br>augustus-gene-30.42-mRNA-1 protein<br>Name:Similar to Polyphenol oxidase,<br>chloroplastic (Vitis vinifera) AED:0.01<br>eAED:0.01 QI:30 1 1 1 1 1 2 191 591)'                           |

**Table S11:** List of the Bin names, id and description of the downregulated proteins at ERD

| BinName | id | Description |
|---------|----|-------------|
|---------|----|-------------|

|                                                                                                                                                                                                                                                                        |                                      |                                                                                                                                                                                                                                                                                                                                                                                                                                                                                     |
|------------------------------------------------------------------------------------------------------------------------------------------------------------------------------------------------------------------------------------------------------------------------|--------------------------------------|-------------------------------------------------------------------------------------------------------------------------------------------------------------------------------------------------------------------------------------------------------------------------------------------------------------------------------------------------------------------------------------------------------------------------------------------------------------------------------------|
| <b>Coenzyme</b> <b>metabolism</b> .tetrapyrrol<br>biosynthesis.uroporphyrinogen III<br>formation.porphobilinogen deaminase'                                                                                                                                            | xvis03_202672-pa                     | porphobilinogen deaminase<br>(original description:<br>processed-gene-54.103-<br>mRNA-1 protein                                                                                                                                                                                                                                                                                                                                                                                     |
| <b>Coenzyme</b> <b>metabolism</b> .tetrapyrrol<br>biosynthesis.chlorophyll<br>metabolism.chlorophyll(ide)<br>interconversions.geranylgeranyl reductase (Chlp)'                                                                                                         | xvis03_215774-pa                     | Name:Similar to HEMC<br>geranylgeranyl reductase (Chlp)<br>Porphobilinogen deaminase,<br>(original description: augustus-gene-<br>chloroplastic (Oryza sativa<br>7.23-mRNA-1 protein Name:Similar<br>subsp. japonica) AED:0.01<br>to CHLP Geranylgeranyl diphosphate<br>eAED:0.01<br>reductase, chloroplastic (Nicotiana<br>glauca) AED:0.00 eAED:0.00<br>QI:117 1 1 1 1 5 327 378                                                                                                  |
| <b>Coenzyme</b> <b>metabolism</b> .tetrapyrrol<br>biosynthesis.chlorophyll metabolism.Mg-<br><b>protein</b> <b>homeostasis</b> .protein quality<br>protoporphyrin IX O-methyltransferase'<br>control.Hsp90 chaperone system.chaperone<br>(Hsp90)'                      | xvis03_200416-pa<br>xvis03_207665-pa | Mg-protoporphyrin IX O-<br>methyltransferase (original<br>chaperone (Hsp90) (original<br>description: processed-gene-<br>description: processed-gene-<br>51.69-mRNA-1 protein<br>12.71-mRNA-1 protein<br>Name:Similar to CHLM<br>Name:Similar to HSP90<br>Magnesium protoporphyrin IX<br>Endoplasmic reticulum<br>methyltransferase, chloroplastic<br>(Catharanthus roseus)<br>(Arabidopsis thaliana)<br>AED:0.12 eAED:0.12<br>AED:0.34 eAED:0.34 QI:0 <br>QI:42 1 1 1 1 15 358 812 |
| <b>protein</b> <b>homeostasis</b> .protein quality<br>control.Hsp90 chaperone system.chaperone<br><b>Coenzyme</b> <b>metabolism</b> .tetrapyrrol<br>biosynthesis.chlorophyll<br>metabolism.protochlorophyllide oxidoreductase (pOR)<br>activities.light-dependent pOR' | xvis03_224897-pa<br>xvis03_212894-pa | chaperone (Hsp90) (original<br>description: augustus-gene-<br>1.57-<br>light-dependent<br>mRNA-1 protein Name:Similar to<br>protochlorophyllide<br>HSP90 Endoplasmic reticulum<br>oxidoreductase (original<br>(Catharanthus roseus) AED:0.10<br>description: augustus-gene- 2.1-<br>eAED:0.10<br>mRNA-1 protein Name:Similar<br>QI:52 0.92 0.93 1 1 15 395 788                                                                                                                      |
| <b>protein</b> <b>homeostasis</b> .ubiquitin-proteasome                                                                                                                                                                                                                | xvis03_212052-pa                     | to PORB Protochlorophyllide<br>regulatory component RPN8 of<br>reductase B, chloroplastic<br>(Hordeum vulgare) AED:0.09<br>eAED:0.09<br>QI:162 1 1 1 1 1 5 457 393                                                                                                                                                                                                                                                                                                                  |
| <b>Coenzyme</b> <b>metabolism</b> .tetrapyrrol<br>biosynthesis.chlorophyll<br>system.26S proteasome.19S regulatory<br>partial.19S regulatory<br>oxidoreductase (pOR) activities.light-<br>dependent pOR'                                                               | xvis03_218927-pa                     | light-dependent<br>protochlorophyllide<br>26S proteasome (original<br>description: augustus-gene-<br>18.3-mRNA-1 protein<br>Name:Similar to RPN8 of<br>Name:Similar to RPN8 of<br>reductase B, chloroplastic<br>proteasome non-ATPase<br>(Hordeum vulgare) AED:0.12<br>regulatory subunit 7 homolog<br>(Arabidopsis thaliana)<br>QI:128 0.75 0.6 1 1 1 5 341 353 <br>AED:0.29 eAED:0.29<br>QI:0 0.9 0.81 0.90 1 1 1 444 3<br>63                                                     |

|                                                                                                                                         |                  |                                                                                                                                                                                                                                                                                            |
|-----------------------------------------------------------------------------------------------------------------------------------------|------------------|--------------------------------------------------------------------------------------------------------------------------------------------------------------------------------------------------------------------------------------------------------------------------------------------|
| <b>protein homeostasis</b> .proteolysis.cysteine-type peptidase activities.C13-class asparaginyl endopeptidase (Legumain)'              | xvis03_211268-pa | asparaginyl endopeptidase (Legumain) (original description: processed-gene-9.25-mRNA-1 protein Name:Similar to Vacuolar-processing enzyme (Citrus sinensis) AED:0.07 eAED:0.07 QI:3 1 1 1 1 9 417 590)'                                                                                    |
| <b>Carbohydrate metabolism</b> .oxidative pentose phosphate pathway.oxidative phase.6-phosphogluconolactonase'                          | xvis03_213363-pa | 6-phosphogluconolactonase (original description: processed-gene-12.66-mRNA-1 protein Name:Similar to Os09g0529100 Probable 6-                                                                                                                                                              |
|                                                                                                                                         |                  | phosphogluconolactonase 4, chloroplastic (Oryza sativa subsp. japonica) AED:0.04 eAED:0.04 QI:89 1 1 1 1 3 259 276)'                                                                                                                                                                       |
| <b>Carbohydrate metabolism</b> .oxidative pentose phosphate pathway.non-oxidative phase.transaldolase'                                  | xvis03_219185-pa | transaldolase (original description: processed-gene-8.51-mRNA-1 protein Name:Similar to tal Transaldolase (Acidothermus cellulolyticus (strain ATCC 43068 / 11B)) AED:0.03 eAED:0.03 QI:60 0.83 0.85 1 1 1 7 483 446)'                                                                     |
| <b>photosynthesis</b> .photophosphorylation.cytochrome b6/f complex.Rieske iron-sulfur component petC'                                  | xvis03_223095-pa | Rieske iron-sulfur component PetC of cytochrome b6/f complex (original description: augustus-gene-3.96-mRNA-1 protein Name:Similar to petC Cytochrome b6-f complex iron-sulfur subunit, chloroplastic (Oryza sativa subsp. japonica) AED:0.11 eAED:0.11 QI:167 0.33 0.75 1 1 1 4 287 178)' |
| <b>photosynthesis</b> .photophosphorylation.chlororespiration.NADH dehydrogenase-like (NDH) complex.lumen subcomplex L.component pnsL1' | xvis03_203608-pa | component PnsL1 of NDH lumen subcomplex L (original description: processed-gene-                                                                                                                                                                                                           |

|                                                                                 |                  |                                                                                                                                                                                                                                                                  |
|---------------------------------------------------------------------------------|------------------|------------------------------------------------------------------------------------------------------------------------------------------------------------------------------------------------------------------------------------------------------------------|
|                                                                                 |                  | 32.69-mRNA-1 protein<br>Name: Similar to PNSL1<br>Photosynthetic NDH subunit<br>of lumenal location 1,<br>chloroplastic (Arabidopsis<br>thaliana) AED:0.12<br>eAED:0.08<br>QI:81 1 0.85 1 1 1 7 565 263)'                                                        |
| <b>Nucleotide<br/>metabolism.purines.phosphotransfers.adenylate<br/>kinase'</b> | xvis03_207311-pa | adenylate kinase (original<br>description: processed-gene-<br>7.62-mRNA-1 protein<br>Name: Similar to ADK-B<br>Adenylate kinase 4 (Oryza<br>sativa subsp. japonica)<br>AED:0.05 eAED:0.05<br>QI:122 1 1 1 1 1 6 379 246)'                                        |
| <b>Nucleotide<br/>metabolism.purines.phosphotransfers.adenylate<br/>kinase'</b> | xvis03_213605-pa | adenylate kinase (original<br>description: processed-gene-<br>14.84-mRNA-1 protein<br>Name: Similar to<br>Os08g0288200 Probable<br>adenylate kinase 5,<br>chloroplastic (Oryza sativa<br>subsp. japonica) AED:0.22<br>eAED:0.22<br>QI:25 1 0.94 1 1 1 17 0 611)' |

**Table S12:** List of the Bin names, id and description of the upregulated proteins at MRD

| BinName                                                                                                        | id                   | Description                                                                                                                                                                                                                     |
|----------------------------------------------------------------------------------------------------------------|----------------------|---------------------------------------------------------------------------------------------------------------------------------------------------------------------------------------------------------------------------------|
| <b>protein homeostasis.protein quality<br/>control.cytosolic Hsp70 chaperone<br/>system.chaperone (Hsp70)'</b> | xvis03_22222<br>3-pa | chaperone (Hsp70) (original<br>description: processed-gene-2.73-<br>mRNA-1 protein Name: Similar to<br>HSP70 Heat shock cognate 70 kDa<br>protein (Petunia hybrida) AED:0.11<br>eAED:0.11<br>QI:205 0.5 0.33 0.66 1 1 3 0 710)' |

|                                                                                                                                                             |                      |                                                                                                                                                                                                                                                  |
|-------------------------------------------------------------------------------------------------------------------------------------------------------------|----------------------|--------------------------------------------------------------------------------------------------------------------------------------------------------------------------------------------------------------------------------------------------|
| <b>protein homeostasis.ubiquitin-proteasome system.ubiquitin-fold protein conjugation.RUB/NEDD8 conjugation (neddylation).ubiquitin-fold protein (RUB)'</b> | xvis03_20581<br>3-pa | ubiquitin-fold protein (RUB) (original description: processed-gene-6.86-mRNA-1 protein Name: Similar to RUB2 Ubiquitin-NEDD8-like protein RUB2 (Oryza sativa subsp. japonica) AED:0.04 eAED:0.04 QI:73 1 1 1 1 1 3 301 153)'                     |
| <b>Carbohydrate metabolism.sucrose metabolism.biosynthesis.cytosolic UDP-glucose pyrophosphorylase'</b>                                                     | xvis03_20212<br>4-pa | cytosolic UDP-glucose pyrophosphorylase (original description: processed-gene-11.0-mRNA-1 protein Name: Similar to UGPA UTP--glucose-1-phosphate uridylyltransferase (Musa acuminata) AED:0.18 eAED:0.18 QI:271 0.88 0.89 1 1 1 19 372 458)'     |
| <b>Carbohydrate metabolism.starch metabolism.degradation.maltose metabolism.cytosolic alpha-glucan phosphorylase'</b>                                       | xvis03_20465<br>9-pa | cytosolic alpha-glucan phosphorylase (original description: augustus-gene-39.13-mRNA-1 protein Name: Similar to PHS2 Alpha-glucan phosphorylase 2, cytosolic (Arabidopsis thaliana) AED:0.23 eAED:0.23 QI:181 0.92 0.93 1 0.92 0.86 15 169 732)' |
| <b>Lipid metabolism.glycerolipid biosynthesis.phosphatidylcholine.CTp:phosphorylcholine cytidylyltransferase'</b>                                           | xvis03_20265<br>5-pa | CTP:phosphorylcholine cytidylyltransferase (original description: processed-gene-53.13-mRNA-1 protein Name: Similar to CCT2 Choline-phosphate cytidylyltransferase 2 (Arabidopsis thaliana) AED:0.15 eAED:0.15 QI:50 1 1 1 1 1 8 392 291)'       |
| <b>Lipid metabolism.lipid degradation.phospholipase activities.phospholipase A2 activities.phospholipase A2 (ppLA2-II)'</b>                                 | xvis03_21820<br>0-pa | phospholipase A2 (pPLA2-II) (original description: augustus-gene-6.42-mRNA-1 protein Name: Similar to PLP1 Patatin-like protein 1 (Oryza sativa subsp. japonica) AED:0.26 eAED:0.26 QI:72 0.4 0.16 1 1 1 6 0 314)'                               |



**Table S13:** List of the Bin names, id and description of the downregulated proteins at MRD

| BinName                                                                                        | id                   | Description                                                                                                                                                                                                                                    |
|------------------------------------------------------------------------------------------------|----------------------|------------------------------------------------------------------------------------------------------------------------------------------------------------------------------------------------------------------------------------------------|
| <b>photosynthesis</b> .photophosphorylation.photosystem II.LHC-II complex.component LHCb1/2/3' | xvis03_2110<br>60-pa | component LHCb1/2/3 of LHC-II complex (original description: processed-gene-14.7-mRNA-1 protein Name:Similar to Chlorophyll a-b binding protein, chloroplastic (Spinacia oleracea) AED:0.01 eAED:0.01 QI:0 -1 0 1 -1 1 1 0 268)'               |
| <b>photosynthesis</b> .photophosphorylation.photosystem II.LHC-II complex.component LHCb1/2/3' | xvis03_2197<br>22-pa | component LHCb1/2/3 of LHC-II complex (original description: augustus-gene-9.73-mRNA-1 protein Name:Similar to CAB36 Chlorophyll a-b binding protein 36, chloroplastic (Nicotiana tabacum) AED:0.36 eAED:0.36 QI:240 1 1 1 1 1 2 393 264)'     |
| <b>photosynthesis</b> .photophosphorylation.photosystem II.LHC-II complex.component LHCb1/2/3' | xvis03_2230<br>77-pa | component LHCb1/2/3 of LHC-II complex (original description: processed-gene-1.89-mRNA-1 protein Name:Similar to CAB13 Chlorophyll a-b binding protein 13, chloroplastic (Solanum lycopersicum) AED:0.07 eAED:0.07 QI:182 1 1 1 1 1 4 188 263)' |
| <b>photosynthesis</b> .photophosphorylation.photosystem II.LHC-II complex.component LHCb1/2/3' | xvis03_2246<br>54-pa | component LHCb1/2/3 of LHC-II complex (original description: processed-gene-1.9-mRNA-1 protein Name:Similar to CAB21 Chlorophyll a-b binding protein 21, chloroplastic (Nicotiana tabacum) AED:0.11 eAED:0.11 QI:0 0 0 0.5 1 1 2 0 328)'       |
| <b>photosynthesis</b> .photophosphorylation.photosystem II.LHC-II complex.component LHCb1/2/3' | xvis03_2250<br>66-pa | component LHCb1/2/3 of LHC-II complex (original description: processed-gene-0.82-mRNA-1 protein Name:Similar to Chlorophyll a-b binding protein,                                                                                               |

|                                                                                                                                                |                      |                                                                                                                                                                                                                                                                 |
|------------------------------------------------------------------------------------------------------------------------------------------------|----------------------|-----------------------------------------------------------------------------------------------------------------------------------------------------------------------------------------------------------------------------------------------------------------|
|                                                                                                                                                |                      | chloroplastic (Spinacia oleracea)<br>AED:0.00 eAED:0.00 QI:0 -1 0 1 -<br>1 1 1 0 268)'                                                                                                                                                                          |
| <b>photosynthesis</b> .photophosphorylation.photosystem II.LHC-II complex.component LHCb4'                                                     | xvis03_2127<br>11-pa | component LHCb4 of LHC-II complex (original description: processed-gene-16.130-mRNA-1 protein Name:Similar to LHCB4.2 Chlorophyll a-b binding protein CP29.2, chloroplastic (Arabidopsis thaliana) AED:0.05 eAED:0.05 QI:1875 1 1 1 0.5 0.33 3 204 289)'        |
| <b>photosynthesis</b> .photophosphorylation.photosystem II.LHC-II complex.component LHCb5'                                                     | xvis03_2217<br>99-pa | component LHCb5 of LHC-II complex (original description: processed-gene-5.86-mRNA-1 protein Name:Similar to LHCB5 Chlorophyll a-b binding protein CP26, chloroplastic (Arabidopsis thaliana) AED:0.06 eAED:0.06 QI:123 0.8 0.83 1 1 1 6 161 279)'               |
| <b>photosynthesis</b> .photophosphorylation.photosystem II.LHC-II complex.component LHCb6'                                                     | xvis03_2079<br>68-pa | component LHCb6 of LHC-II complex (original description: augustus-gene-15.42-mRNA-1 protein Name:Similar to CAP10A Chlorophyll a-b binding protein CP24 10A, chloroplastic (Solanum lycopersicum) AED:0.00 eAED:0.00 QI:218 1 1 1 1 1 2 259 254)'               |
| <b>photosynthesis</b> .photophosphorylation.photosystem II.pS-II complex.oxygen-evolving center (OEC) extrinsic proteins.component OEC33/psbO' | xvis03_2083<br>37-pa | component PsbO/OEC33 of PS-II oxygen-evolving center (original description: augustus-gene-6.16-mRNA-1 protein Name:Similar to PSBO Oxygen-evolving enhancer protein 1, chloroplastic (Solanum lycopersicum) AED:0.08 eAED:0.08 QI:229 1 1 1 0.5 0.33 3 86 332)' |

|                                                                                                                                                                                  |                      |                                                                                                                                                                                                                                                           |
|----------------------------------------------------------------------------------------------------------------------------------------------------------------------------------|----------------------|-----------------------------------------------------------------------------------------------------------------------------------------------------------------------------------------------------------------------------------------------------------|
| <b>photosynthesis</b> .photophosphorylation.photosystem II.pS-II complex.oxygen-evolving center (OEC) extrinsic proteins.component OEC33/psbO'                                   | xvis03_2198<br>59-pa | component PsbO/OEC33 of PS-II oxygen-evolving center (original description: augustus-gene-3.73-mRNA-1 protein Name:Similar to PSBO Oxygen-evolving enhancer protein 1, chloroplastic (Solanum lycopersicum) AED:0.03 eAED:0.03 QI:216 1 1 1 1 2 224 332)' |
| <b>photosynthesis</b> .photophosphorylation.photosystem II.pS-II complex.oxygen-evolving center (OEC) extrinsic proteins.Viridiplantae-specific components.component OEC23/psbp' | xvis03_2099<br>88-pa | component PsbP of PS-II oxygen-evolving center (original description: processed-gene-2.101-mRNA-1 protein Name:Similar to PSBP Oxygen-evolving enhancer protein 2, chloroplastic (Cucumis sativus) AED:0.32 eAED:0.32 QI:142 1 1 1 1 1 4 296 262)'        |
| <b>photosynthesis</b> .photophosphorylation.photosystem II.assembly and maintenance.assembly factor (MET1)'                                                                      | xvis03_2215<br>70-pa | MET1 protein involved in PS-II assembly (original description: augustus-gene-2.10-mRNA-1 protein Name:Similar to LSF1 Phosphoglucan phosphatase LSF1, chloroplastic (Arabidopsis thaliana) AED:0.06 eAED:0.06 QI:233 0.83 0.71 1 0.5 0.42 7 831 301)'     |
| <b>photosynthesis</b> .photophosphorylation.cytochrome b6/f complex.Rieske iron-sulfur component petC'                                                                           | xvis03_2230<br>95-pa | Rieske iron-sulfur component PetC of cytochrome b6/f complex (original description: augustus-                                                                                                                                                             |

|                                                                                              |                      |                                                                                                                                                                                                                                                    |
|----------------------------------------------------------------------------------------------|----------------------|----------------------------------------------------------------------------------------------------------------------------------------------------------------------------------------------------------------------------------------------------|
|                                                                                              |                      | gene-3.96-mRNA-1 protein<br>Name:Similar to petC Cytochrome b6-f complex iron-sulfur subunit, chloroplastic (Oryza sativa subsp. japonica) AED:0.11 eAED:0.11<br>QI:167 0.33 0.75 1 1 1 4 287 178)'                                                |
| <b>photosynthesis.</b> photophosphorylation. Cytb6/f to pS-I electron carriers.plastocyanin' | xvis03_2177<br>29-pa | plastocyanin electron carrier<br>(original description: processed-gene-11.5-mRNA-1 protein<br>Name:Similar to PETE Plastocyanin minor isoform, chloroplastic (Arabidopsis thaliana) AED:0.37 eAED:0.37<br>QI:0 0 0 0.16 1 1 6 0 366)'              |
| <b>photosynthesis.</b> photophosphorylation.photosystem I.LHC-I complex.component LHCA1'     | xvis03_2251<br>47-pa | component LHCA1 of LHC-I complex (original description: augustus-gene-0.41-mRNA-1 protein Name:Similar to CAB6A Chlorophyll a-b binding protein 6A, chloroplastic (Solanum lycopersicum) AED:0.00 eAED:0.00<br>QI:106 1 1 1 1 1 3 75 204)'         |
| <b>photosynthesis.</b> photophosphorylation.photosystem I.LHC-I complex.component LHCA1'     | xvis03_2258<br>29-pa | component LHCA1 of LHC-I complex (original description: augustus-gene-0.17-mRNA-1 protein Name:Similar to LHCA1 Chlorophyll a-b binding protein 6, chloroplastic (Arabidopsis thaliana) AED:0.45 eAED:0.45<br>QI:0 0.44 0.4 0.5 1 1 10 334 459)'   |
| <b>photosynthesis.</b> photophosphorylation.photosystem I.pS-I complex.component psaH'       | xvis03_2053<br>19-pa | component PsaH of PS-I complex (original description: processed-gene-30.54-mRNA-1 protein Name:Similar to PSAH1 Photosystem I reaction center subunit VI-1, chloroplastic (Arabidopsis thaliana) AED:0.09 eAED:0.09<br>QI:15 1 1 1 1 1 3 336 145)' |

|                                                                                                                                           |                      |                                                                                                                                                                                                                                        |
|-------------------------------------------------------------------------------------------------------------------------------------------|----------------------|----------------------------------------------------------------------------------------------------------------------------------------------------------------------------------------------------------------------------------------|
| <b>photosynthesis</b> .photophosphorylation.linear electron flow.ferredoxin-NADp reductase (FNR) activity.ferredoxin-NADp oxidoreductase' | xvis03_2076<br>68-pa | ferredoxin-NADP oxidoreductase (original description: processed-gene-12.85-mRNA-1 protein Name:Similar to PETH Ferredoxin--NADP reductase, leaf isozyme, chloroplastic (Pisum sativum) AED:0.14 eAED:0.14 QI:231 1 1 1 1 1 9 392 366)' |
| <b>photosynthesis</b> .photophosphorylation.chlororespiration.NADH dehydrogenase-like (NDH) complex.lumen subcomplex L.component pnsL1'   | xvis03_2036<br>08-pa | component PnsL1 of NDH lumen subcomplex L (original description: processed-gene-32.69-mRNA-1 protein Name:Similar to PNSL1 Photosynthetic NDH subunit of lumenal location 1, chloroplastic (Arabidopsis thaliana)                      |

|                                                                                                                                          |                      |                                                                                                                                                                                                                                                                                           |
|------------------------------------------------------------------------------------------------------------------------------------------|----------------------|-------------------------------------------------------------------------------------------------------------------------------------------------------------------------------------------------------------------------------------------------------------------------------------------|
|                                                                                                                                          |                      | AED:0.12 eAED:0.08<br>QI:81 1 0.85 1 1 1 7 565 263)'                                                                                                                                                                                                                                      |
| <b>photosynthesis</b> .calvin cycle.ribulose-1,5-bisphosphat carboxylase/oxygenase (RuBisCo) activity.RuBisCo heterodimer.small subunit' | xvis03_2231<br>44-pa | small subunit of ribulose-1,5-bisphosphat carboxylase/oxygenase heterodimer (original description: processed-gene-3.56-mRNA-1 protein Name:Similar to RBCS1 Ribulose bisphosphate carboxylase small chain, chloroplastic (Musa acuminata) AED:0.05 eAED:0.05 QI:145 1 1 1 1 1 3 356 174)' |

|                                                                                                                                                             |                      |                                                                                                                                                                                                                                                                                                               |
|-------------------------------------------------------------------------------------------------------------------------------------------------------------|----------------------|---------------------------------------------------------------------------------------------------------------------------------------------------------------------------------------------------------------------------------------------------------------------------------------------------------------|
| <b>photosynthesis.calvin cycle.ribulose-1,5-bisphosphat</b><br>carboxylase/oxygenase (RuBisCo) activity.RuBisCo<br>assembly.auxiliary co-chaperone (CpN20)' | xvis03_2069<br>91-pa | CPN20 auxiliary co-chaperone<br>involved in RuBisCo assembly<br>(original description: augustus-<br>gene-10.52-mRNA-1 protein<br>Name:Similar to CPN21 20 kDa<br>chaperonin, chloroplastic<br>(Arabidopsis thaliana) AED:0.07<br>eAED:0.07<br>QI:99 1 1 1 1 5 439 254)'                                       |
| <b>photosynthesis.calvin cycle.ribulose-1,5-bisphosphat</b><br>carboxylase/oxygenase (RuBisCo) activity.RuBisCo<br>assembly.auxiliary co-chaperone (CpN20)' | xvis03_2170<br>41-pa | CPN20 auxiliary co-chaperone<br>involved in RuBisCo assembly<br>(original description: augustus-<br>gene-12.20-mRNA-1 protein<br>Name:Similar to CPN21 20 kDa<br>chaperonin, chloroplastic<br>(Arabidopsis thaliana) AED:0.12<br>eAED:0.12<br>QI:32 0.33 0.71 0.71 1 1 7 174 298)'                            |
| <b>photosynthesis.calvin cycle.ribulose-1,5-bisphosphat</b><br>carboxylase/oxygenase (RuBisCo) activity.RuBisCo<br>regulation.ATp-dependent activase (RCA)' | xvis03_2238<br>53-pa | ATP-dependent activase involved<br>in RuBisCo regulation (original<br>description: processed-gene-1.15-<br>mRNA-1 protein Name:Similar to<br>RCA2 Ribulose bisphosphate<br>carboxylase/oxygenase activase 2,<br>chloroplastic (Larrea tridentata)<br>AED:0.12 eAED:0.12<br>QI:111 1 1 1 0.83 0.71 7 332 438)' |
| <b>photosynthesis.calvin cycle.triosephosphate</b><br>isomerase'                                                                                            | xvis03_2242<br>25-pa | triosephosphate isomerase (original<br>description: augustus-gene-0.55-<br>mRNA-1 protein Name:Similar to<br>TPIP1 Triosephosphate isomerase,<br>chloroplastic (Spinacia oleracea)<br>AED:0.32 eAED:0.32<br>QI:0 0 0 0.55 0.87 1 9 0 311)'                                                                    |
| <b>photosynthesis.calvin cycle.transketolase'</b>                                                                                                           | xvis03_2077<br>74-pa | transketolase (original description:<br>processed-gene-21.50-mRNA-1<br>protein Name:Similar to<br>Transketolase, chloroplastic<br>(Solanum tuberosum) AED:0.17<br>eAED:0.17<br>QI:154 0.85 0.75 1 1 1 8 0 716)'                                                                                               |

|                                                                                                            |                      |                                                                                                                                                                                                                                     |
|------------------------------------------------------------------------------------------------------------|----------------------|-------------------------------------------------------------------------------------------------------------------------------------------------------------------------------------------------------------------------------------|
| <b>photosynthesis.calvin cycle.transketolase'</b>                                                          | xvis03_2190<br>01-pa | transketolase (original description: processed-gene-2.79-mRNA-1 protein Name:Similar to Transketolase, chloroplastic (Solanum tuberosum) AED:0.04 eAED:0.04 QI:238 1 1 1 1 7 473 742)'                                              |
| <b>photosynthesis.photorespiration.serine hydroxymethyltransferase (SHM)'</b>                              | xvis03_2080<br>40-pa | serine hydroxymethyltransferase (original description: processed-gene-21.10-mRNA-1 protein Name:Similar to SHM4 Serine hydroxymethyltransferase 4 (Arabidopsis thaliana) AED:0.05 eAED:0.05 QI:76 1 1 1 1 4 235 515)'               |
| <b>protein biosynthesis.ribosome biogenesis.large ribosomal subunit (LSU).LSU proteome.component RpL3'</b> | xvis03_2165<br>31-pa | component RPL3 of LSU proteome component (original description: augustus-gene-9.118-mRNA-1 protein Name:Similar to RPL3 60S ribosomal protein L3 (Oryza sativa subsp. japonica) AED:0.07 eAED:0.07 QI:0 1 0.83 1 1 0.83 6 237 407)' |
| <b>protein biosynthesis.ribosome biogenesis.large ribosomal subunit (LSU).LSU proteome.component RpL3'</b> | xvis03_2208<br>63-pa | component RPL3 of LSU proteome component (original description: processed-gene-0.82-mRNA-1 protein Name:Similar to RPL3 60S ribosomal protein L3 (Oryza sativa subsp. japonica) AED:0.08 eAED:0.08 QI:54 1 1 1 1 6 258 389)'        |

|                                                                                                             |                      |                                                                                                                                                                                                                     |
|-------------------------------------------------------------------------------------------------------------|----------------------|---------------------------------------------------------------------------------------------------------------------------------------------------------------------------------------------------------------------|
| <b>protein</b> biosynthesis.ribosome biogenesis.large ribosomal subunit (LSU).LSU proteome.component RpL8'  | xvis03_2158<br>83-pa | component RPL8 of LSU proteome component (original description: processed-gene-4.2-mRNA-1 protein Name:Similar to RPL8 60S ribosomal protein L8 (Solanum lycopersicum) AED:0.00 eAED:0.00 QI:71 1 1 1 1 2 167 261)' |
| <b>protein</b> biosynthesis.ribosome biogenesis.small ribosomal subunit (SSU).SSU proteome.component RpS2'  | xvis03_2209<br>73-pa | component RPS2 of SSU proteome (original description: augustus-gene-5.51-mRNA-1 protein Name:Similar to RPS2C 40S ribosomal protein S2-3 (Arabidopsis thaliana) AED:0.29 eAED:0.29 QI:54 1 1 1 0.5 0.33 3 154 274)' |
| <b>protein</b> biosynthesis.ribosome biogenesis.small ribosomal subunit (SSU).SSU proteome.component RpS17' | xvis03_2047<br>05-pa | component RPS17 of SSU proteome (original description: processed-gene-11.1-mRNA-1 protein Name:Similar to RPS17 40S ribosomal protein S17 (Solanum lycopersicum) AED:0.06                                           |

|                                                                                                             |                      |                                                                                                                                                                                                    |
|-------------------------------------------------------------------------------------------------------------|----------------------|----------------------------------------------------------------------------------------------------------------------------------------------------------------------------------------------------|
|                                                                                                             |                      | eAED:0.06 QI:0 -1 0 1 -1 1 1 0 143)'                                                                                                                                                               |
| <b>protein</b> biosynthesis.ribosome biogenesis.small ribosomal subunit (SSU).SSU proteome.component RpS17' | xvis03_2078<br>25-pa | component RPS17 of SSU proteome (original description: processed-gene-26.31-mRNA-1 protein Name:Similar to RPS17 40S ribosomal protein S17 (Solanum lycopersicum) AED:0.03 eAED:0.03 QI:0 -1 0 1 - |



|                                                                                                                           |                      |                                                                                                                                                                                                                                                          |
|---------------------------------------------------------------------------------------------------------------------------|----------------------|----------------------------------------------------------------------------------------------------------------------------------------------------------------------------------------------------------------------------------------------------------|
|                                                                                                                           |                      | 1 1 1 0 146)'                                                                                                                                                                                                                                            |
| <b>protein biosynthesis.organelle machinery.plastidial ribosome.large ribosomal subunit</b><br>proteome.component psRpL4' | xvis03_2136<br>52-pa | component psRPL4 of large ribosomal subunit proteome (original description: processed-gene-16.266-mRNA-1 protein Name:Similar to RPL4 50S ribosomal protein L4, chloroplastic (Nicotiana tabacum) AED:0.18 eAED:0.18 QI:0 -1 0 1 -1 1 1 0 272)'          |
| <b>protein biosynthesis.organelle machinery.plastidial ribosome.large ribosomal subunit</b><br>proteome.component psRpL5' | xvis03_2201<br>12-pa | component psRPL5 of large ribosomal subunit proteome (original description: augustus-gene-8.33-mRNA-1 protein Name:Similar to RPL5 50S ribosomal protein L5, chloroplastic (Arabidopsis thaliana) AED:0.02 eAED:0.03 QI:29 0.5 0.33 1 1 1 3 0 284)'      |
| <b>protein biosynthesis.organelle machinery.plastidial ribosome.large ribosomal subunit</b><br>proteome.component psRpL9' | xvis03_2020<br>61-pa | component psRPL9 of large ribosomal subunit proteome (original description: processed-gene-6.69-mRNA-1 protein Name:Similar to RPL9 50S ribosomal protein L9, chloroplastic (Arabidopsis thaliana) AED:0.06 eAED:0.06 QI:100 1 1 1 0.83 0.71 7 568 196)' |
| <b>protein biosynthesis.organelle machinery.plastidial ribosome.small ribosomal subunit</b><br>proteome.component psRpS5' | xvis03_2073<br>37-pa | component psRPS5 of small ribosomal subunit proteome (original description: processed-gene-10.83-mRNA-1 protein Name:Similar to rps5 30S ribosomal protein S5, chloroplastic (Arabidopsis thaliana) AED:0.00 eAED:0.00 QI:186 1 1 1 1 1 2 216 309)'      |

|                                                                                                  |                      |                                                                                                                                                                                                                                                  |
|--------------------------------------------------------------------------------------------------|----------------------|--------------------------------------------------------------------------------------------------------------------------------------------------------------------------------------------------------------------------------------------------|
| <b>protein biosynthesis.organelle machinery.translation initiation.initiation factor (IF-3)'</b> | xvis03_2242<br>54-pa | IF-3 translation initiation factor (original description: augustus-gene-0.0-mRNA-1 protein Name:Similar to infC Translation initiation factor IF-3 (Nostoc sp. (strain PCC 7120 / UTEX 2576)) AED:0.11 eAED:0.11 QI:31 1 1 0.55 0.5 10 360 276)' |
|--------------------------------------------------------------------------------------------------|----------------------|--------------------------------------------------------------------------------------------------------------------------------------------------------------------------------------------------------------------------------------------------|

|                                                                                                                                                                     |                      |                                                                                                                                                                                                                            |
|---------------------------------------------------------------------------------------------------------------------------------------------------------------------|----------------------|----------------------------------------------------------------------------------------------------------------------------------------------------------------------------------------------------------------------------|
| <b>protein homeostasis.protein quality control.ER Quality Control (ERQC) machinery.calnexin/calreticulin chaperone system.CNX-CRT cycle.lectin chaperone (CNX)'</b> | xvis03_2191<br>78-pa | lectin chaperone (CNX) (original description: processed-gene-7.19-mRNA-1 protein Name:Similar to CNX1 Calnexin homolog 1 (Arabidopsis thaliana) AED:0.09 eAED:0.09 QI:144 1 1 0.83 0.71 7 378 540)'                        |
| <b>protein homeostasis.protein quality control.Hsp60 chaperone system.Hsp60-co-chaperone (Hsp20)'</b>                                                               | xvis03_2069<br>91-pa | Hsp60-co-chaperone (Hsp20) (original description: augustus-gene-10.52-mRNA-1 protein Name:Similar to CPN21 20 kDa chaperonin, chloroplastic (Arabidopsis thaliana) AED:0.07 eAED:0.07 QI:99 1 1 1 1 5 439 254)'            |
| <b>protein homeostasis.protein quality control.Hsp60 chaperone system.Hsp60-co-chaperone (Hsp20)'</b>                                                               | xvis03_2170<br>41-pa | Hsp60-co-chaperone (Hsp20) (original description: augustus-gene-12.20-mRNA-1 protein Name:Similar to CPN21 20 kDa chaperonin, chloroplastic (Arabidopsis thaliana) AED:0.12 eAED:0.12 QI:32 0.33 0.71 0.71 1 1 7 174 298)' |

|                                                                                                                                                    |                      |                                                                                                                                                                                                                                                                 |
|----------------------------------------------------------------------------------------------------------------------------------------------------|----------------------|-----------------------------------------------------------------------------------------------------------------------------------------------------------------------------------------------------------------------------------------------------------------|
| <b>protein</b> <b>homeostasis.ubiquitin-proteasome</b><br>system.26S proteasome.20S core particle.alpha-type<br>components.component alpha type-2' | xvis03_2139<br>88-pa | component alpha type-2 of 26S<br>proteasome (original description:<br>augustus-gene-11.18-mRNA-1<br>protein Name:Similar to PAB1<br>Proteasome subunit alpha type-2<br>(Oryza sativa subsp. japonica)<br>AED:0.05      eAED:0.05<br>QI:70 1 1 1 1 10 615 222)'  |
| <b>protein</b> <b>homeostasis.ubiquitin-proteasome</b><br>system.26S proteasome.20S core particle.beta-type<br>components.component beta type-7'   | xvis03_2023<br>56-pa | component beta type-7 of 26S<br>proteasome (original description:<br>processed-gene-29.12-mRNA-1<br>protein Name:Similar to PBG1<br>Proteasome subunit beta type-4<br>(Arabidopsis thaliana) AED:0.13<br>eAED:0.13<br>QI:0 0.71 0.75 0.87 1 1 8 335 329)'       |
| <b>protein</b> <b>homeostasis.proteolysis.cysteine-type</b><br>peptidase activities.C13-class asparaginyl<br>endopeptidase (Legumain)'             | xvis03_2112<br>68-pa | asparaginyl      endopeptidase<br>(Legumain) (original description:<br>processed-gene-9.25-mRNA-1<br>protein Name:Similar to Vacuolar-<br>processing enzyme (Citrus<br>sinensis) AED:0.07      eAED:0.07<br>QI:3 1 1 1 1 1 9 417 590)'                          |
| <b>Carbohydrate</b> <b>metabolism.sucrose</b><br>metabolism.biosynthesis.cytosolic triose-phosphate<br>isomerase'                                  | xvis03_2117<br>45-pa | cytosolic      triose-phosphate<br>isomerase (original description:<br>augustus-gene-13.21-mRNA-1<br>protein Name:Similar to TPIP1<br>Triosephosphate isomerase,<br>cytosolic (Petunia hybrida)<br>AED:0.34      eAED:0.34<br>QI:46 0.88 0.8 0.9 1 1 10 0 326)' |

|                                                                                                        |                      |                                                                                                                                                                                                                                                                         |
|--------------------------------------------------------------------------------------------------------|----------------------|-------------------------------------------------------------------------------------------------------------------------------------------------------------------------------------------------------------------------------------------------------------------------|
| <b>Carbohydrate metabolism.</b> starch metabolism.biosynthesis.ADp-glucose pyrophosphorylase'          | xvis03_2209<br>98-pa | ADP-glucose pyrophosphorylase (original description: augustus-gene-7.121-mRNA-1 protein Name:Similar to ADG2 Glucose-1-phosphate adenylyltransferase large subunit 1, chloroplastic (Arabidopsis thaliana) AED:0.11 eAED:0.11 QI:196 0.92 0.86 1 0.85 0.86 15 136 540)' |
| <b>Carbohydrate metabolism.</b> oxidative pentose phosphate pathway.non-oxidative phase.transketolase' | xvis03_2077<br>74-pa | transketolase (original description: processed-gene-21.50-mRNA-1 protein Name:Similar to Transketolase, chloroplastic (Solanum tuberosum) AED:0.17 eAED:0.17 QI:154 0.85 0.75 1 1 1 8 0 716)'                                                                           |
| <b>Carbohydrate metabolism.</b> oxidative pentose phosphate pathway.non-oxidative phase.transketolase' | xvis03_2190<br>01-pa | transketolase (original description: processed-gene-2.79-mRNA-1 protein Name:Similar to Transketolase, chloroplastic (Solanum tuberosum) AED:0.04 eAED:0.04 QI:238 1 1 1 1 1 7 473 742)'                                                                                |
| <b>Carbohydrate metabolism.</b> plastidial glycolysis.triosephosphate isomerase'                       | xvis03_2242<br>25-pa | triosephosphate isomerase (original description: augustus-gene-0.55-mRNA-1 protein Name:Similar to TPIP1 Triosephosphate isomerase, chloroplastic (Spinacia oleracea) AED:0.32 eAED:0.32 QI:0 0 0 0.55 0.87 1 9 0 311)'                                                 |
| <b>Cellular respiration.</b> glycolysis.cytosolic glycolysis.triosephosphate isomerase'                | xvis03_2117<br>45-pa | triosephosphate isomerase (original description: augustus-gene-13.21-mRNA-1 protein Name:Similar to TPIP1 Triosephosphate isomerase, cytosolic (Petunia hybrida) AED:0.34 eAED:0.34 QI:46 0.88 0.8 0.9 1 1 10 0 326)'                                                   |

|                                                                                                    |                      |                                                                                                                                                                                                                                                           |
|----------------------------------------------------------------------------------------------------|----------------------|-----------------------------------------------------------------------------------------------------------------------------------------------------------------------------------------------------------------------------------------------------------|
| <b>Cellular respiration.glycolysis.methylglyoxal degradation.lactoyl-glutathione lyase (GLX1)'</b> | xvis03_2105<br>97-pa | lactoyl-glutathione lyase (GLX1)<br>(original description: augustus-gene-8.18-mRNA-1 protein<br>Name:Similar to At1g67280<br>Probable lactoylglutathione lyase,<br>chloroplast (Arabidopsis thaliana)<br>AED:0.06 eAED:0.06<br>QI:224 1 1 1 1 9 419 372)' |
| <b>Cellular respiration.tricarboxylic acid cycle.mitochondrial NAD-dependent malic enzyme'</b>     | xvis03_2015<br>88-pa | mitochondrial NAD-dependent<br>malic enzyme (original description:<br>augustus-gene-28.7-mRNA-1<br>protein Name:Similar to NAD-<br>ME1 NAD-dependent malic<br>enzyme 1, mitochondrial<br>(Arabidopsis thaliana) AED:0.22<br>eAED:0.22                     |

|                                                                                                               |                      |                                                                                                                                                                                                                                                                                     |
|---------------------------------------------------------------------------------------------------------------|----------------------|-------------------------------------------------------------------------------------------------------------------------------------------------------------------------------------------------------------------------------------------------------------------------------------|
|                                                                                                               |                      | QI:0 0.77 0.78 0.86 0.77 0.82 23 29<br>0 790)'                                                                                                                                                                                                                                      |
| <b>Cellular respiration.oxidative phosphorylation.cytochrome c reductase complex.component cytochrome c1'</b> | xvis03_2062<br>81-pa | cytochrome c1 component of<br>cytochrome c reductase complex<br>(original description: augustus-gene-15.74-mRNA-1 protein<br>Name:Similar to CYCL<br>Cytochrome c1-1, heme protein,<br>mitochondrial (Solanum<br>tuberosum) AED:0.28 eAED:0.28<br>QI:33 0.85 0.87 1 1 1 8 457 361)' |

|                                                                                                                       |                      |                                                                                                                                                                                                                                                        |
|-----------------------------------------------------------------------------------------------------------------------|----------------------|--------------------------------------------------------------------------------------------------------------------------------------------------------------------------------------------------------------------------------------------------------|
| <b>Cellular respiration.</b> oxidative phosphorylation.ATP synthase complex.peripheral MF1 subcomplex.subunit delta_' | xvis03_2187<br>22-pa | subunit delta_ of ATP synthase peripheral MF1 subcomplex (original description: augustus-gene-3.37-mRNA-1 protein Name:Similar to ATP synthase subunit delta', mitochondrial (Ipomoea batatas) AED:0.20 eAED:0.20 QI:67 0 0.25 0.5 0.33 0.75 4 0 208)' |
| <b>Redox homeostasis.</b> enzymatic reactive oxygen species scavengers.catalase'                                      | xvis03_2207<br>33-pa | catalase (original description: processed-gene-1.13-mRNA-1 protein Name:Similar to CAT1 Catalase-1 (Triticum aestivum) AED:0.19 eAED:0.19 QI:0 0 0 0.66 1 1 9 0 623)'                                                                                  |
| <b>Redox homeostasis.</b> hydrogen peroxide removal.ascorbate-glutathione cycle.ascorbate peroxidase (ApX)'           | xvis03_2018<br>83-pa | ascorbate peroxidase (APX) (original description: augustus-gene-50.73-mRNA-1 protein Name:Similar to APX1 L-ascorbate peroxidase, cytosolic (Pisum sativum) AED:0.15 eAED:0.15 QI:0 0.85 0.75 1 1 0.87 8 414 307)'                                     |
| <b>Redox homeostasis.</b> hydrogen peroxide removal.ascorbate-glutathione cycle.ascorbate peroxidase (ApX)'           | xvis03_2142<br>14-pa | ascorbate peroxidase (APX) (original description: processed-gene-11.33-mRNA-1 protein Name:Similar to APX1 L-ascorbate peroxidase, cytosolic (Pisum sativum) AED:0.17 eAED:0.17 QI:131 1 1 1 1 1 7 558 249)'                                           |
| <b>Redox homeostasis.</b> hydrogen peroxide removal.ascorbate-glutathione cycle.ascorbate peroxidase (ApX)'           | xvis03_2221<br>05-pa | ascorbate peroxidase (APX) (original description: augustus-gene-5.53-mRNA-1 protein Name:Similar to APXT L-ascorbate peroxidase T, chloroplastic (Arabidopsis thaliana) AED:0.32 eAED:0.32 QI:0 0.5 0.45 0.72 0.9 0.81 11 0 364)'                      |

|                                                                                                                                                                                                       |                      |                                                                                                                                                                                                                                                                                                                                               |
|-------------------------------------------------------------------------------------------------------------------------------------------------------------------------------------------------------|----------------------|-----------------------------------------------------------------------------------------------------------------------------------------------------------------------------------------------------------------------------------------------------------------------------------------------------------------------------------------------|
| <b>Redox homeostasis.</b> hydrogen peroxide removal.ascorbate-glutathione cycle.ascorbate peroxidase (ApX)'                                                                                           | xvis03_2234<br>38-pa | ascorbate peroxidase (APX) (original description: augustus-gene-1.2-mRNA-1 protein Name:Similar to APX4 Probable L-ascorbate peroxidase 4 (Oryza sativa subsp. japonica) AED:0.10 eAED:0.10 QI:188 1 1 1 1 9 226 284)'                                                                                                                        |
| <b>Amino acid metabolism.</b> biosynthesis.aspartate family.aspartate-derived amino acids.methionine.salvage pathway.bifunctional methylthioribulose-1-phosphate dehydratase and enolase-phosphatase' | xvis03_2235<br>88-pa | bifunctional methylthioribulose-1-phosphate dehydratase and enolase-phosphatase (original description: processed-gene-1.56-mRNA-1 protein Name:Similar to VIT_19s0014g02480 Probable bifunctional methylthioribulose-1-phosphate dehydratase/enolase-phosphatase E1 1 (Vitis vinifera) AED:0.24 eAED:0.24 QI:0 0.9 0.90 0.90 1 1 11 237 411)' |
| <b>Amino acid metabolism.</b> biosynthesis.serine family.glycine.serine hydroxymethyltransferase                                                                                                      | xvis03_2080<br>40-pa | serine hydroxymethyltransferase (original description: processed-gene-21.10-mRNA-1 protein Name:Similar to SHM4 Serine hydroxymethyltransferase 4 (Arabidopsis thaliana) AED:0.05 eAED:0.05 QI:76 1 1 1 1 4 235 515)'                                                                                                                         |
| <b>Nucleotide metabolism.</b> purines.phosphotransfers.adenylate kinase'                                                                                                                              | xvis03_2073<br>11-pa | adenylate kinase (original description: processed-gene-7.62-mRNA-1 protein Name:Similar to ADK-B Adenylate kinase 4 (Oryza sativa subsp. japonica) AED:0.05 eAED:0.05 QI:122 1 1 1 1 6 379 246)'                                                                                                                                              |

|                                                                                                                                                               |                      |                                                                                                                                                                                                                                                                                  |
|---------------------------------------------------------------------------------------------------------------------------------------------------------------|----------------------|----------------------------------------------------------------------------------------------------------------------------------------------------------------------------------------------------------------------------------------------------------------------------------|
| <b>Nucleotide metabolism.purines.phosphotransfers.adenylate kinase'</b>                                                                                       | xvis03_2136<br>05-pa | adenylate kinase (original description: processed-gene-14.84-mRNA-1 protein Name:Similar to Os08g0288200 Probable adenylate kinase 5, chloroplastic (Oryza sativa subsp. japonica) AED:0.22 eAED:0.22 QI:25 1 0.94 1 1 1 17 0 611)'                                              |
| <b>RNA processing.pre-mRNA splicing. U2-type-intron-specific major spliceosome. U2 small nuclear ribonucleoprotein particle (snRNp).protein factor (U2A)'</b> | xvis03_2056<br>05-pa | protein factor U2A of U2 small nuclear ribonucleoprotein particle (snRNP) (original description: processed-gene-17.119-mRNA-1 protein Name:Similar to At1g09760 U2 small nuclear ribonucleoprotein A' (Arabidopsis thaliana) AED:0.23 eAED:0.27 QI:0 0.83 0.71 1 1 1 7 448 347)' |
| <b>RNA processing.organelle machinery.ribonuclease activities.endoribonuclease (CSp41)'</b>                                                                   | xvis03_2132<br>17-pa | endoribonuclease (CSP41) (original description: augustus-gene-16.1-mRNA-1 protein Name:Similar to CSP41A Chloroplast stem-loop binding protein of 41 kDa a, chloroplastic (Arabidopsis thaliana) AED:0.01 eAED:0.01                                                              |

|                                                                              |                      |                                                                                                                                                                                                                                            |
|------------------------------------------------------------------------------|----------------------|--------------------------------------------------------------------------------------------------------------------------------------------------------------------------------------------------------------------------------------------|
| <b>protein modification.protein folding.protein folding catalyst (FKBP)'</b> | xvis03_2086<br>52-pa | protein folding catalyst (FKBP) (original description: processed-gene-19.48-mRNA-1 protein Name:Similar to FKBP62 Peptidyl-prolyl cis-trans isomerase FKBP62 (Arabidopsis thaliana) AED:0.12 eAED:0.12 QI:105 0.91 0.92 1 1 1 13 323 570)' |
|------------------------------------------------------------------------------|----------------------|--------------------------------------------------------------------------------------------------------------------------------------------------------------------------------------------------------------------------------------------|



|                                                                                                                    |                      |                                                                                                                                                                                                                                                                             |
|--------------------------------------------------------------------------------------------------------------------|----------------------|-----------------------------------------------------------------------------------------------------------------------------------------------------------------------------------------------------------------------------------------------------------------------------|
| <b>protein modification.</b> protein folding.protein folding catalyst (FKBP)'                                      | xvis03_2248<br>49-pa | protein folding catalyst (FKBP)<br>(original description: processed-gene-1.76-mRNA-1 protein<br>Name:Similar to FKBP19 Peptidyl-prolyl cis-trans isomerase FKBP19, chloroplastic (Arabidopsis thaliana)<br>AED:0.46 eAED:0.49<br>QI:0 0.72 0.83 0.91 0.90 0.83 12 203 320)' |
| <b>Cell wall organisation.</b> pectin.rhamnogalacturonan I.modification and degradation.beta-galactosidase (BGAL)' | xvis03_2089<br>87-pa | beta-galactosidase (BGAL) (original description: augustus-gene-4.4-mRNA-1 protein Name:Similar to BGAL9 Beta-galactosidase 9 (Arabidopsis thaliana)<br>AED:0.06 eAED:0.06<br>QI:63 1 1 1 0.94 0.94 19 309 904)'                                                             |
| <b>Cell wall organisation.</b> pectin.rhamnogalacturonan I.modification and degradation.beta-galactosidase (BGAL)' | xvis03_2214<br>34-pa | beta-galactosidase (BGAL) (original description: processed-gene-2.106-mRNA-1 protein<br>Name:Similar to Beta-galactosidase (Asparagus officinalis)<br>AED:0.13 eAED:0.13<br>QI:277 1 1 1 1 1 19 418 832)'                                                                   |

**Table S14:** List of the Bin names, id and

description of the upregulated proteins at LRD

| BinName                                                                                                      | id               | Description                                                                                                                                                                                                                 |
|--------------------------------------------------------------------------------------------------------------|------------------|-----------------------------------------------------------------------------------------------------------------------------------------------------------------------------------------------------------------------------|
| <b>protein biosynthesis.</b> ribosome biogenesis.large ribosomal subunit (LSU).LSU proteome.component RpL23' | xvis03_202929-pa | component RPL23 of LSU proteome component (original description: augustus-gene-26.5-mRNA-1 protein Name:Similar to RPL23A 60S ribosomal protein L23 (Arabidopsis thaliana) AED:0.39 eAED:0.40<br>QI:0 0 0 0.5 1 1 6 0 279)' |
| <b>protein biosynthesis.</b> ribosome biogenesis.small ribosomal subunit (SSU).SSU proteome.component RpS12' | xvis03_210337-pa | component RPS12 of SSU proteome (original description: augustus-gene-8.1-mRNA-1 protein Name:Similar to RPS12 40S ribosomal protein S12 (Hordeum vulgare) AED:0.38 eAED:0.38<br>QI:0 1 0.75 1 1 1 4 393 161)'               |

|                                                                                                                                          |                  |                                                                                                                                                                                                                                      |
|------------------------------------------------------------------------------------------------------------------------------------------|------------------|--------------------------------------------------------------------------------------------------------------------------------------------------------------------------------------------------------------------------------------|
| <b>protein</b> biosynthesis.ribosome biogenesis.small ribosomal subunit (SSU).SSU proteome.component RpS12'                              | xvis03_221354-pa | component RPS12 of SSU proteome (original description: augustus-gene-2.78-mRNA-1 protein Name:Similar to RPS12 40S ribosomal protein S12 (Hordeum vulgare) AED:0.26 eAED:0.26 QI:0 1 0.75 1 1 4 274 184)'                            |
| <b>protein</b> biosynthesis.ribosome biogenesis.small ribosomal subunit (SSU).SSU proteome.component RpS27'                              | xvis03_205594-pa | component RPS27 of SSU proteome (original description: augustus-gene-17.68-mRNA-1 protein Name:Similar to RPS27B 40S ribosomal protein S27-2 (Arabidopsis thaliana) AED:0.09 eAED:0.09 QI:0 1 0.75 1 1 4 342 163)'                   |
| <b>protein</b> biosynthesis.ribosome biogenesis.small ribosomal subunit (SSU).SSU proteome.component RpS27'                              | xvis03_209876-pa | component RPS27 of SSU proteome (original description: augustus-gene-14.5-mRNA-1 protein Name:Similar to RPS27B 40S ribosomal protein S27-2 (Arabidopsis thaliana) AED:0.17 eAED:0.17 QI:86 1 1 0.66 0.75 4 47 86)'                  |
| <b>protein</b> biosynthesis.mRNA quality control.NMD Nonsense-Mediated Decay.eRF1-eRF3 aberrant mRNA detection complex.component eRF1'   | xvis03_209643-pa | eRF1 peptide release factor (original description: processed-gene-16.29-mRNA-1 protein Name:Similar to ERF1-3 Eukaryotic peptide chain release factor subunit 1-3 (Arabidopsis thaliana) AED:0.00 eAED:0.00 QI:0 -1 0 1 -1 1 0 437)' |
| <b>protein</b> biosynthesis.translation initiation.pre-Initiation Complex (pIC) module.eIF3 mRNA-to-pIC binding complex.component eIF3g' | xvis03_223860-pa | component eIF3g of eIF3 mRNA-to-PIC binding complex (original description: processed-gene-2.57-mRNA-1 protein Name:Similar to v1g171563 Eukaryotic translation initiation factor 3 subunit G (Nematostella vectensis) AED:0.02       |

|                                                                                                                                                               |                  |                                                                                                                                                                                                                                                         |
|---------------------------------------------------------------------------------------------------------------------------------------------------------------|------------------|---------------------------------------------------------------------------------------------------------------------------------------------------------------------------------------------------------------------------------------------------------|
|                                                                                                                                                               |                  | eAED:0.02<br>QI:0 1 0.5 1 1 2 3401 289)'                                                                                                                                                                                                                |
| <b>protein biosynthesis.translation initiation.mRNA loading.mRNA poly-A-tail binding factor (pABp)'</b>                                                       | xvis03_217585-pa | mRNA poly-A-tail binding factor (PABP) (original description: augustus-gene-6.44-mRNA-1 protein Name:Similar to PAB8 Polyadenylate-binding protein 8 (Arabidopsis thaliana) AED:0.09 eAED:0.09<br>QI:312 0.75 0.66 1 1 1 9 460 634)'                    |
| <b>protein biosynthesis.translation elongation.eEF1 aminoacyl-tRNA binding factor activity.eEF1B eEF1A-GDp-recycling complex.component eEF1B-beta/-delta'</b> | xvis03_202784-pa | component eEF1B-beta/-delta of eEF1B eEF1A-GDP-recycling complex (original description: processed-gene-9.6-mRNA-1 protein Name:Similar to At5g12110 Elongation factor 1-beta 1 (Arabidopsis thaliana) AED:0.07 eAED:0.07<br>QI:28 1 1 1 1 1 6 211 226)' |
| <b>protein biosynthesis.translation elongation.eEF5 poly-p/G elongation factor activity.poly-p/G elongation factor (eEF5/eIF5A)'</b>                          | xvis03_208182-pa | poly-P/G elongation factor (eEF5/eIF5A) (original description: processed-gene-16.15-mRNA-1 protein Name:Similar to EIF-5A2 Eukaryotic translation initiation factor 5A-2 (Nicotiana glauca) AED:0.11 eAED:0.11<br>QI:80 1 1 1 0.8 0.66 6 225 159)'      |
| <b>protein biosynthesis.translation elongation.eEF5 poly-p/G elongation factor activity.poly-p/G elongation factor (eEF5/eIF5A)'</b>                          | xvis03_214372-pa | poly-P/G elongation factor (eEF5/eIF5A) (original description: processed-gene-6.62-mRNA-1 protein Name:Similar to Eukaryotic translation initiation factor 5A (Manihot esculenta) AED:0.20 eAED:0.20<br>QI:188 1 1 1 0.8 0.66 6 353 159)'               |

|                                                                                                                                                                             |                  |                                                                                                                                                                                                                                                                            |
|-----------------------------------------------------------------------------------------------------------------------------------------------------------------------------|------------------|----------------------------------------------------------------------------------------------------------------------------------------------------------------------------------------------------------------------------------------------------------------------------|
| <b>protein biosynthesis</b> .translation elongation.eEF5 poly-p/G elongation factor activity.poly-p/G elongation factor (eEF5/eIF5A)'                                       | xvis03_221720-pa | poly-P/G elongation factor (eEF5/eIF5A) (original description: augustus-gene-5.43-mRNA-1 protein Name:Similar to EIF-5A2 Eukaryotic translation initiation factor 5A-2 (Nicotiana plumbaginifolia) AED:0.05 eAED:0.05 QI:177 1 1 0.8 0.66 6 330 160)'                      |
| <b>protein biosynthesis</b> .organelle machinery.plastidial ribosome.large ribosomal subunit proteome.component psRpL18'                                                    | xvis03_224660-pa | component psRPL18 of large ribosomal subunit proteome (original description: processed-gene-1.62-mRNA-1 protein Name:Similar to FEN1 Flap endonuclease 1 (Zea mays) AED:0.25 eAED:0.26 QI:20 0.7 0.71 0.95 1 1 21 362 621)'                                                |
| <b>protein biosynthesis</b> .organelle machinery.translation elongation.elongation factor (EF-Tu)'                                                                          | xvis03_212520-pa | EF-Tu translation elongation factor (original description: augustus-gene-6.14-mRNA-1 protein Name:Similar to TUFb1 Elongation factor Tu, chloroplastic (Glycine max) AED:0.04 eAED:0.16 QI:0 0 0.5 1 1 1 2 351 455)'                                                       |
| <b>Coenzyme metabolism</b> .iron-sulfur cluster assembly machinery.plastidial SUF system.assembly phase.SUF-SE sulfur transfer complex.cysteine desulfurase component NFS2' | xvis03_220549-pa | cysteine desulfurase component NFS2 of plastidial SUF system assembly phase (original description: processed-gene-6.81-mRNA-1 protein Name:Similar to NFS2 Cysteine desulfurase 1, chloroplastic (Arabidopsis thaliana) AED:0.13 eAED:0.23 QI:55 0.77 0.8 1 1 1 10 0 498)' |
| <b>Coenzyme metabolism</b> .iron-sulfur cluster assembly machinery.mitochondrial ISC system.transfer phase.assembly factor (IBA57)'                                         | xvis03_224887-pa | assembly factor BA57 of mitochondrial ISC system transfer phase (original description: augustus-gene-0.36-mRNA-1 protein Name:Similar to At4g12130 Putative transferase At4g12130,                                                                                         |

|                                                                                                                                                                            |                  |                                                                                                                                                                                                                                                                    |
|----------------------------------------------------------------------------------------------------------------------------------------------------------------------------|------------------|--------------------------------------------------------------------------------------------------------------------------------------------------------------------------------------------------------------------------------------------------------------------|
|                                                                                                                                                                            |                  | mitochondrial (Arabidopsis thaliana) AED:0.05 eAED:0.05 QI:50 1 1 1 1 5 427 411'                                                                                                                                                                                   |
| <b>Coenzyme</b> <b>metabolism.tetrapyrrol</b> biosynthesis.5-aminolevulinic acid formation.glutamate-1-semialdehyde-2,1-aminomutase'                                       | xvis03_216135-pa | glutamate-1-semialdehyde-2,1-aminomutase (original description: augustus-gene-2.5-mRNA-1 protein Name:Similar to GSA Glutamate-1-semialdehyde 2,1-aminomutase, chloroplastic (Oryza sativa subsp. japonica) AED:0.00 eAED:0.00 QI:90 1 1 1 1 3 296 478)'           |
| <b>Coenzyme</b> <b>metabolism.tetrapyrrol</b> biosynthesis.chlorophyll metabolism.magnesium-chelatase complex.component CHL-I'                                             | xvis03_222911-pa | component CHL-I of magnesium-chelatase complex (original description: processed-gene-1.35-mRNA-1 protein Name:Similar to CHLI Magnesium-chelatase subunit ChII, chloroplastic (Oryza sativa subsp. japonica) AED:0.00 eAED:0.00 QI:218 1 1 1 1 3 269 418)'         |
| <b>Coenzyme</b> <b>metabolism.tetrapyrrol</b> biosynthesis.chlorophyll metabolism.protochlorophyllide oxidoreductase (pOR) activities.light-dependent pOR'                 | xvis03_212894-pa | light-dependent protochlorophyllide oxidoreductase (original description: augustus-gene-2.1-mRNA-1 protein Name:Similar to PORB Protochlorophyllide reductase B, chloroplastic (Hordeum vulgare) AED:0.09 eAED:0.09 QI:162 1 1 1 1 5 457 393)'                     |
| <b>photosynthesis</b> .photophosphorylation.chlororespiration. NADH dehydrogenase-like (NDH) complex.assembly and stabilization.Cpn60 chaperonin heterodimer.subunit beta' | xvis03_205691-pa | subunit beta of Cpn60 chaperonin complex (original description: processed-gene-31.124-mRNA-1 protein Name:Similar to RuBisCO large subunit-binding protein subunit beta, chloroplastic (Pisum sativum) AED:0.20 eAED:0.20 QI:97 0.8 0.81 0.87 0.93 0.87 16 0 678)' |

|                                                                                                                                                                          |                  |                                                                                                                                                                                                                                                                                         |
|--------------------------------------------------------------------------------------------------------------------------------------------------------------------------|------------------|-----------------------------------------------------------------------------------------------------------------------------------------------------------------------------------------------------------------------------------------------------------------------------------------|
| <b>photosynthesis.calvin cycle.ribulose-1,5-bisphosphat carboxylase/oxygenase (RuBisCo) activity.RuBisCo heterodimer.small subunit'</b>                                  | xvis03_223144-pa | small subunit of ribulose-1,5-bisphosphat carboxylase/oxygenase heterodimer (original description: processed-gene-3.56-mRNA-1 protein Name:Similar to RBCS1 Ribulose bisphosphate carboxylase small chain, chloroplastic (Musa acuminata) AED:0.05 eAED:0.05 QI:145 1 1 1 1 3 356 174)' |
| <b>photosynthesis.calvin cycle.ribulose-1,5-bisphosphat carboxylase/oxygenase (RuBisCo) activity.RuBisCo assembly.CpN60 assembly chaperone complex.component CpN60b'</b> | xvis03_205691-pa | component CPN60b of CPN60 assembly chaperone complex (original description: processed-gene-31.124-mRNA-1 protein Name:Similar to RuBisCO large subunit-binding protein subunit beta, chloroplastic (Pisum sativum) AED:0.20 eAED:0.20 QI:97 0.8 0.81 0.87 0.93 0.87 16 0 678)'          |
| <b>photosynthesis.calvin cycle.phosphoglycerate kinase'</b>                                                                                                              | xvis03_201416-pa | phosphoglycerate kinase (original description: processed-gene-12.20-mRNA-1 protein Name:Similar to Phosphoglycerate kinase, chloroplastic (Nicotiana tabacum) AED:0.04 eAED:0.04 QI:190 1 1 1 1 1 6 289 477)'                                                                           |
| <b>photosynthesis.photorespiration.glycine decarboxylase complex.lipoamide-containing component H-protein'</b>                                                           | xvis03_220076-pa | lipoamide-containing component H-protein of glycine cleavage system (original description: augustus-gene-4.88-mRNA-1 protein Name:Similar to GDCSH Glycine cleavage system H protein, mitochondrial (Oryza sativa subsp. japonica) AED:0.04 eAED:0.04 QI:127 1 1 1 1 1 4 484 165)'      |
| <b>Cellular respiration.glycolysis.cytosolic glycolysis. Phosphoglycerate kinase'</b>                                                                                    | xvis03_201416-pa | phosphoglycerate kinase (original description: processed-gene-12.20-mRNA-1 protein Name:Similar to Phosphoglycerate kinase, chloroplastic (Nicotiana tabacum)                                                                                                                           |

|                                                                                                                  |                  |                                                                                                                                                                                                                                                              |
|------------------------------------------------------------------------------------------------------------------|------------------|--------------------------------------------------------------------------------------------------------------------------------------------------------------------------------------------------------------------------------------------------------------|
|                                                                                                                  |                  | AED:0.04 eAED:0.04<br>QI:190 1 1 1 1 6 289 477)'<br>0.4267875                                                                                                                                                                                                |
| <b>Cellular respiration.glycolysis.methylglyoxal degradation. Hydroxy-acyl-glutathione hydrolase (GLX2)'</b>     | xvis03_211424-pa | hydroxy-acyl-glutathione hydrolase (GLX2) (original description: augustus-gene-2.30-mRNA-1 protein Name:Similar to GLX2-2 Hydroxyacylglutathione hydrolase cytoplasmic (Arabidopsis thaliana) AED:0.23 eAED:0.23 QI:367 1 1 1 1 0.83 6 257 190)'<br>1.663941 |
| <b>protein modification.phosphorylation CAMK protein kinase superfamily.SNF1-related protein kinase (SnRK2)'</b> | xvis03_216515-pa | SNF1-related protein kinase (SnRK2) (original description: augustus-gene-8.70-mRNA-1 protein Name:Similar to SAPK7 Serine/threonine-protein kinase SAPK7 (Oryza sativa subsp. japonica) AED:0.12 eAED:0.12 QI:115 0.83 1 1 1 1 7 226 305)'<br>1.8659521      |
| <b>protein modification.S-glutathionylation.glutaredoxin'</b>                                                    | xvis03_218158-pa | glutaredoxin (original description: augustus-gene-3.24-mRNA-1 protein Name:Similar to Glutaredoxin (Ricinus communis) AED:0.01 eAED:0.01 QI:220 1 1 1 1 4 501 106)'<br>1.1671811                                                                             |
| <b>protein modification.protein folding.protein folding catalyst (Cyclophilin)'</b>                              | xvis03_206458-pa | protein folding catalyst (original description: processed-gene-30.78-mRNA-1 protein Name:Similar to PCKR1 Peptidyl-prolyl cis-trans isomerase (Catharanthus roseus) AED:0.01 eAED:0.01 QI:0 -1 0 1 -1 1 0 173)' 0.88642055                                   |
| <b>protein modification.protein folding.protein folding catalyst (Cyclophilin)'</b>                              | xvis03_223454-pa | protein folding catalyst (original description: processed-gene-3.78-mRNA-1 protein Name:Similar to PCKR1 Peptidyl-prolyl cis-trans                                                                                                                           |

|                                                                                                               |                  |                                                                                                                                                                                                                                                 |
|---------------------------------------------------------------------------------------------------------------|------------------|-------------------------------------------------------------------------------------------------------------------------------------------------------------------------------------------------------------------------------------------------|
|                                                                                                               |                  | isomerase (Catharanthus roseus)<br>AED:0.02 eAED:0.02 QI:0 -1 0 1 -1 1 0 173)' 1.266422                                                                                                                                                         |
| <b>protein translocation.chloroplast.outer envelope insertion system.chaperone (AKR2)</b>                     | xvis03_217196-pa | chaperone (AKR2) (original description: augustus-gene-1.26-mRNA-1 protein Name:Similar to AKR2 Ankyrin repeat domain-containing protein 2 (Arabidopsis thaliana) AED:0.11 eAED:0.11 QI:0 0 0 1 1 1 6 0 276)' 1.775295                           |
| <b>protein translocation.nucleus.nucleocytoplasmic transport.importin alpha adaptor proteins'</b>             | xvis03_215434-pa | importin alpha adaptor proteins (original description: augustus-gene-6.51-mRNA-1 protein Name:Similar to Os01g0253300 Importin subunit alpha-1a (Oryza sativa subsp. japonica) AED:0.21 eAED:0.21 QI:191 0.81 0.75 1 1 1 12 0 614)' 2.079471    |
| <b>protein translocation.nucleus.nucleocytoplasmic transport.GTPase activation accessory protein (RanBp1)</b> | xvis03_204022-pa | GTPase activation accessory protein (RanBP1) (original description: processed-gene-29.69-mRNA-1 protein Name:Similar to RANBP1C Ran-binding protein 1 homolog c (Arabidopsis thaliana) AED:0.01 eAED:0.01 QI:85 1 1 1 1 1 4 338 224)' 1.8266815 |
| <b>RNA processing.RNA chaperone activities.RNA chaperone (CSp)'</b>                                           | xvis03_206453-pa | RNA chaperone (CSP) (original description: processed-gene-29.128-mRNA-1 protein Name:Similar to CSP4 Cold shock domain-containing protein 4 (Arabidopsis thaliana) AED:0.32 eAED:0.32 QI:0 -1 0 1 -1 1 1 0 231)' 1.2821975                      |
| <b>RNA processing.RNA chaperone activities.RNA chaperone (CSp)'</b>                                           | xvis03_223451-pa | RNA chaperone (CSP) (original description: processed-gene-3.71-mRNA-1 protein Name:Similar to                                                                                                                                                   |



|                                                                                                 |                  |                                                                                                                                                                                                                                                       |
|-------------------------------------------------------------------------------------------------|------------------|-------------------------------------------------------------------------------------------------------------------------------------------------------------------------------------------------------------------------------------------------------|
|                                                                                                 |                  | CSP1 Cold shock protein 1 (Arabidopsis thaliana) AED:0.30 eAED:0.30 QI:0 -1 0 1 -1 1 1 0 215)' 2.1634965                                                                                                                                              |
| <b>RNA processing.</b> RNA chaperone activities.RNA chaperone (RZ1 GR-RBP)'                     | xvis03_215153-pa | RNA chaperone (RZ1 GR-RBP) (original description: augustus-gene-12.40-mRNA-1 protein Name:Similar to RZ1B Glycine-rich RNA-binding protein RZ1B (Arabidopsis thaliana) AED:0.25 eAED:0.25 QI:0 1 1 1 0.5 0.33 3 1599 326)' 1.83855                    |
| <b>RNA processing.</b> organelle machinery.RNA editing.RNA editing factor (MORF-type)'          | xvis03_221754-pa | RNA editing factor (MORF) (original description: augustus-gene-1.62-mRNA-1 protein Name:Similar to MORF1 Multiple organellar RNA editing factor 1, mitochondrial (Arabidopsis thaliana) AED:0.23 eAED:0.23 QI:47 1 1 1 0.75 0.6 5 384 406)' 1.7289507 |
| <b>External stimuli response.</b> Temperature. Heat response.organelle chaperone (Clp-p Clp-m)' | xvis03_207210-pa | organellar chaperone (Clp-p Clp-m) (original description: augustus-gene-28.48-mRNA-1 protein Name:Similar to CLPB3 Chaperone protein ClpB3, mitochondrial (Oryza sativa subsp. japonica) AED:0.12 eAED:0.12 QI:139 1 1 1 1 1 10 182 968)' 1.7187872   |
| <b>External stimuli response.</b> temperature.cold response.mRNA chaperone (CSD)'               | xvis03_206453-pa | mRNA chaperone (CSD) (original description: processed-gene-29.128-mRNA-1 protein Name:Similar to CSP4 Cold shock domain-containing protein 4 (Arabidopsis thaliana) AED:0.32 eAED:0.32 QI:0 -1 0 1 -1 1 1 0 231)' 1.2821975                           |

|                                                                                                                                   |                      |                                                                                                                                                                                                                                                         |
|-----------------------------------------------------------------------------------------------------------------------------------|----------------------|---------------------------------------------------------------------------------------------------------------------------------------------------------------------------------------------------------------------------------------------------------|
| <b>External stimuli response.temperature.cold</b><br>response.mRNA chaperone (CSD)'                                               | xvis03_223451-pa     | mRNA chaperone (CSD) (original description: processed-gene-3.71-mRNA-1 protein Name:Similar to CSP1 Cold shock protein 1 (Arabidopsis thaliana) AED:0.30 eAED:0.30 QI:0 -1 0 1 -1 1 0 215)'<br>2.1634965                                                |
| <b>Lipid metabolism.glycerolipid</b><br>biosynthesis.phosphatidylcholine.CTp:phosphorylcholine<br>cytidylyltransferase'           | xvis03_202655-pa     | CTP:phosphorylcholine<br>cytidylyltransferase (original description: processed-gene-53.13-mRNA-1 protein Name:Similar to CCT2 Choline-phosphate cytidylyltransferase 2 (Arabidopsis thaliana) AED:0.15 eAED:0.15 QI:50 1 1 1 1 8 392 291)'<br>2.4340105 |
| <b>Lipid metabolism.lipid degradation.phospholipase</b><br>activities.phospholipase A2 activities.phospholipase A2<br>(ppLA2-II)' | xvis03_218200-pa     | phospholipase A2 (pPLA2-II) (original description: augustus-gene-6.42-mRNA-1 protein Name:Similar to PLP1 Patatin-like protein 1 (Oryza sativa subsp. japonica) AED:0.26 eAED:0.26 QI:72 0.4 0.16 1 1 6 0 314)'<br>1.306471                             |
| <b>Lipid metabolism.lipid degradation.fatty acid</b><br>degradation.core beta-oxidation.3-ketoacyl-CoA thiolase<br>(KAT)'         | xvis03_216330-pa     | 3-ketoacyl-CoA thiolase (KAT) (original description: processed-gene-6.102-mRNA-1 protein Name:Similar to PED1 3-ketoacyl-CoA thiolase 2, peroxisomal (Arabidopsis thaliana) AED:0.14 eAED:0.14 QI:702 0.85 0.93 0.93 1 1 15 1904 479)'<br>2.3141983     |
| <b>Lipid metabolism.lipid bodies-associated</b><br>activities.caleosin lipid body surface protein (CLO/pXG)'                      | xvis03_2212<br>36-pa | caleosin (original description: augustus-gene-4.54-mRNA-1 protein Name:Similar to PXG Peroxygenase (Oryza sativa subsp. japonica) AED:0.38 eAED:0.38                                                                                                    |

|  |  |                                                 |
|--|--|-------------------------------------------------|
|  |  | QI:85 0.66 0.85 0.85 1 1 7 299 316)'<br>1.63025 |
|--|--|-------------------------------------------------|

**Table S15:** List of the Bin names, id and description of the downregulated proteins at LRD

| BinName                                                                                        | id               | Description                                                                                                                                                                                                                                              |
|------------------------------------------------------------------------------------------------|------------------|----------------------------------------------------------------------------------------------------------------------------------------------------------------------------------------------------------------------------------------------------------|
| <b>photosynthesis</b> .photophosphorylation.photosystem II.LHC-II complex.component LHCb1/2/3' | xvis03_219722-pa | component LHCb1/2/3 of LHC-II complex (original description: augustus-gene-9.73-mRNA-1 protein Name:Similar to CAB36 Chlorophyll a-b binding protein 36, chloroplastic (Nicotiana tabacum) AED:0.36 eAED:0.36 QI:240 1 1 1 1 2 393 264)'                 |
| <b>photosynthesis</b> .photophosphorylation.photosystem II.LHC-II complex.component LHCb1/2/3' | xvis03_223077-pa | component LHCb1/2/3 of LHC-II complex (original description: processed-gene-1.89-mRNA-1 protein Name:Similar to CAB13 Chlorophyll a-b binding protein 13, chloroplastic (Solanum lycopersicum) AED:0.07 eAED:0.07 QI:182 1 1 1 1 4 188 263)'             |
| <b>photosynthesis</b> .photophosphorylation.photosystem II.LHC-II complex.component LHCb1/2/3' | xvis03_224654-pa | component LHCb1/2/3 of LHC-II complex (original description: processed-gene-1.9-mRNA-1 protein Name:Similar to CAB21 Chlorophyll a-b binding protein 21, chloroplastic (Nicotiana tabacum) AED:0.11 eAED:0.11 QI:0 0 0 0.5 1 1 2 0 328)'                 |
| <b>photosynthesis</b> .photophosphorylation.photosystem II.LHC-II complex.component LHCb4'     | xvis03_212711-pa | component LHCb4 of LHC-II complex (original description: processed-gene-16.130-mRNA-1 protein Name:Similar to LHCB4.2 Chlorophyll a-b binding protein CP29.2, chloroplastic (Arabidopsis thaliana) AED:0.05 eAED:0.05 QI:1875 1 1 1 0.5 0.33 3 204 289)' |
| <b>photosynthesis</b> .photophosphorylation.photosystem II.LHC-II complex.component LHCb5'     | xvis03_202336-pa | component LHCb5 of LHC-II complex (original description: augustus-gene-27.98-mRNA-1 protein Name:Similar to LHCB5 Chlorophyll a-b binding protein CP26, chloroplastic (Arabidopsis thaliana)                                                             |

|                                                                                                                                                |                  |                                                                                                                                                                                                                                                           |
|------------------------------------------------------------------------------------------------------------------------------------------------|------------------|-----------------------------------------------------------------------------------------------------------------------------------------------------------------------------------------------------------------------------------------------------------|
|                                                                                                                                                |                  | AED:0.08<br>eAED:0.08<br>QI:26 1 1 1 1 6 330 363 '                                                                                                                                                                                                        |
| <b>photosynthesis</b> .photophosphorylation.photosystem II.LHC-II complex.component LHCb6'                                                     | xvis03_217301-pa | component LHCb6 of LHC-II complex (original description: augustus-gene-11.85-mRNA-1 protein Name:Similar to CAP10A Chlorophyll a-b binding protein CP24 10A, chloroplastic (Solanum lycopersicum) AED:0.00 eAED:0.00 QI:77 1 1 1 1 2 315 254 '            |
| <b>photosynthesis</b> .photophosphorylation.photosystem II.pS-II complex.oxygen-evolving center (OEC) extrinsic proteins.component OEC33/psbO' | xvis03_219859-pa | component PsbO/OEC33 of PS-II oxygen-evolving center (original description: augustus-gene-3.73-mRNA-1 protein Name:Similar to PSBO Oxygen-evolving enhancer protein 1, chloroplastic (Solanum lycopersicum) AED:0.03 eAED:0.03 QI:216 1 1 1 1 2 224 332 ' |
| <b>photosynthesis</b> .photophosphorylation.photosystem I.LHC-I complex.component LHCa1'                                                       | xvis03_225147-pa | component LHCa1 of LHC-I complex (original description: augustus-gene-0.41-mRNA-1 protein Name:Similar to CAB6A Chlorophyll a-b binding protein 6A, chloroplastic (Solanum lycopersicum) AED:0.00 eAED:0.00 QI:106 1 1 1 1 3 75 204 '                     |
| <b>photosynthesis</b> .photophosphorylation.photosystem I.LHC-I complex.component LHCa1'                                                       | xvis03_225829-pa | component LHCa1 of LHC-I complex (original description: augustus-gene-0.17-mRNA-1 protein Name:Similar to LHCA1 Chlorophyll a-b binding protein 6, chloroplastic (Arabidopsis thaliana) AED:0.45 eAED:0.45 QI:0 0.44 0.4 0.5 1 1 10 334 459 '             |
| <b>photosynthesis</b> .photophosphorylation.photosystem I.LHC-I complex.component LHCa2'                                                       | xvis03_205558-pa | component LHCa2 of LHC-I complex (original description: augustus-gene-14.7-mRNA-1 protein Name:Similar to CAB7 Chlorophyll a-b binding protein 7, chloroplastic (Solanum lycopersicum) AED:0.16 eAED:0.16 QI:0 0.25 0.4 1 0.75 0.8 5 892 278 '            |

|                                                                                               |                  |                                                                                                                                                                                                                                               |
|-----------------------------------------------------------------------------------------------|------------------|-----------------------------------------------------------------------------------------------------------------------------------------------------------------------------------------------------------------------------------------------|
| <b>photosynthesis</b> .photophosphorylation.photosystem I.pS-I complex.component psaD'        | xvis03_207379-pa | component PsaD of PS-I complex (original description: processed-gene-13.65-mRNA-1 protein Name:Similar to psaD Photosystem I reaction center subunit II, chloroplastic (Cucumis sativus) AED:0.32 eAED:0.32 QI:0 -1 0 1 -1 1 1 0 274)'        |
| <b>photosynthesis</b> .photophosphorylation.photosystem I.pS-I complex.component psaF'        | xvis03_216014-pa | component PsaF of PS-I complex (original description: processed-gene-5.37-mRNA-1 protein Name:Similar to PSAF Photosystem I reaction center subunit III, chloroplastic (Arabidopsis thaliana) AED:0.24 eAED:0.24 QI:0 -1 0 1 -1 1 1 0 232)'   |
| <b>photosynthesis</b> .photophosphorylation.photosystem I.pS-I complex.component psaH'        | xvis03_205319-pa | component PsaH of PS-I complex (original description: processed-gene-30.54-mRNA-1 protein Name:Similar to PSAH1 Photosystem I reaction center subunit VI-1, chloroplastic (Arabidopsis thaliana) AED:0.09 eAED:0.09 QI:15 1 1 1 1 3 336 145)' |
| <b>photosynthesis</b> .photophosphorylation.photosystem I.pS-I complex.component psaL'        | xvis03_200779-pa | component PsaL of PS-I complex (original description: processed-gene-89.11-mRNA-1 protein Name:Similar to PSAL Photosystem I reaction center subunit XI, chloroplastic (Spinacia oleracea) AED:0.06 eAED:0.06 QI:217 1 1 1 1 2 190 220)'      |
| <b>photosynthesis</b> .calvin cycle.transketolase'                                            | xvis03_207774-pa | transketolase (original description: processed-gene-21.50-mRNA-1 protein Name:Similar to Transketolase, chloroplastic (Solanum tuberosum) AED:0.17 eAED:0.17 QI:154 0.85 0.75 1 1 1 8 0 716)'                                                 |
| <b>photosynthesis</b> .calvin cycle.transketolase'                                            | xvis03_219001-pa | transketolase (original description: processed-gene-2.79-mRNA-1 protein Name:Similar to Transketolase, chloroplastic (Solanum tuberosum) AED:0.04 eAED:0.04 QI:238 1 1 1 1 1 7 473 742)'                                                      |
| <b>Carbohydrate metabolism</b> .starch metabolism.biosynthesis.ADp-glucose pyrophosphorylase' | xvis03_220998-pa | ADP-glucose pyrophosphorylase (original description: augustus-gene-7.121-mRNA-1 protein Name:Similar to ADG2 Glucose-1-phosphate adenylyltransferase large subunit                                                                            |

|                                                                                                                                      |                  |                                                                                                                                                                                                                                                                         |
|--------------------------------------------------------------------------------------------------------------------------------------|------------------|-------------------------------------------------------------------------------------------------------------------------------------------------------------------------------------------------------------------------------------------------------------------------|
|                                                                                                                                      |                  | 1, chloroplastic ( <i>Arabidopsis thaliana</i> )<br>AED:0.11 eAED:0.11<br>QI:196 0.92 0.86 1 0.85 0.86 15 136 540)'                                                                                                                                                     |
| <b>Carbohydrate metabolism</b> .starch metabolism.biosynthesis.starch synthase activities.granule-bound starch (amylose) synthase    | xvis03_225238-pa | granule-bound starch (amylose) synthase (original description: augustus-gene-0.18-mRNA-1 protein Name:Similar to WAXY Granule-bound starch synthase 1, chloroplastic/amyloplastic ( <i>Antirrhinum majus</i> ) AED:0.11 eAED:0.11<br>QI:73 1 1 1 0.92 0.85 14 142 611)' |
| <b>Carbohydrate metabolism</b> .oxidative pentose phosphate pathway.non-oxidative phase.transketolase'                               | xvis03_207774-pa | transketolase (original description: processed-gene-21.50-mRNA-1 protein Name:Similar to Transketolase, chloroplastic ( <i>Solanum tuberosum</i> ) AED:0.17 eAED:0.17<br>QI:154 0.85 0.75 1 1 1 8 0 716)'                                                               |
| <b>Carbohydrate metabolism</b> .oxidative pentose phosphate pathway.non-oxidative phase.transketolase'                               | xvis03_219001-pa | transketolase (original description: processed-gene-2.79-mRNA-1 protein Name:Similar to Transketolase, chloroplastic ( <i>Solanum tuberosum</i> ) AED:0.04 eAED:0.04<br>QI:238 1 1 1 1 1 7 473 742)'                                                                    |
| <b>Carbohydrate metabolism</b> .gluconeogenesis.pyruvate orthophosphate dikinase activity.pyruvate orthophosphate dikinase'          | xvis03_201017-pa | pyruvate orthophosphate dikinase (original description: processed-gene-109.26-mRNA-1 protein Name:Similar to PPD Pyruvate, phosphate dikinase, chloroplastic ( <i>Mesembryanthemum crystallinum</i> ) AED:0.09 eAED:0.09<br>QI:8 1 1 1 0.89 0.9 20 257 985)'            |
| <b>Carbohydrate metabolism</b> .nucleotide sugar biosynthesis.UDP-L-arabinose biosynthesis.UDP-L-arabinose mutase'                   | xvis03_224372-pa | UDP-L-arabinose mutase (original description: processed-gene-2.16-mRNA-1 protein Name:Similar to UAM1 UDP-arabinopyranose mutase 1 ( <i>Oryza sativa</i> subsp. <i>japonica</i> ) AED:0.08 eAED:0.08<br>QI:87 1 1 1 1 1 4 347 359)'                                     |
| <b>protein homeostasis</b> .ubiquitin-proteasome system.26S proteasome.20S core particle.beta-type components.component beta type-5' | xvis03_211689-pa | component beta type-5 of 26S proteasome (original description: processed-gene-6.93-mRNA-1 protein Name:Similar to Proteasome subunit beta type-5 ( <i>Spinacia</i>                                                                                                      |

|                                                                                                                                                                      |                      |                                                                                                                                                                                                                                                                                                    |
|----------------------------------------------------------------------------------------------------------------------------------------------------------------------|----------------------|----------------------------------------------------------------------------------------------------------------------------------------------------------------------------------------------------------------------------------------------------------------------------------------------------|
|                                                                                                                                                                      |                      | oleracea) AED:0.07 eAED:0.07<br>QI:0 1 0.87 1 1 1 8 489 310)'                                                                                                                                                                                                                                      |
| <b>protein homeostasis</b> .proteolysis.cysteine-type<br>peptidase activities.C13-class asparaginyl<br>endopeptidase (Legumain)'                                     | xvis03_211268-<br>pa | asparaginyl endopeptidase (Legumain)<br>(original description: processed-gene-9.25-<br>mRNA-1 protein Name:Similar to Vacuolar-<br>processing enzyme (Citrus sinensis)<br>AED:0.07 eAED:0.07<br>QI:3 1 1 1 1 1 9 417 590)'                                                                         |
| <b>protein homeostasis</b> .proteolysis.serine-type<br>peptidase activities.S28-class serine<br>carboxypeptidase'                                                    | xvis03_222506-<br>pa | S28-class serine carboxypeptidase (original<br>description: augustus-gene-4.97-mRNA-1<br>protein Name:Similar to EDA2 Probable<br>serine protease EDA2 (Arabidopsis thaliana)<br>AED:0.31 eAED:0.31<br>QI:159 0.92 0.92 1 1 1 14 279 488)'                                                         |
| <b>Protein homeostasis</b> .proteolysis.metallopeptidase<br>activities.aminopeptidase activities.M1-class<br>neutral/aromatic-hydroxyl amino acid<br>aminopeptidase' | xvis03_210782-<br>pa | M1 neutral/aromatic-hydroxyl amino acid<br>aminopeptidase (original description:<br>augustus-gene-7.64-mRNA-1 protein<br>Name:Similar to Os08g0562700 Puromycin-<br>sensitive aminopeptidase (Oryza sativa subsp.<br>japonica) AED:0.20 eAED:0.20<br>QI:160 0.75 0.81 0.90 0.84 0.84 33 284 1052)' |
| <b>Redox homeostasis</b> .hydrogen peroxide<br>removal.ascorbate-glutathione cycle.ascorbate<br>peroxidase (ApX)'                                                    | xvis03_214214-<br>pa | ascorbate peroxidase (APX) (original<br>description: processed-gene-11.33-mRNA-1<br>protein Name:Similar to APX1 L-ascorbate<br>peroxidase, cytosolic (Pisum sativum)<br>AED:0.17 eAED:0.17<br>QI:131 1 1 1 1 1 7 558 249)'                                                                        |
| <b>Redox homeostasis</b> .hydrogen peroxide<br>removal.ascorbate-glutathione<br>cycle.monodehydroascorbate reductase (MDAR)'                                         | xvis03_204322-<br>pa | monodehydroascorbate reductase (MDAR)<br>(original description: processed-gene-9.15-<br>mRNA-1 protein Name:Similar to AFRR<br>Monodehydroascorbate reductase (Solanum<br>lycopersicum) AED:0.13 eAED:0.13<br>QI:138 0.72 0.83 0.83 1 1 12 368 489)'                                               |
| <b>Redox homeostasis</b> .hydrogen peroxide<br>removal.ascorbate-glutathione cycle.glutathione<br>reductase (GR)'                                                    | xvis03_205102-<br>pa | glutathione reductase (GR) (original<br>description: processed-gene-9.15-mRNA-1<br>protein Name:Similar to GOR Glutathione<br>reductase, chloroplastic (Fragment)                                                                                                                                  |

|                                                                                                                                                         |                      |                                                                                                                                                                                                                                                    |
|---------------------------------------------------------------------------------------------------------------------------------------------------------|----------------------|----------------------------------------------------------------------------------------------------------------------------------------------------------------------------------------------------------------------------------------------------|
|                                                                                                                                                         |                      | (Nicotiana tabacum) AED:0.14 eAED:0.14<br>QI:0 1 0.90 1 0.9 0.81 11 639 590)'                                                                                                                                                                      |
| <b>Cell</b><br>organisation.pectin.homogalacturonan.modification<br>and degradation.pectin methylesterase'                                              | xvis03_217074-<br>pa | pectin methylesterase (original description:<br>processed-gene-2.49-mRNA-1 protein<br>Name:Similar to PME35 Probable<br>pectinesterase/pectinesterase inhibitor 35<br>(Arabidopsis thaliana) AED:0.36 eAED:0.36<br>QI:662 1 1 1 1 3 218 442)'      |
| <b>Cell wall</b> organisation.pectin.rhamnogalacturonan<br>I.modification and degradation.beta-galactosidase<br>(BGAL)'                                 | xvis03_221434-<br>pa | beta-galactosidase (BGAL) (original<br>description: processed-gene-2.106-mRNA-1<br>protein Name:Similar to Beta-galactosidase<br>(Asparagus officinalis) AED:0.13 eAED:0.13<br>QI:277 1 1 1 1 19 418 832)'                                         |
| <b>Coenzyme metabolism</b> .thiamine pyrophosphate<br>biosynthesis.thiazole biosynthesis.biosynthetic<br>protein (Thi4)'                                | xvis03_212280-<br>pa | biosynthetic protein (Thi4) (original<br>description: processed-gene-6.79-mRNA-1<br>protein Name:Similar to THI1-2 Thiamine<br>thiazole synthase 2, chloroplastic (Vitis<br>vinifera) AED:0.02 eAED:0.02<br>QI:212 1 1 1 1 2 483 354)'             |
| <b>Coenzyme metabolism</b> .tetrapyrrol<br>biosynthesis.chlorophyll<br>metabolism.chlorophyll(ide)<br>interconversions.geranylgeranyl reductase (Chlp)' | xvis03_215774-<br>pa | geranylgeranyl reductase (Chlp) (original<br>description: augustus-gene-7.23-mRNA-1<br>protein Name:Similar to CHLP<br>Geranylgeranyl diphosphate reductase,<br>chloroplastic (Nicotiana tabacum) AED:0.00<br>eAED:0.00 QI:382 1 1 1 1 2 212 364)' |
| <b>protein biosynthesis</b> .aminoacyl-tRNA synthetase<br>activities.alanine-tRNA ligase'                                                               | xvis03_224672-<br>pa | alanine-tRNA ligase (original description:<br>processed-gene-1.89-mRNA-1 protein<br>Name:Similar to ALATS Alanine--tRNA<br>ligase (Arabidopsis thaliana) AED:0.10<br>eAED:0.10 QI:33 1 1 1 0.90 0.90 22 389 993)'                                  |
| <b>protein biosynthesis</b> .aminoacyl-tRNA synthetase<br>activities.aspartate-tRNA ligase'                                                             | xvis03_205724-<br>pa | aspartate-tRNA ligase (original description:<br>processed-gene-33.32-mRNA-1 protein<br>Name:Similar to IBI1 Aspartate--tRNA ligase<br>2, cytoplasmic (Arabidopsis thaliana)<br>AED:0.10 eAED:0.10<br>QI:60 0.77 0.8 1 1 1 10 190 552)'             |
